# Supplementary material for: Evaluation of CORDEX ERA5-forced NARCliM2.0 regional climate models over Australia using the Weather Research and Forecasting (WRF) model version 4.1.2
Source: Copernicus journal article supplement (doi:10.5194/gmd-18-703-2025), 2025-02-07
Supplement: Supplementary file 1 [file gmd-18-703-2025-supplement.pdf]

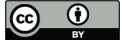

*Supplement of*

**Evaluation of CORDEX ERA5-forced NARClIM2.0 regional climate models over Australia using the Weather Research and Forecasting (WRF) model version 4.1.2**

**Giovanni Di Virgilio et al.**

*Correspondence to:* Giovanni Di Virgilio ([giovanni.divirgilio@environment.nsw.gov.au](mailto:giovanni.divirgilio@environment.nsw.gov.au), [giovanni@unsw.edu.au](mailto:giovanni@unsw.edu.au))

The copyright of individual parts of the supplement might differ from the article licence.

### Eastern Australia

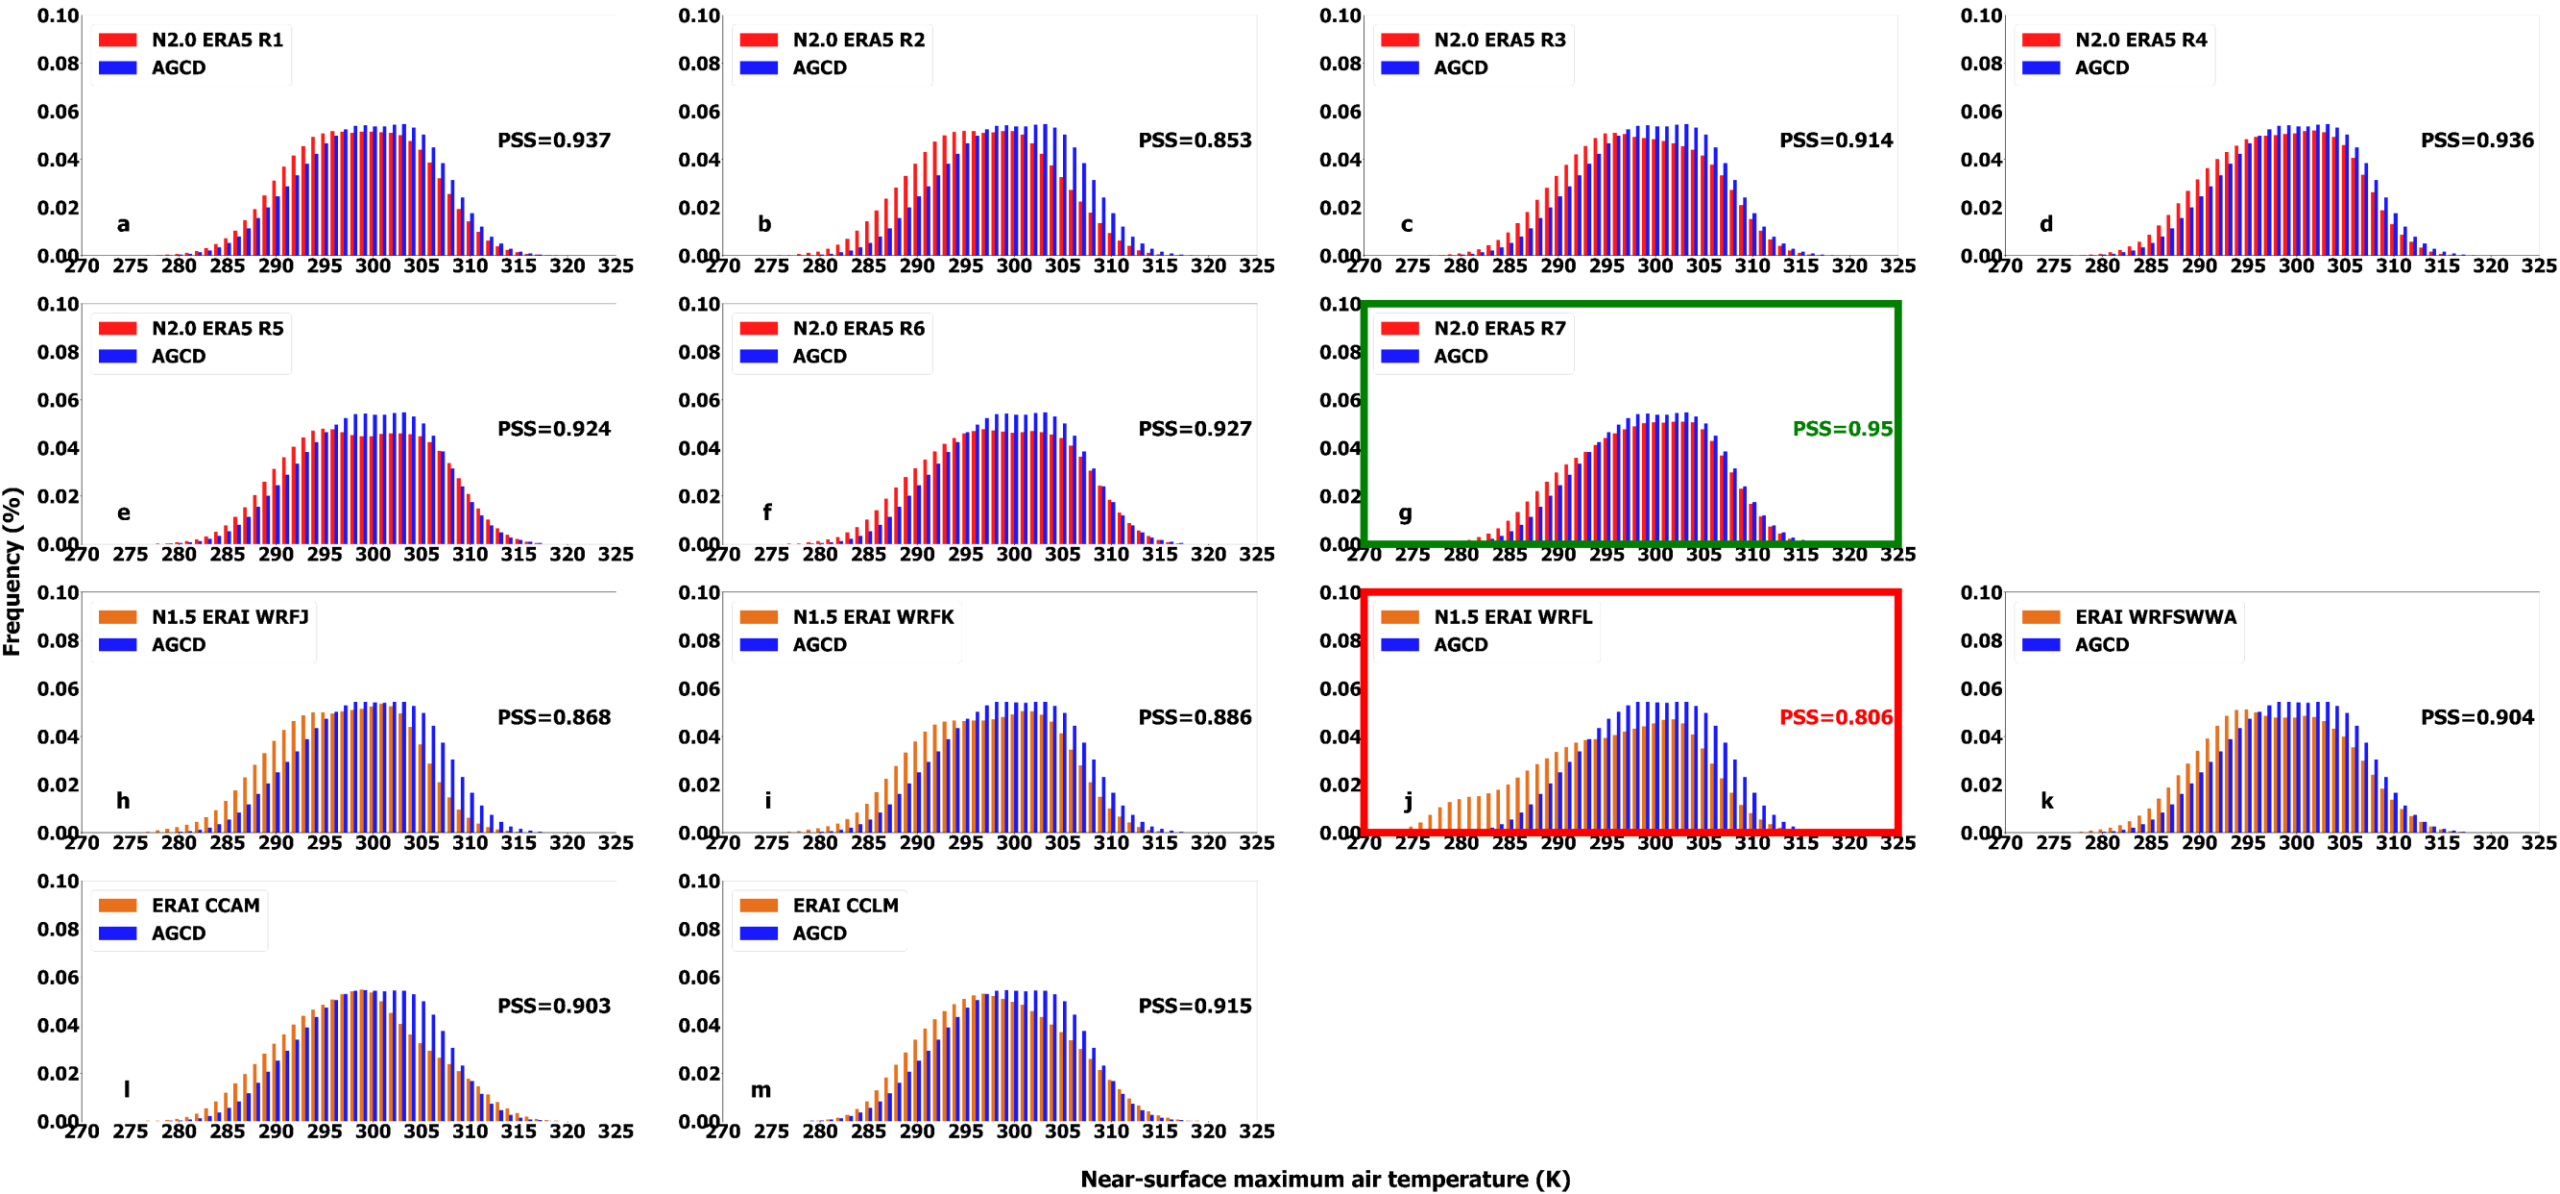

**Fig. S1** Probability density functions of daily maximum near-surface air temperature (K) with bin width of 1 K in the Eastern Australia Natural Resource Management (NRM) region.

### Southern Australia

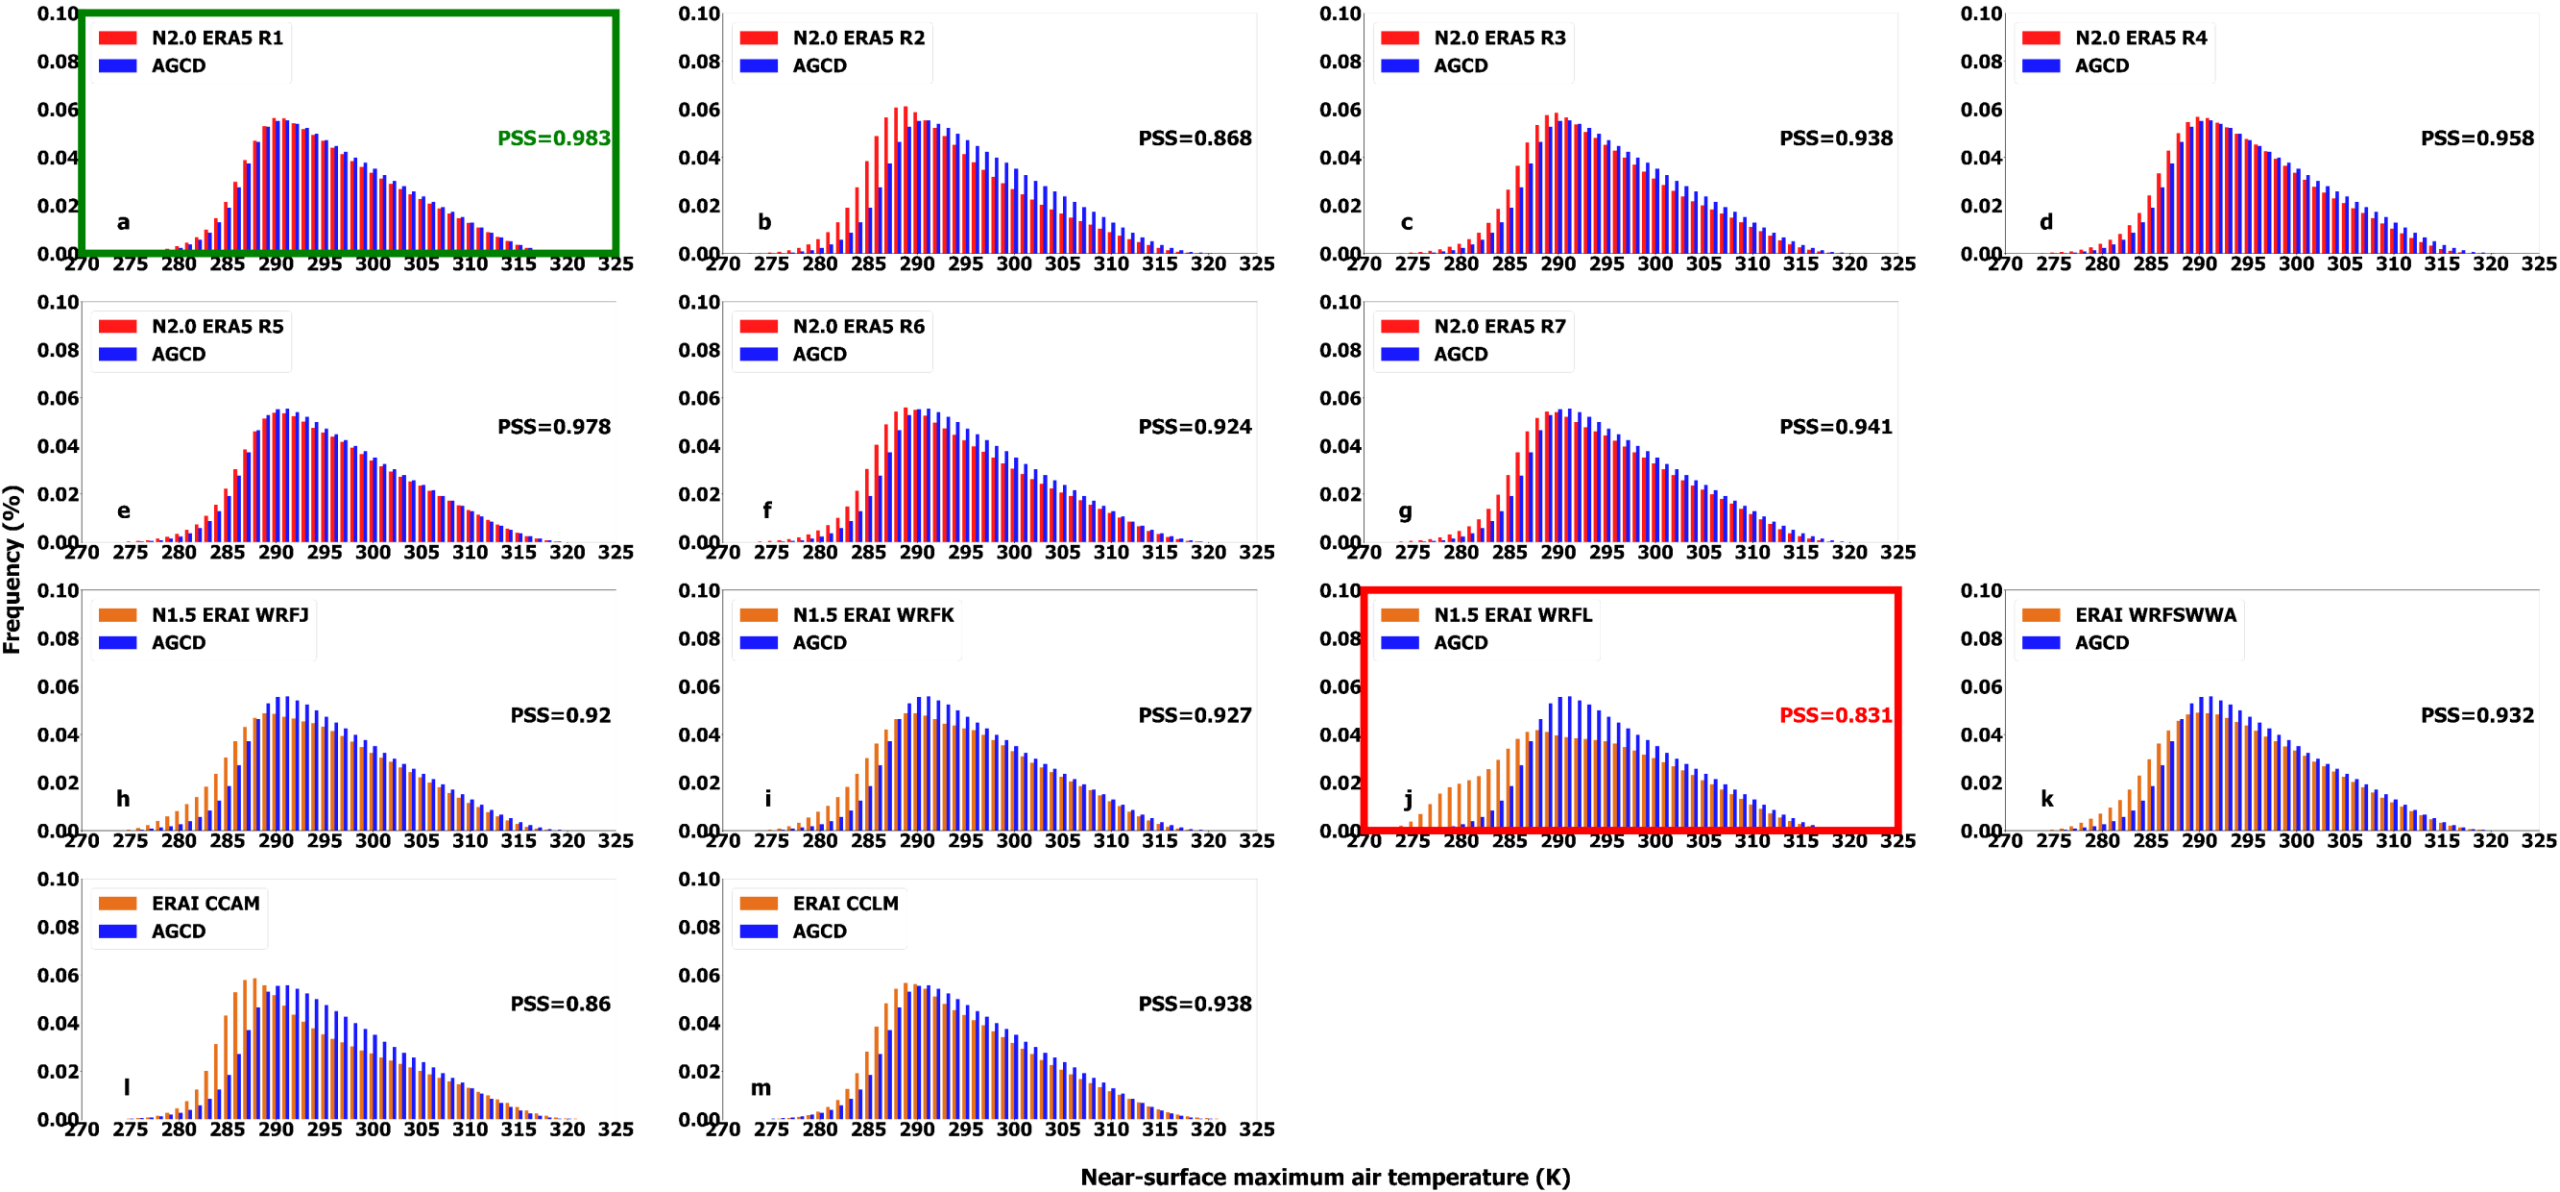

**Fig. S2** Probability density functions of daily maximum near-surface air temperature (K) with bin width of 1 K in the Southern Australia Natural Resource Management (NRM) region.

### Rangelands

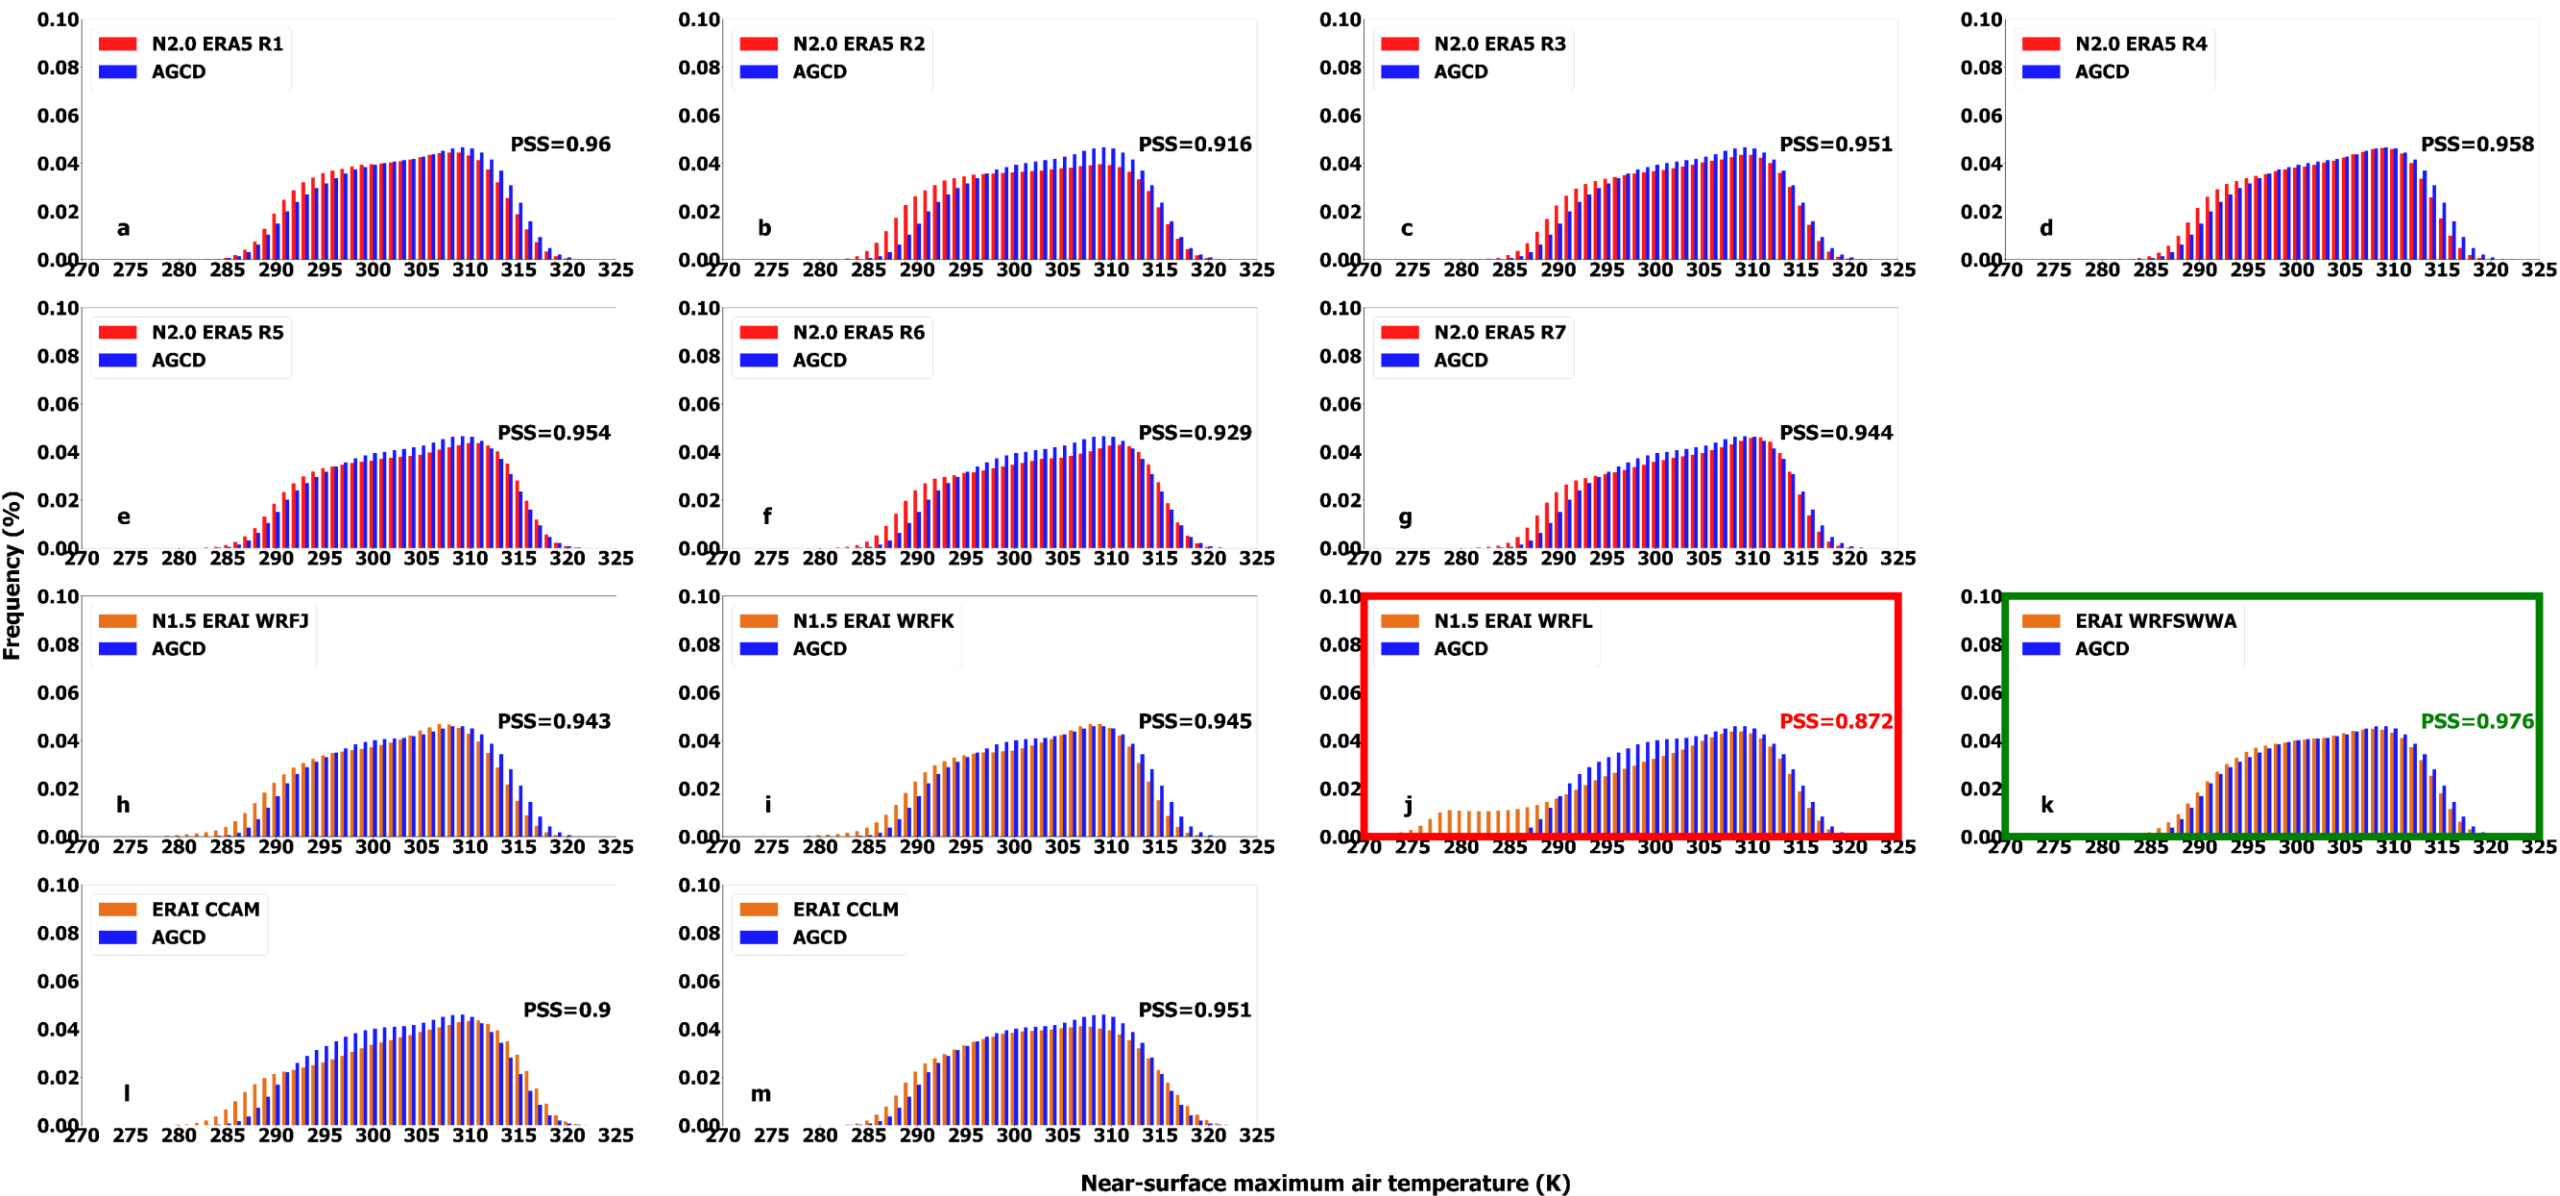

**Fig. S3** Probability density functions of daily maximum near-surface air temperature (K) with bin width of 1 K in the Rangelands Natural Resource Management (NRM) region.

### Northern Australia

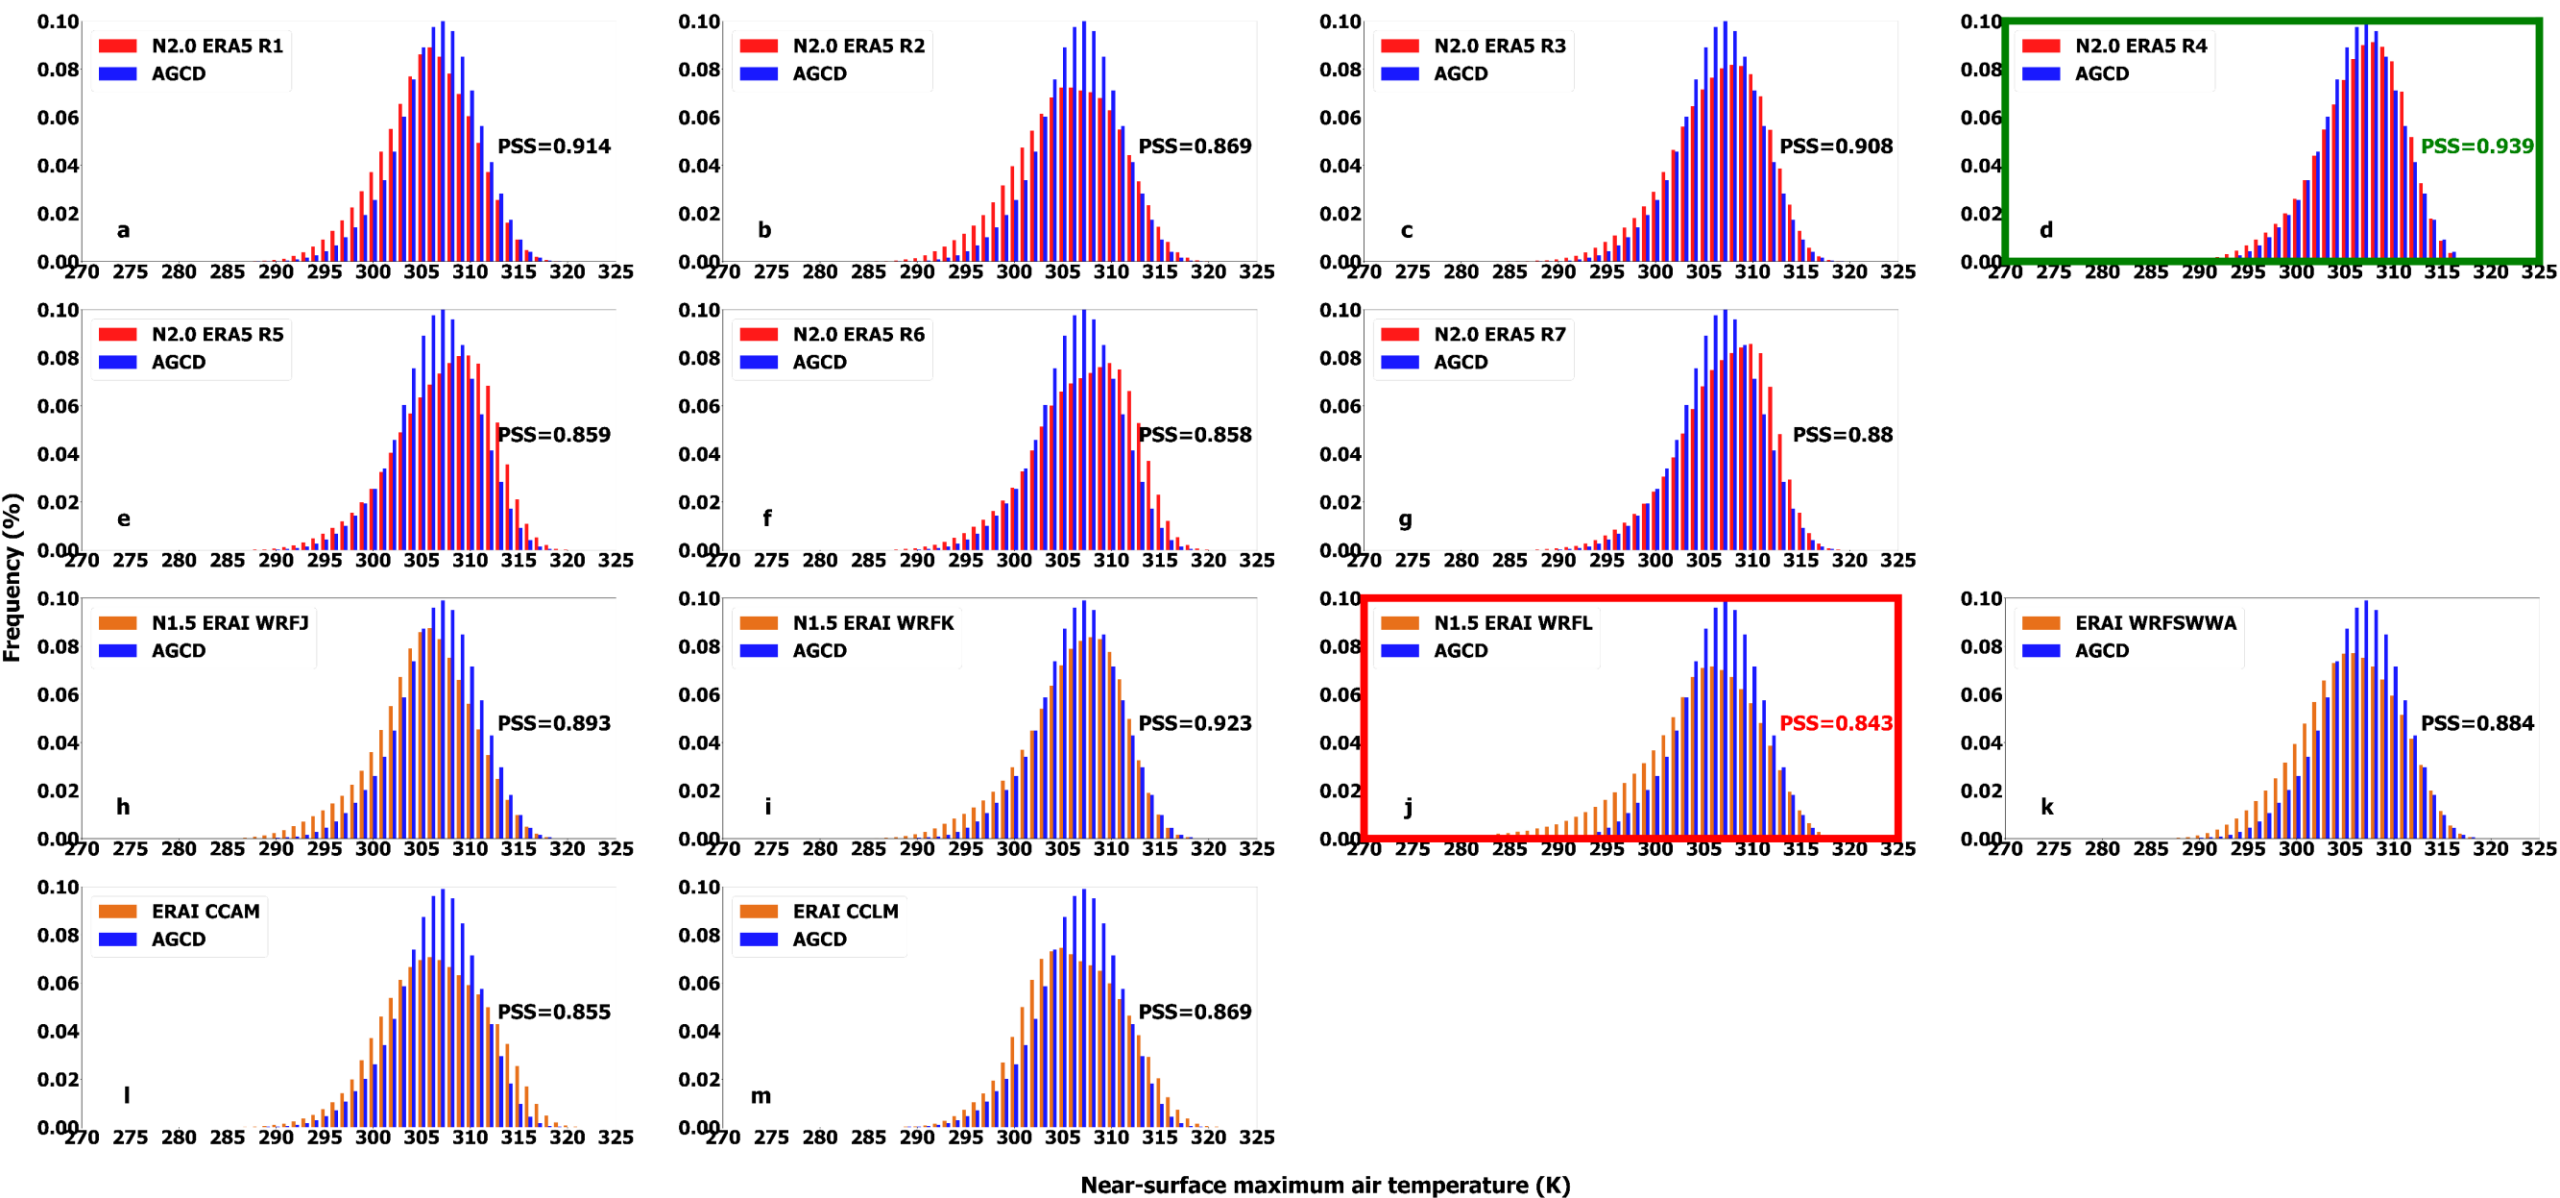

**Fig. S4** Probability density functions of daily maximum near-surface air temperature (K) with bin width of 1 K in the Northern Australia Natural Resource Management (NRM) region.

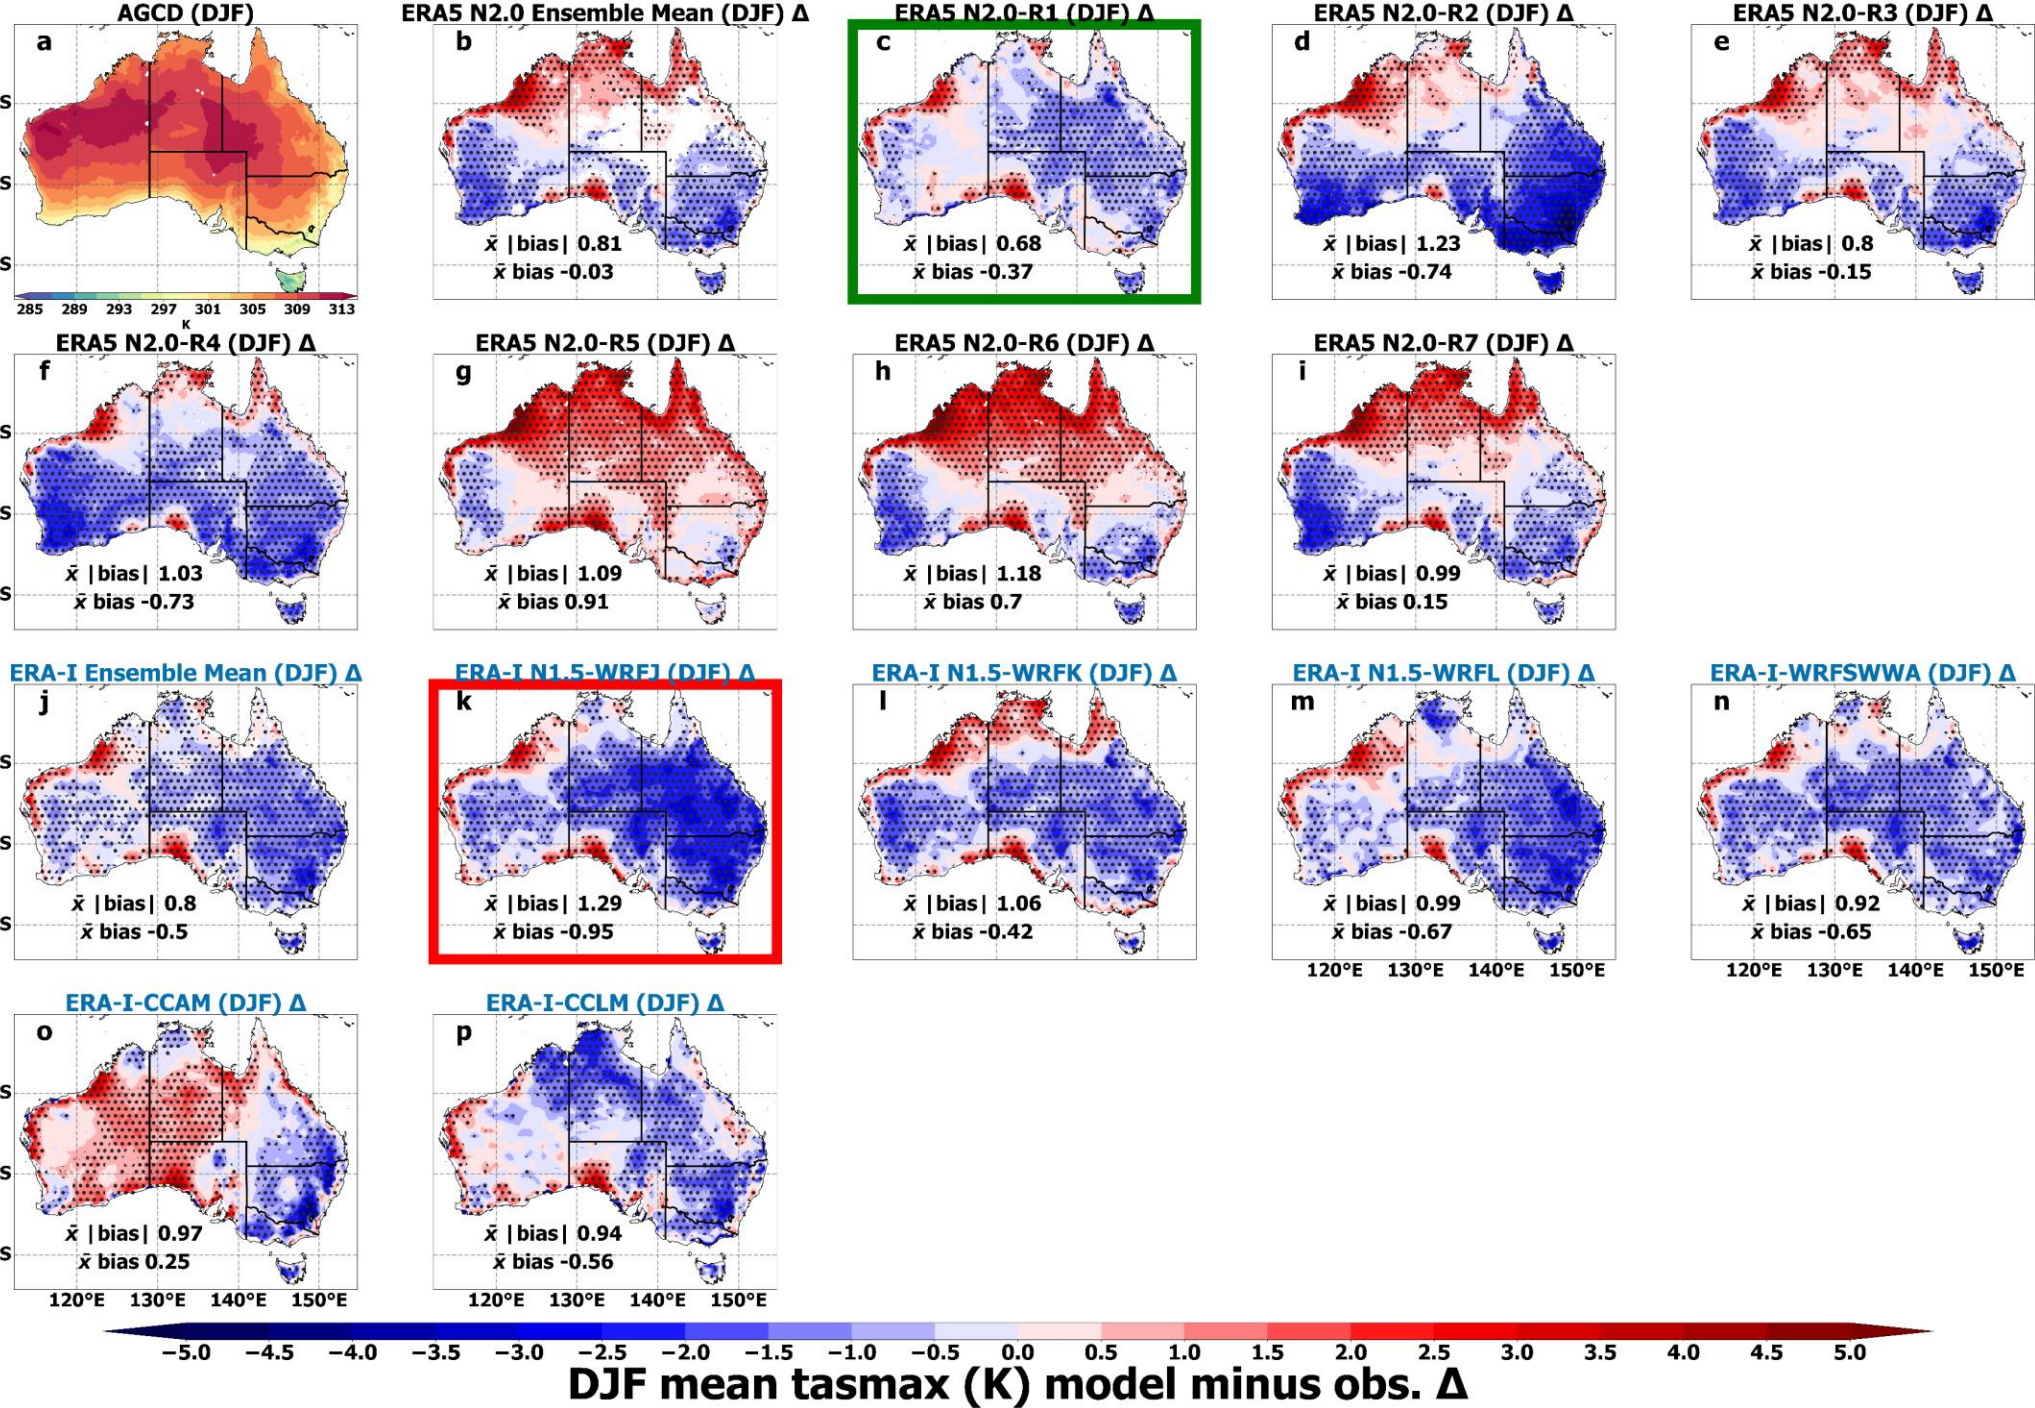

**Fig. S5** Summer (DJF) maximum temperature bias with respect to Australian Gridded Climate Data (AGCD) observations for 1981-2010. Stippled areas indicate locations where an RCM shows statistically significant bias ( $P < 0.05$ ). **b** Significance stippling for the ensemble mean bias follows Tebaldi et al. (2011) and is applied separately to each of the two RCM ensembles. Statistically insignificant areas are shown in colour, denoting that less than half of the models are significantly biased. In significant agreeing areas (stippled), at least half of RCMs are significantly biased, and at least 66% of significant RCMs in each ensemble agree on the direction of the bias. Significant disagreeing areas are shown in white, which are where at least half of the models are significantly biased and less than 66% of significant models in each ensemble agree on the bias direction - see main text for additional detail on the stippling regime. Panel boundaries in green (red) indicate the RCMs with lowest (highest) area-averaged mean absolute biases.

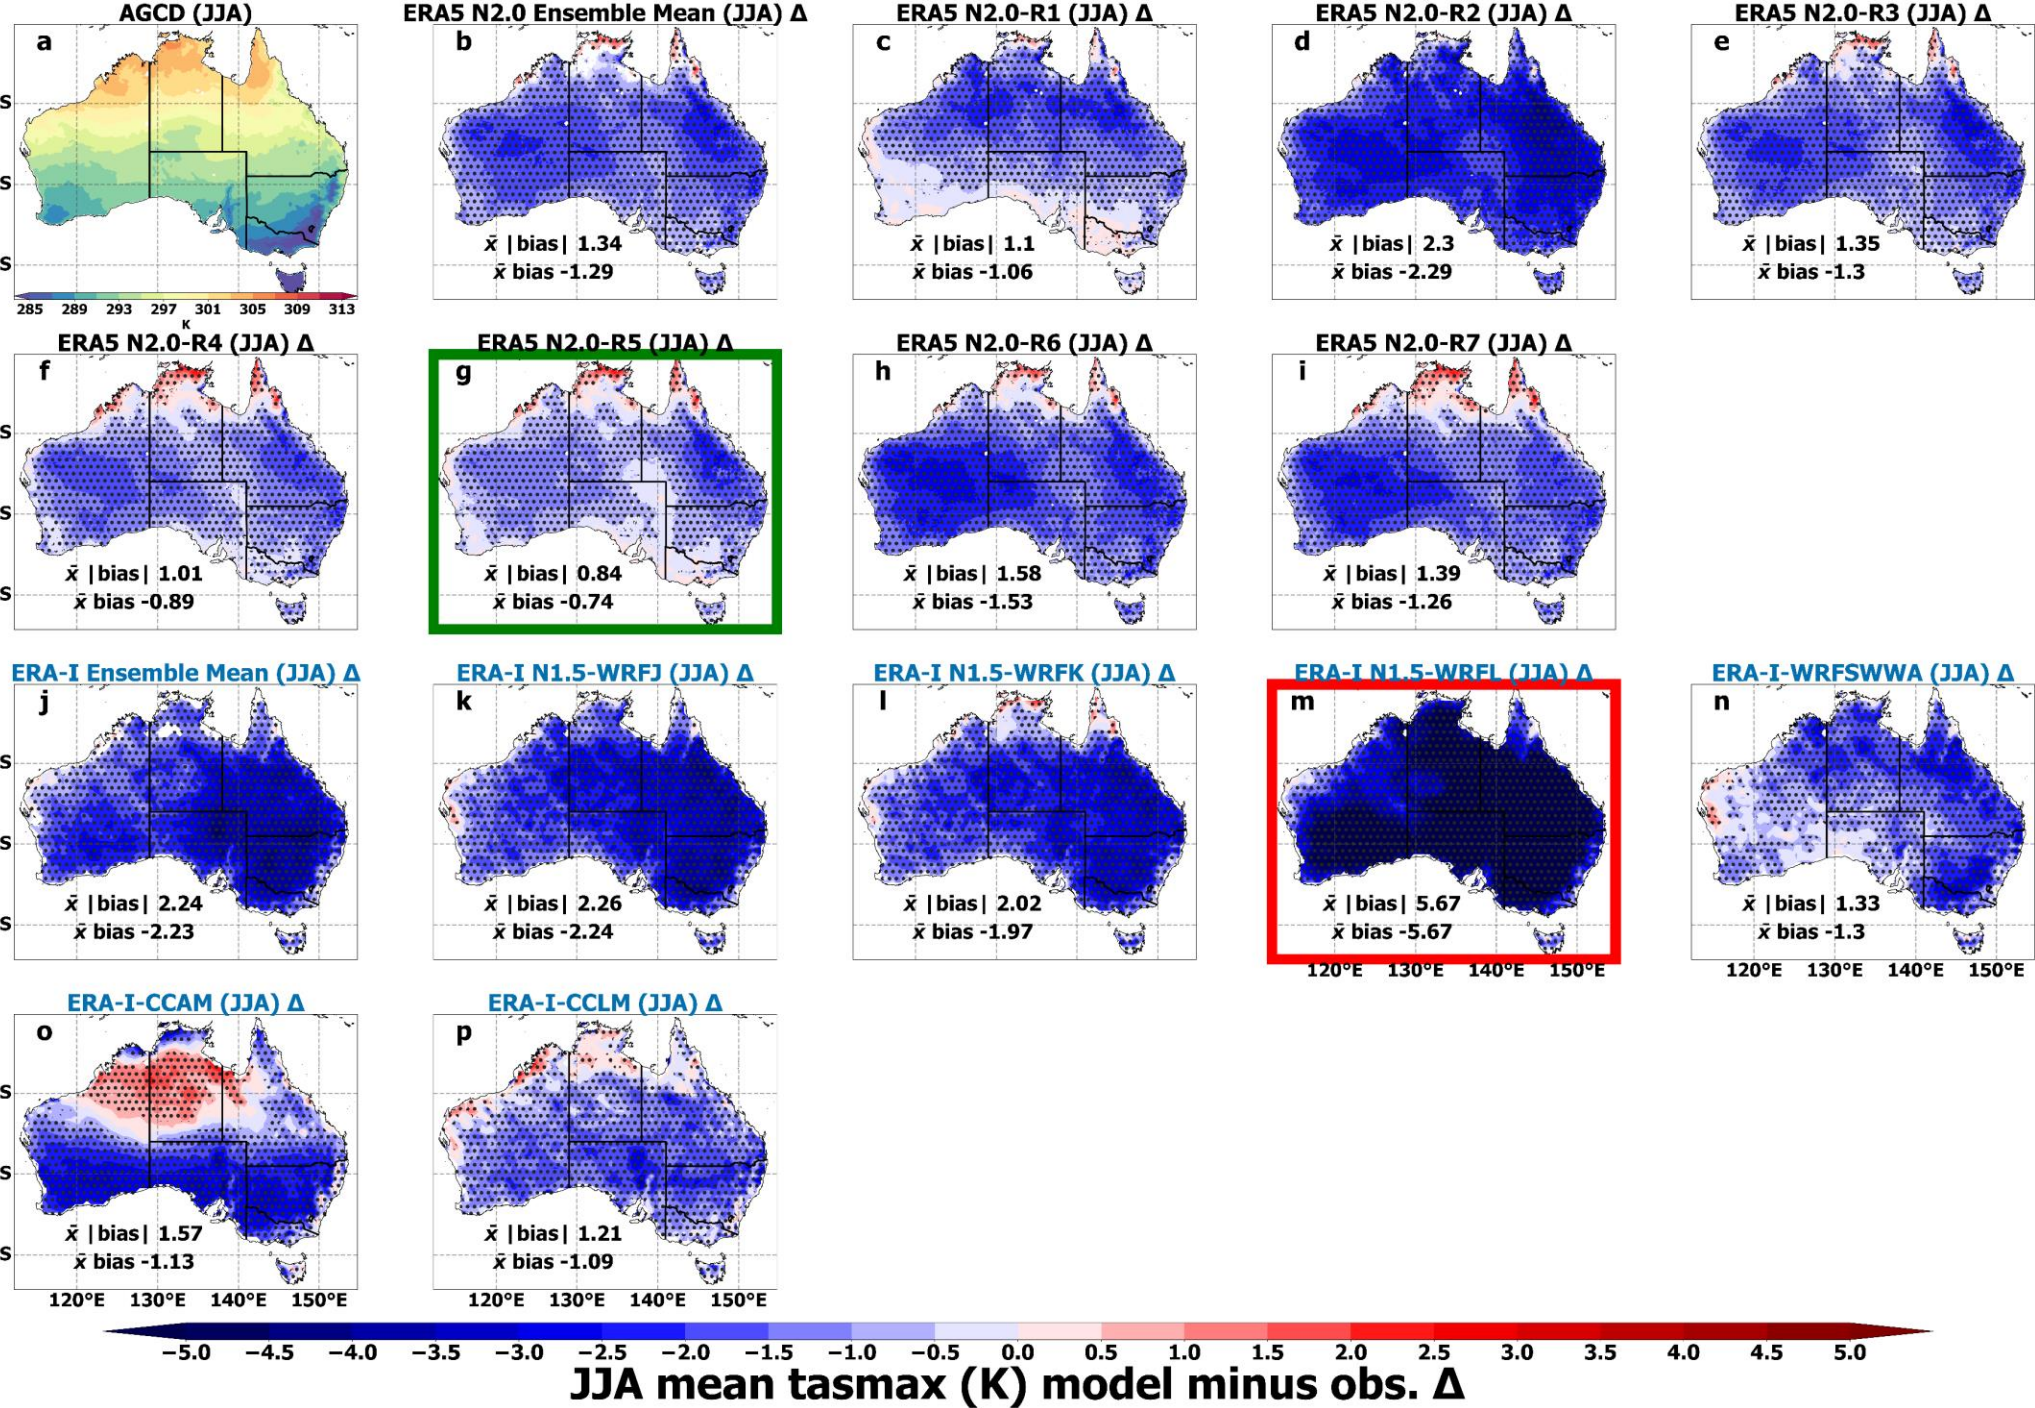

**Fig. S6** Winter (JJA) maximum temperature bias with respect to gridded observations. Stippling and panel boundary colouring as per Figure S5.

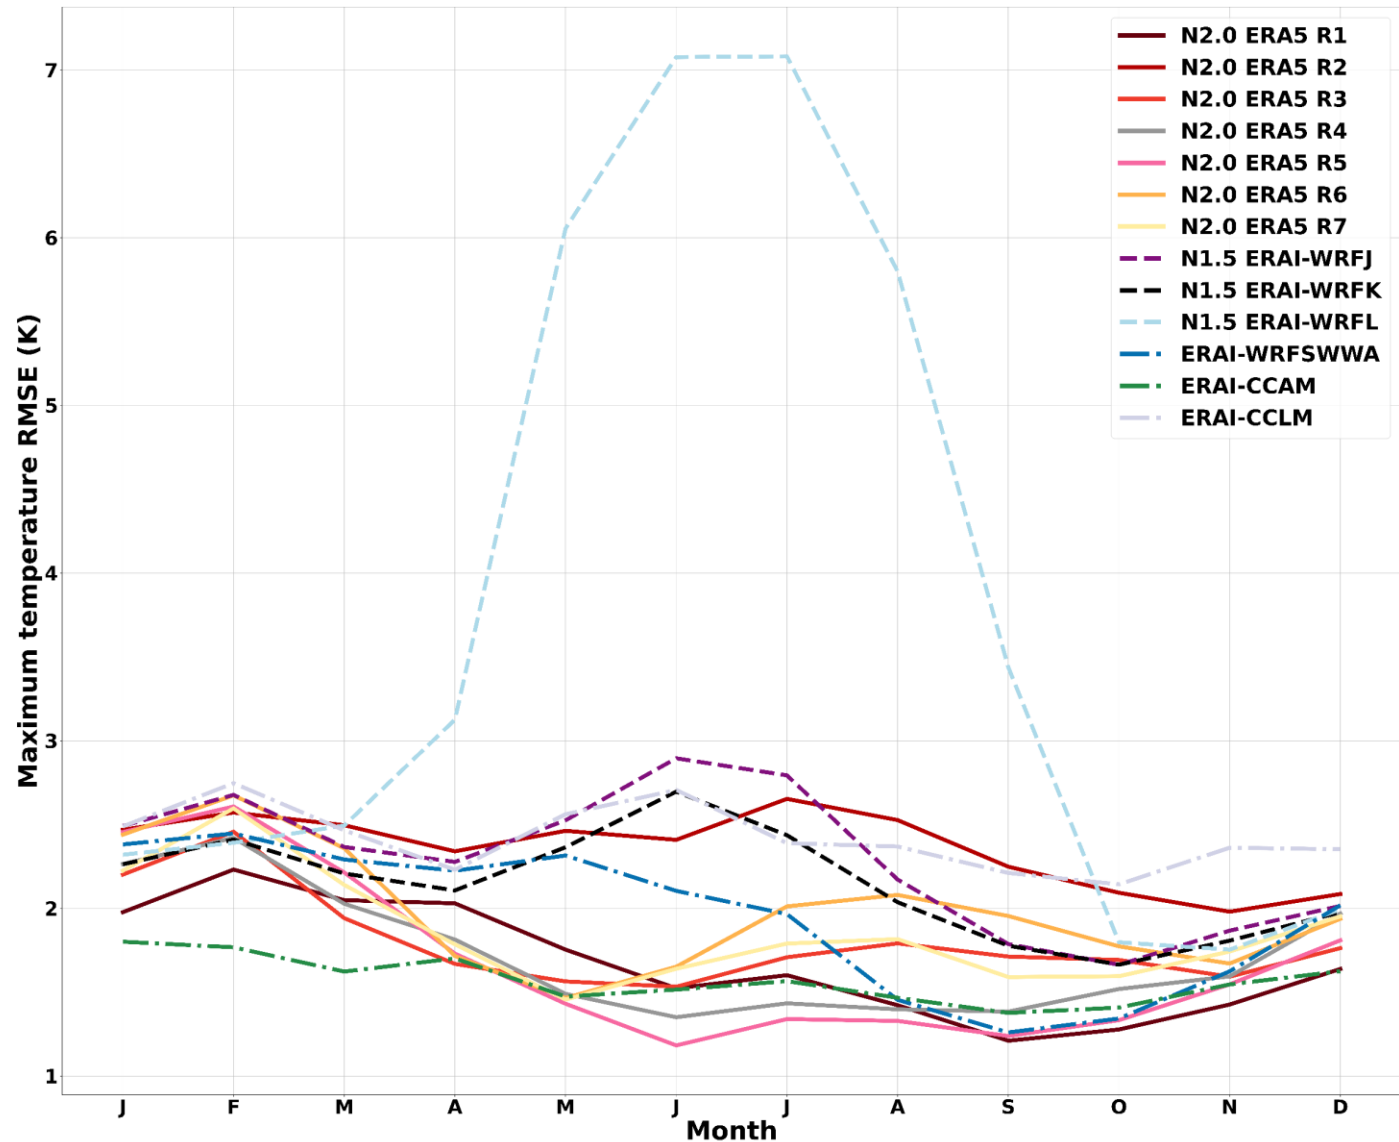

**Fig. S7** RMSE annual cycle for historical maximum near surface temperature (K) as simulated over Australia by the ERA5-forced and ERA-Interim-forced RCMs.



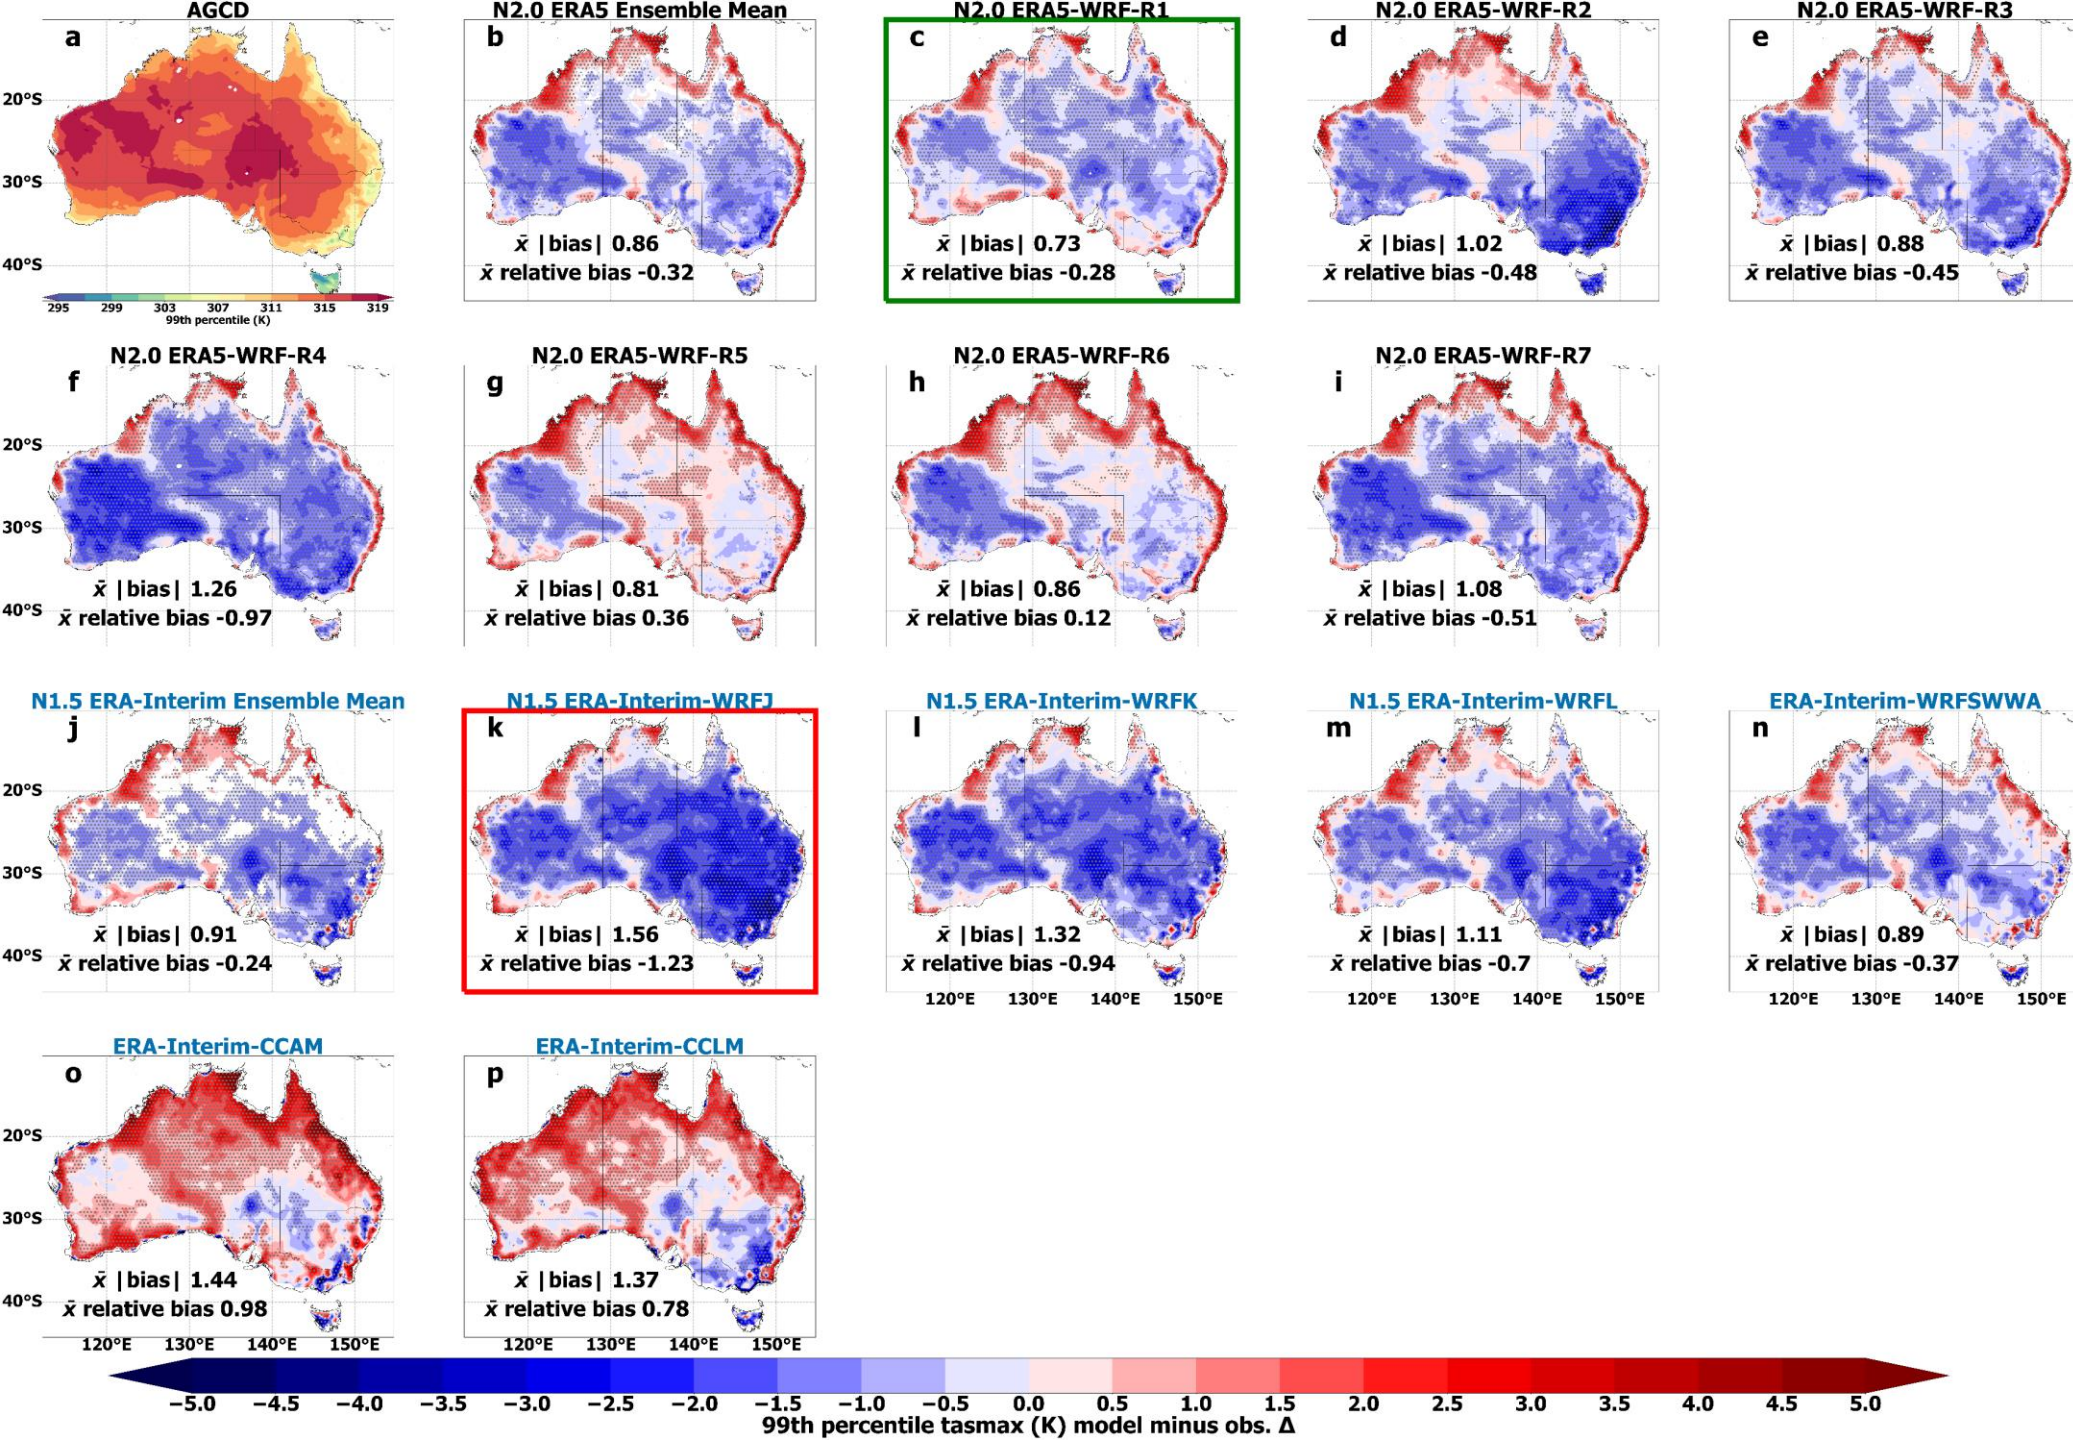

**Fig. S8** Biases in 99<sup>th</sup> percentile maximum temperatures simulated by the ERA5 and ERA-Interim forced RCMs relative to AGCD gridded observations with stippling and panel boundary colouring as per Fig. S5.

**Table S1.** Diagnostics for seven (R1-R7) ERA5-forced regional climate models (RCMs) and six ERA-Interim-forced RCMs and their respective ensemble means for 1981-2010 with Australian Gridded Climate Data as reference data. Mean absolute biases are shown for annual and seasonal mean maximum and minimum temperature and precipitation, for annual extreme maximum and minimum temperature and precipitation, as well as Perkins Skill Scores (PSS) for the daily distributions of these variables for the CORDEX-Australasia domain over Australia (20 km resolution). Bold values indicate which of the ERA5-RCMs R1-R7 has the best diagnostic score from this RCM set.

|            |            | CORDEX Australasia (20 km) |                              |             |             |                                 |              |           |          |             |              |             |             |              |  |
|------------|------------|----------------------------|------------------------------|-------------|-------------|---------------------------------|--------------|-----------|----------|-------------|--------------|-------------|-------------|--------------|--|
| Variable   | Generation | RCM                        | Climate Means:<br>Mean  bias |             |             | Climate Extremes:<br>Mean  bias |              | PSS       |          |             |              |             |             |              |  |
|            |            |                            | Annual                       | DJF         | JJA         | Annual                          |              |           |          |             |              |             |             |              |  |
| tasmax (K) | ERA5-RCMs  | Ensemble                   | 0.85                         | 0.81        | 1.34        | 0.86                            | N/A          | ERA5-RCMs | Ensemble | 7.28        | 18.42        | 4.31        | 8.64        | N/A          |  |
|            |            | R1                         | 0.83                         | <b>0.68</b> | 1.10        | <b>0.73</b>                     | 0.957        |           | R1       | 13.48       | 27.82        | 5.17        | 20.02       | 0.773        |  |
|            |            | R2                         | 1.61                         | 1.23        | 2.30        | 1.02                            | 0.917        |           | R2       | 11.33       | 22.79        | 5.06        | 14.83       | <b>0.817</b> |  |
|            |            | R3                         | 0.90                         | 0.80        | 1.35        | 0.88                            | 0.950        |           | R3       | 8.31        | 19.72        | <b>5.02</b> | 9.80        | 0.805        |  |
|            |            | R4                         | 0.92                         | 1.03        | 1.01        | 1.26                            | <b>0.958</b> |           | R4       | <b>7.46</b> | <b>16.33</b> | 5.67        | <b>9.21</b> | 0.801        |  |
|            |            | R5                         | <b>0.54</b>                  | 1.09        | <b>0.84</b> | 0.81                            | 0.942        |           | R5       | 12.59       | 33.93        | 5.21        | 11.40       | 0.814        |  |
|            |            | R6                         | 0.85                         | 1.18        | 1.58        | 0.86                            | 0.922        |           | R6       | 16.29       | 49.29        | 6.16        | 10.25       | 0.787        |  |
|            |            | R7                         | 0.85                         | 0.99        | 1.39        | 1.08                            | 0.938        |           | R7       | 15.92       | 46.43        | 6.23        | 9.91        | 0.787        |  |
|            | ERAI-RCMs  | Ensemble                   | 1.33                         | 0.80        | 2.24        | 0.91                            | N/A          | ERAI-RCMs | Ensemble | 7.48        | 12.73        | 5.96        | 7.60        | N/A          |  |
|            |            | WRFJ                       | 1.58                         | 1.29        | 2.26        | 1.56                            | 0.940        |           | WRFJ     | 20.65       | 31.54        | 12.38       | 8.75        | 0.798        |  |
|            |            | WRFK                       | 1.37                         | 1.06        | 2.02        | 1.32                            | 0.945        |           | WRFK     | 12.86       | 23.31        | 9.83        | 11.06       | 0.770        |  |
|            |            | WRFL                       | 2.67                         | 0.99        | 5.67        | 1.11                            | 0.880        |           | WRFL     | 7.81        | 15.96        | 7.63        | 9.45        | 0.678        |  |
|            |            | WRFSWWA                    | 1.07                         | 0.92        | 1.33        | 0.89                            | 0.952        |           | WRFSWWA  | 9.81        | 16.82        | 7.75        | 20.94       | 0.806        |  |
|            |            | CCAM                       | 0.98                         | 0.97        | 1.57        | 1.44                            | 0.904        |           | CCAM     | 10.39       | 22.85        | 9.17        | 15.77       | 0.837        |  |
| CCLM       | 0.92       | 0.94                       | 1.21                         | 1.37        | 0.946       | CCLM                            | 11.66        | 24.05     | 5.61     | 17.69       | 0.798        |             |             |              |  |
| tasmin (K) | ERA5-RCMs  | Ensemble                   | 0.73                         | 0.89        | 0.96        | 1.48                            | N/A          | ERA5-RCMs | Ensemble | 7.48        | 12.73        | 5.96        | 7.60        | N/A          |  |
|            |            | R1                         | 0.95                         | 1.12        | 0.85        | 1.30                            | 0.943        |           | R1       | 13.48       | 27.82        | 5.17        | 20.02       | 0.773        |  |
|            |            | R2                         | <b>0.77</b>                  | 1.03        | <b>0.70</b> | <b>1.02</b>                     | 0.935        |           | R2       | 11.33       | 22.79        | 5.06        | 14.83       | <b>0.817</b> |  |
|            |            | R3                         | <b>0.77</b>                  | 1.02        | 0.96        | 1.47                            | 0.938        |           | R3       | 8.31        | 19.72        | <b>5.02</b> | 9.80        | 0.805        |  |
|            |            | R4                         | 0.81                         | <b>0.73</b> | 1.23        | 1.90                            | <b>0.944</b> |           | R4       | <b>7.46</b> | <b>16.33</b> | 5.67        | <b>9.21</b> | 0.801        |  |
|            |            | R5                         | 0.93                         | 1.22        | 1.07        | 1.55                            | 0.937        |           | R5       | 12.59       | 33.93        | 5.21        | 11.40       | 0.814        |  |
|            |            | R6                         | 0.89                         | 1.23        | 1.24        | 1.69                            | 0.933        |           | R6       | 16.29       | 49.29        | 6.16        | 10.25       | 0.787        |  |
|            |            | R7                         | 0.89                         | 0.99        | 1.41        | 1.97                            | 0.930        |           | R7       | 15.92       | 46.43        | 6.23        | 9.91        | 0.787        |  |
|            | ERAI-RCMs  | Ensemble                   | 0.73                         | 0.69        | 0.76        | 1.01                            | N/A          | ERAI-RCMs | Ensemble | 7.48        | 12.73        | 5.96        | 7.60        | N/A          |  |
|            |            | WRFJ                       | 0.63                         | 0.69        | 0.76        | 0.96                            | 0.976        |           | WRFJ     | 20.65       | 31.54        | 12.38       | 8.75        | 0.798        |  |
|            |            | WRFK                       | 0.70                         | 0.72        | 0.78        | 0.96                            | 0.975        |           | WRFK     | 12.86       | 23.31        | 9.83        | 11.06       | 0.770        |  |
|            |            | WRFL                       | 1.47                         | 0.78        | 2.80        | 2.86                            | 0.915        |           | WRFL     | 7.81        | 15.96        | 7.63        | 9.45        | 0.678        |  |
|            |            | WRFSWWA                    | 1.75                         | 1.78        | 1.68        | 2.15                            | 0.912        |           | WRFSWWA  | 9.81        | 16.82        | 7.75        | 20.94       | 0.806        |  |
|            |            | CCAM                       | 1.07                         | 0.59        | 1.82        | 1.50                            | 0.945        |           | CCAM     | 10.39       | 22.85        | 9.17        | 15.77       | 0.837        |  |
| CCLM       | 2.25       | 1.75                       | 2.75                         | 3.33        | 0.900       | CCLM                            | 11.66        | 24.05     | 5.61     | 17.69       | 0.798        |             |             |              |  |

### Eastern Australia

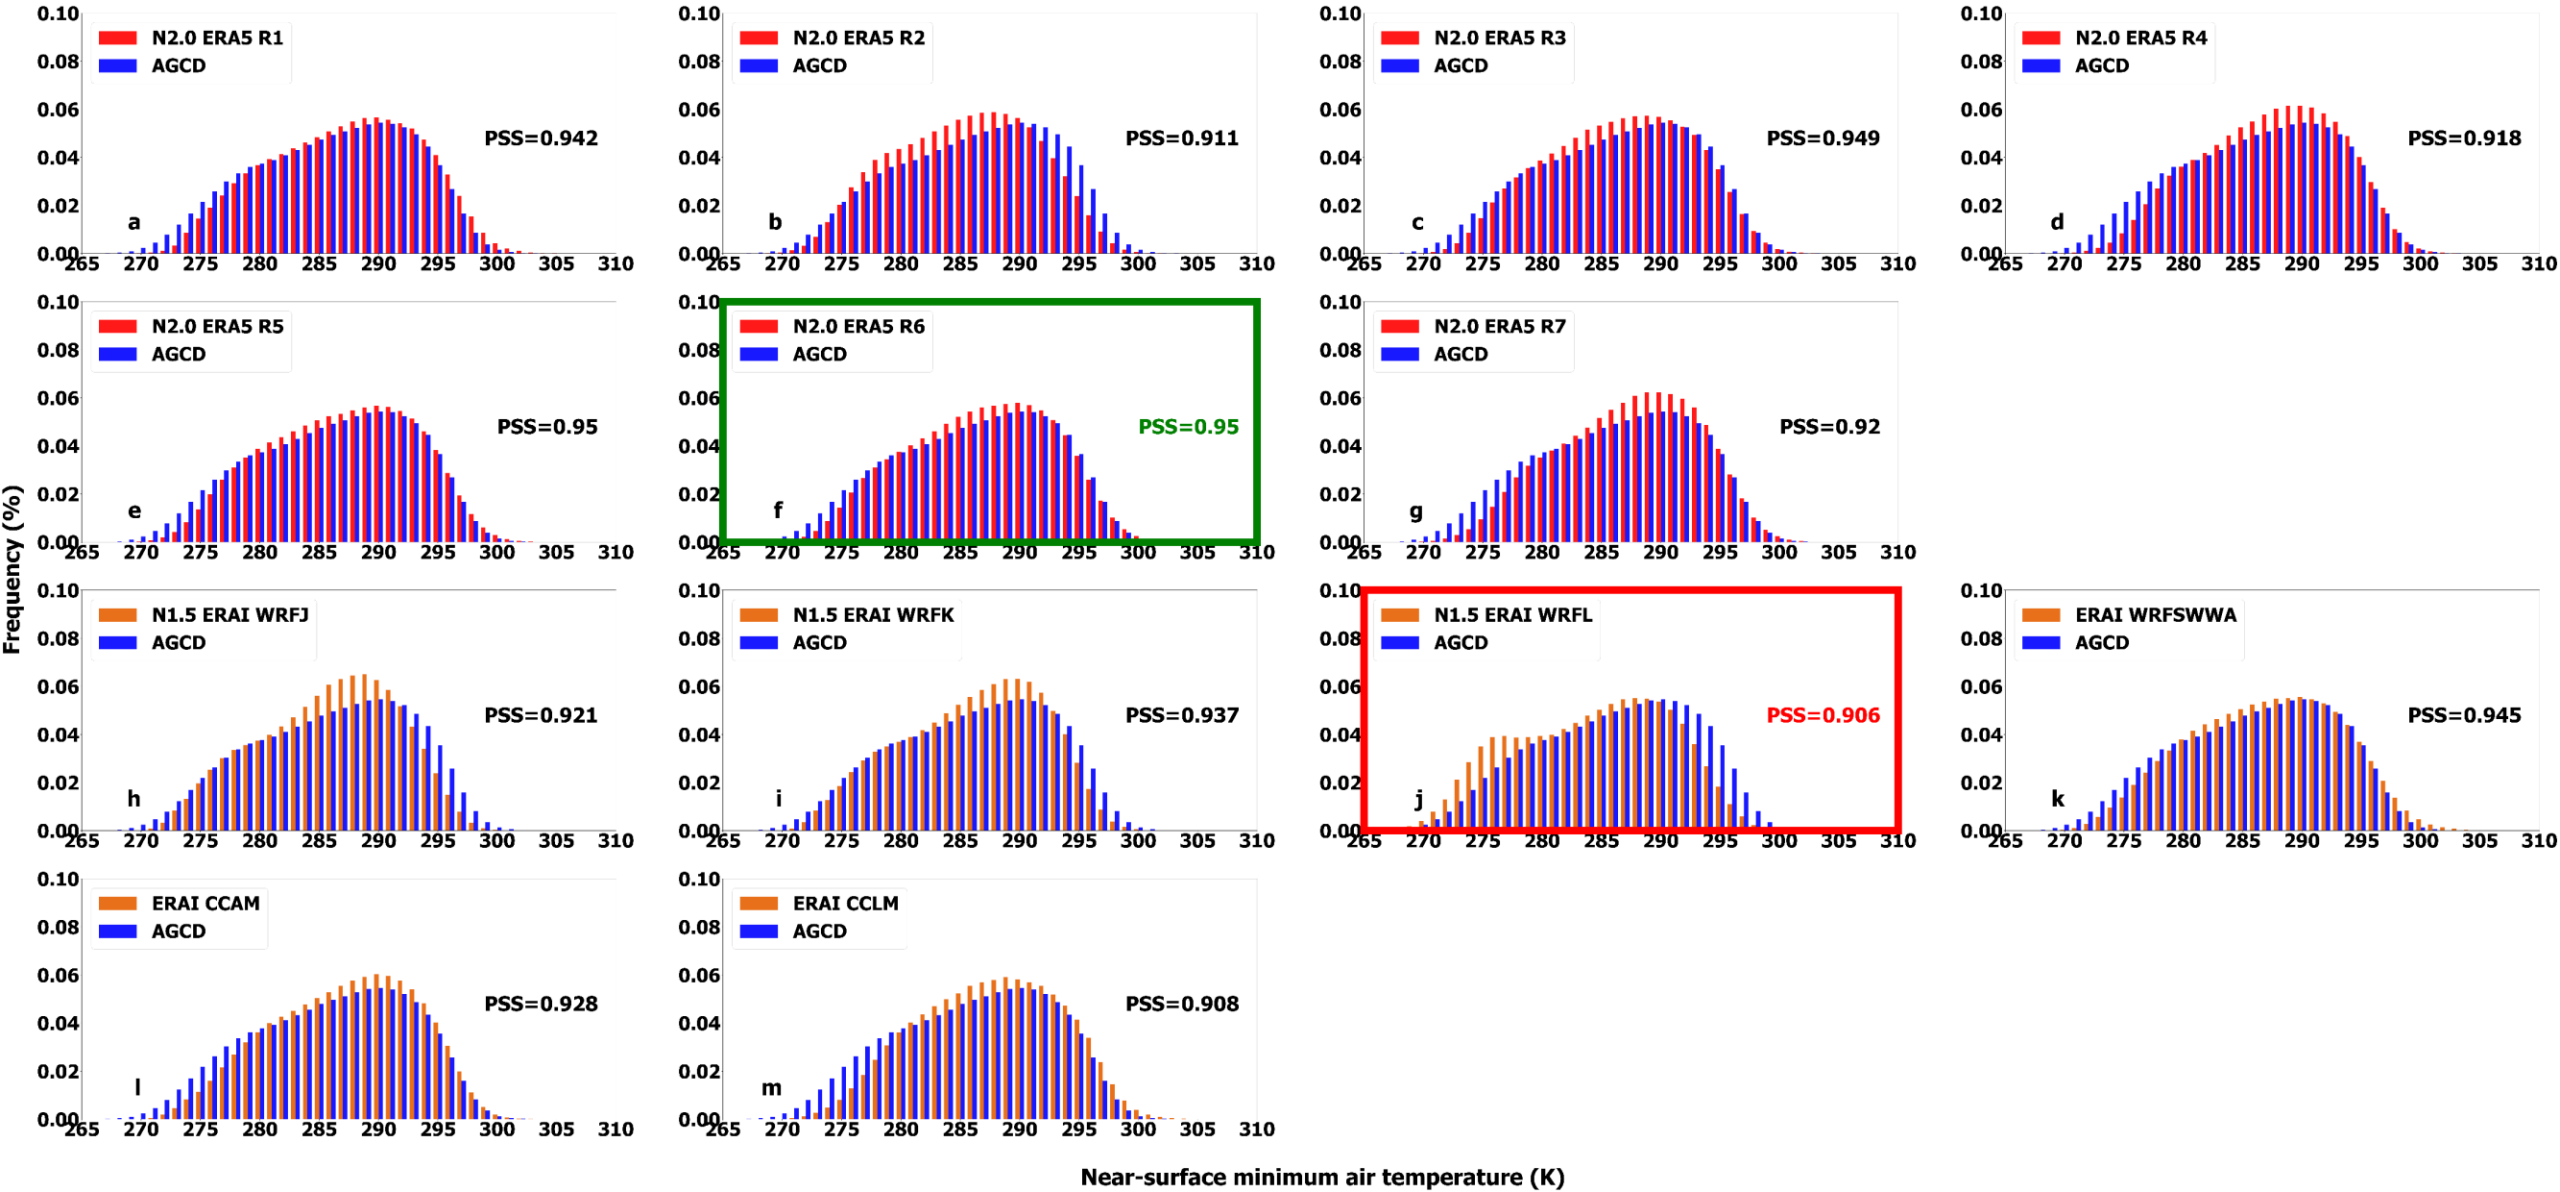

**Fig. S9** Probability density functions of daily minimum near-surface air temperature (K) with bin width of 1 K in the Eastern Australia Natural Resource Management (NRM) region.

### Southern Australia

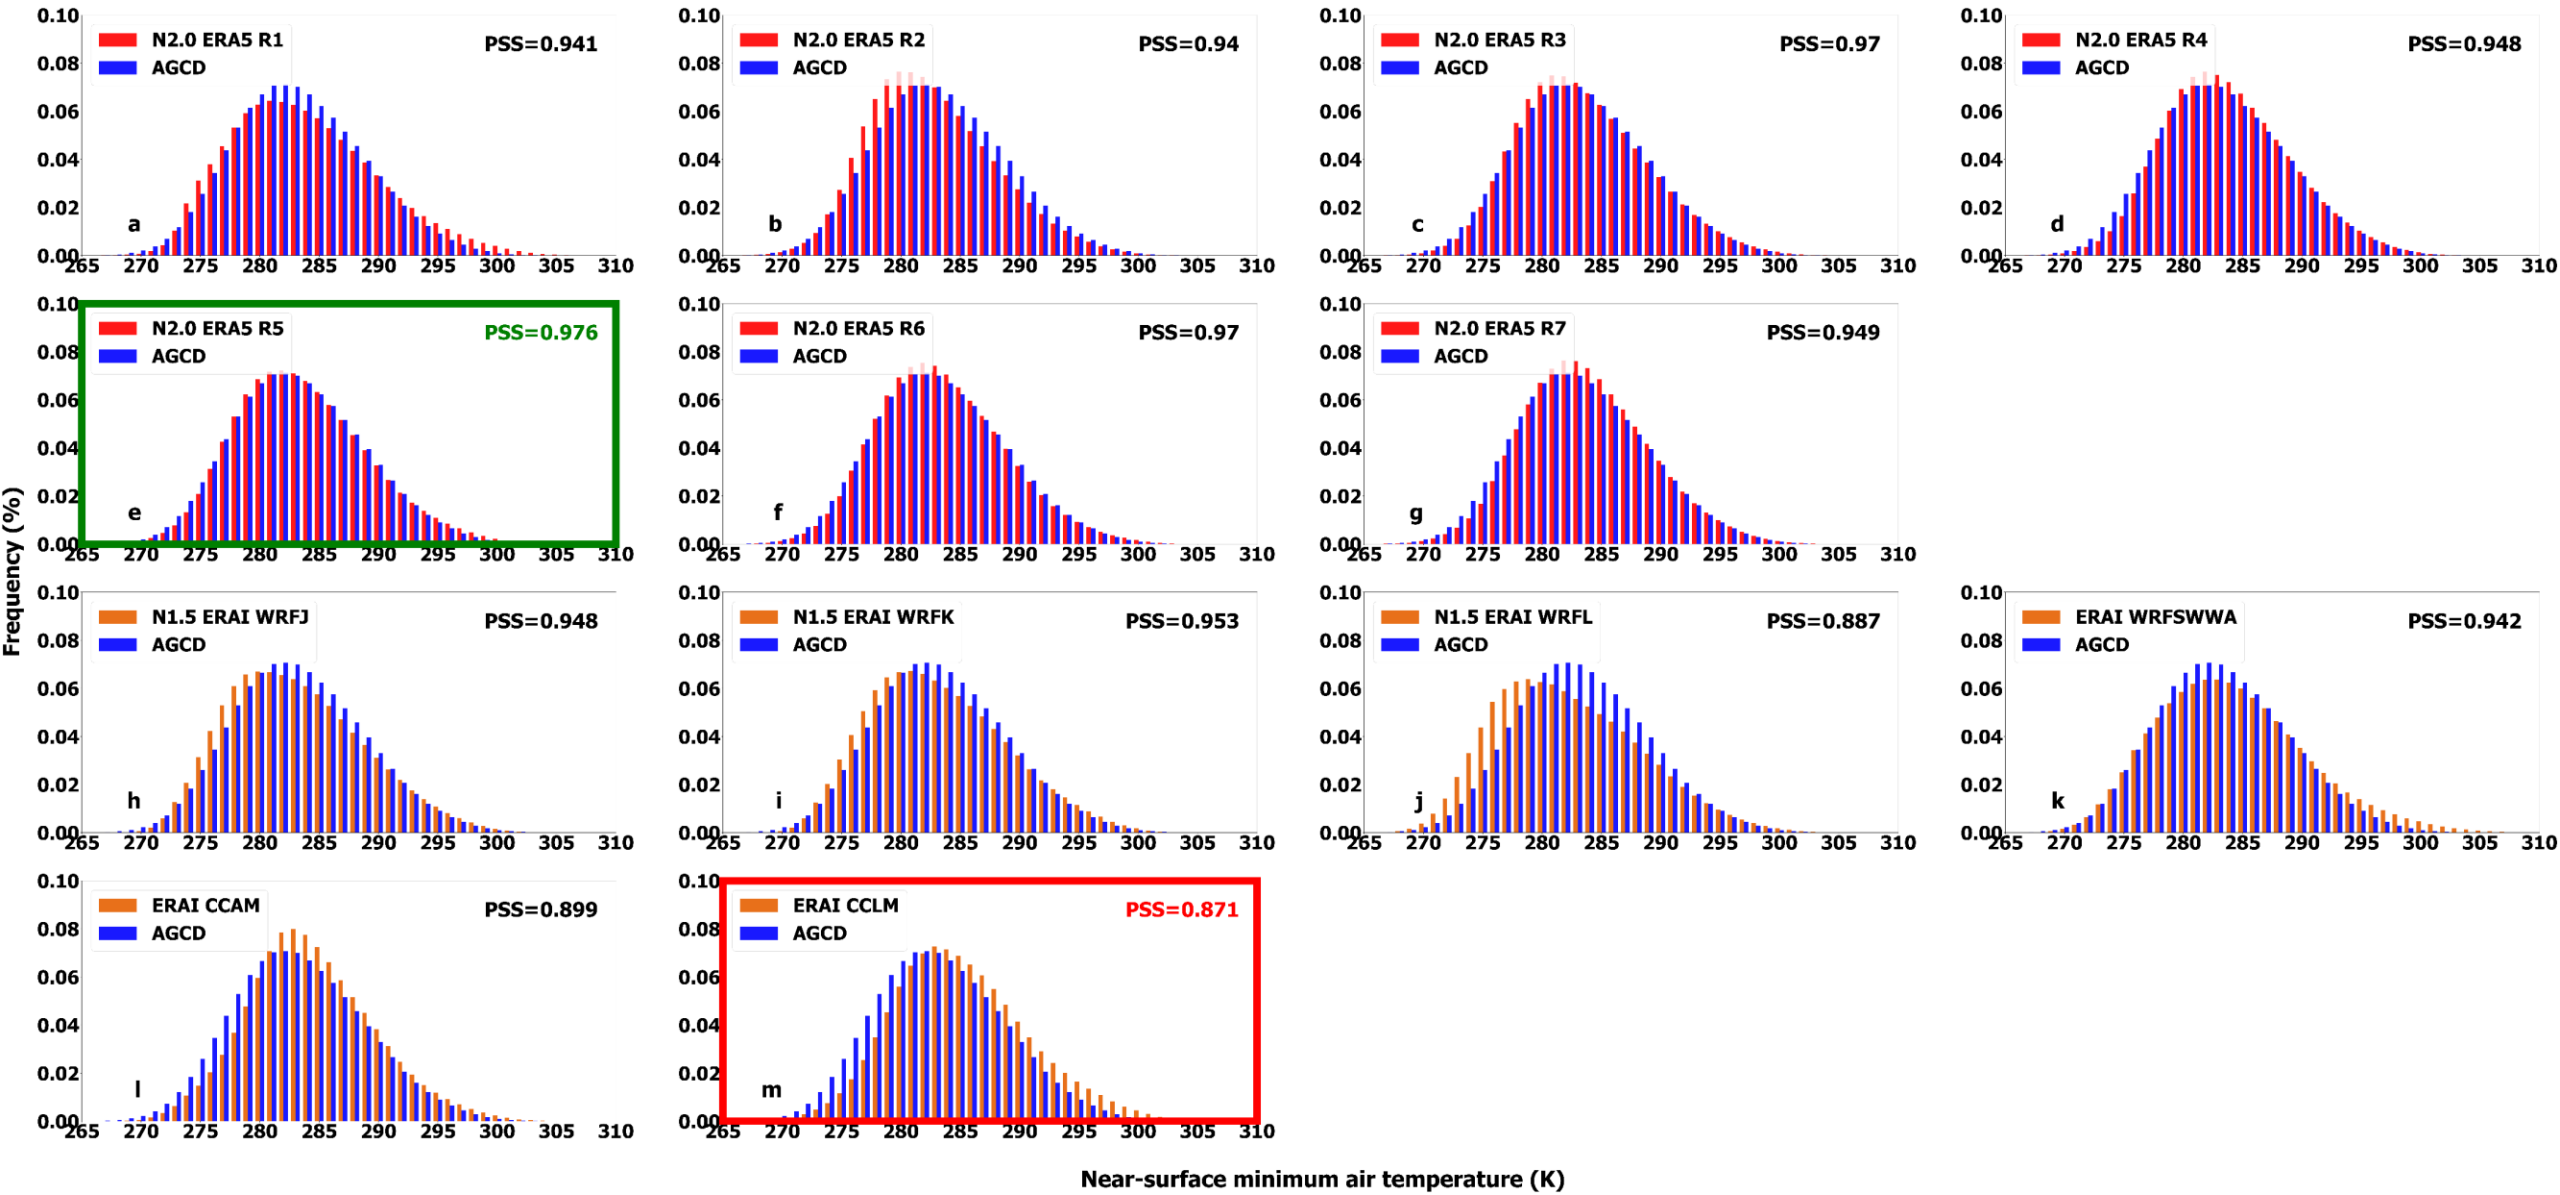

**Fig. S10** Probability density functions of daily minimum near-surface air temperature (K) with bin width of 1 K in the Southern Australia Natural Resource Management (NRM) region.

### Rangelands

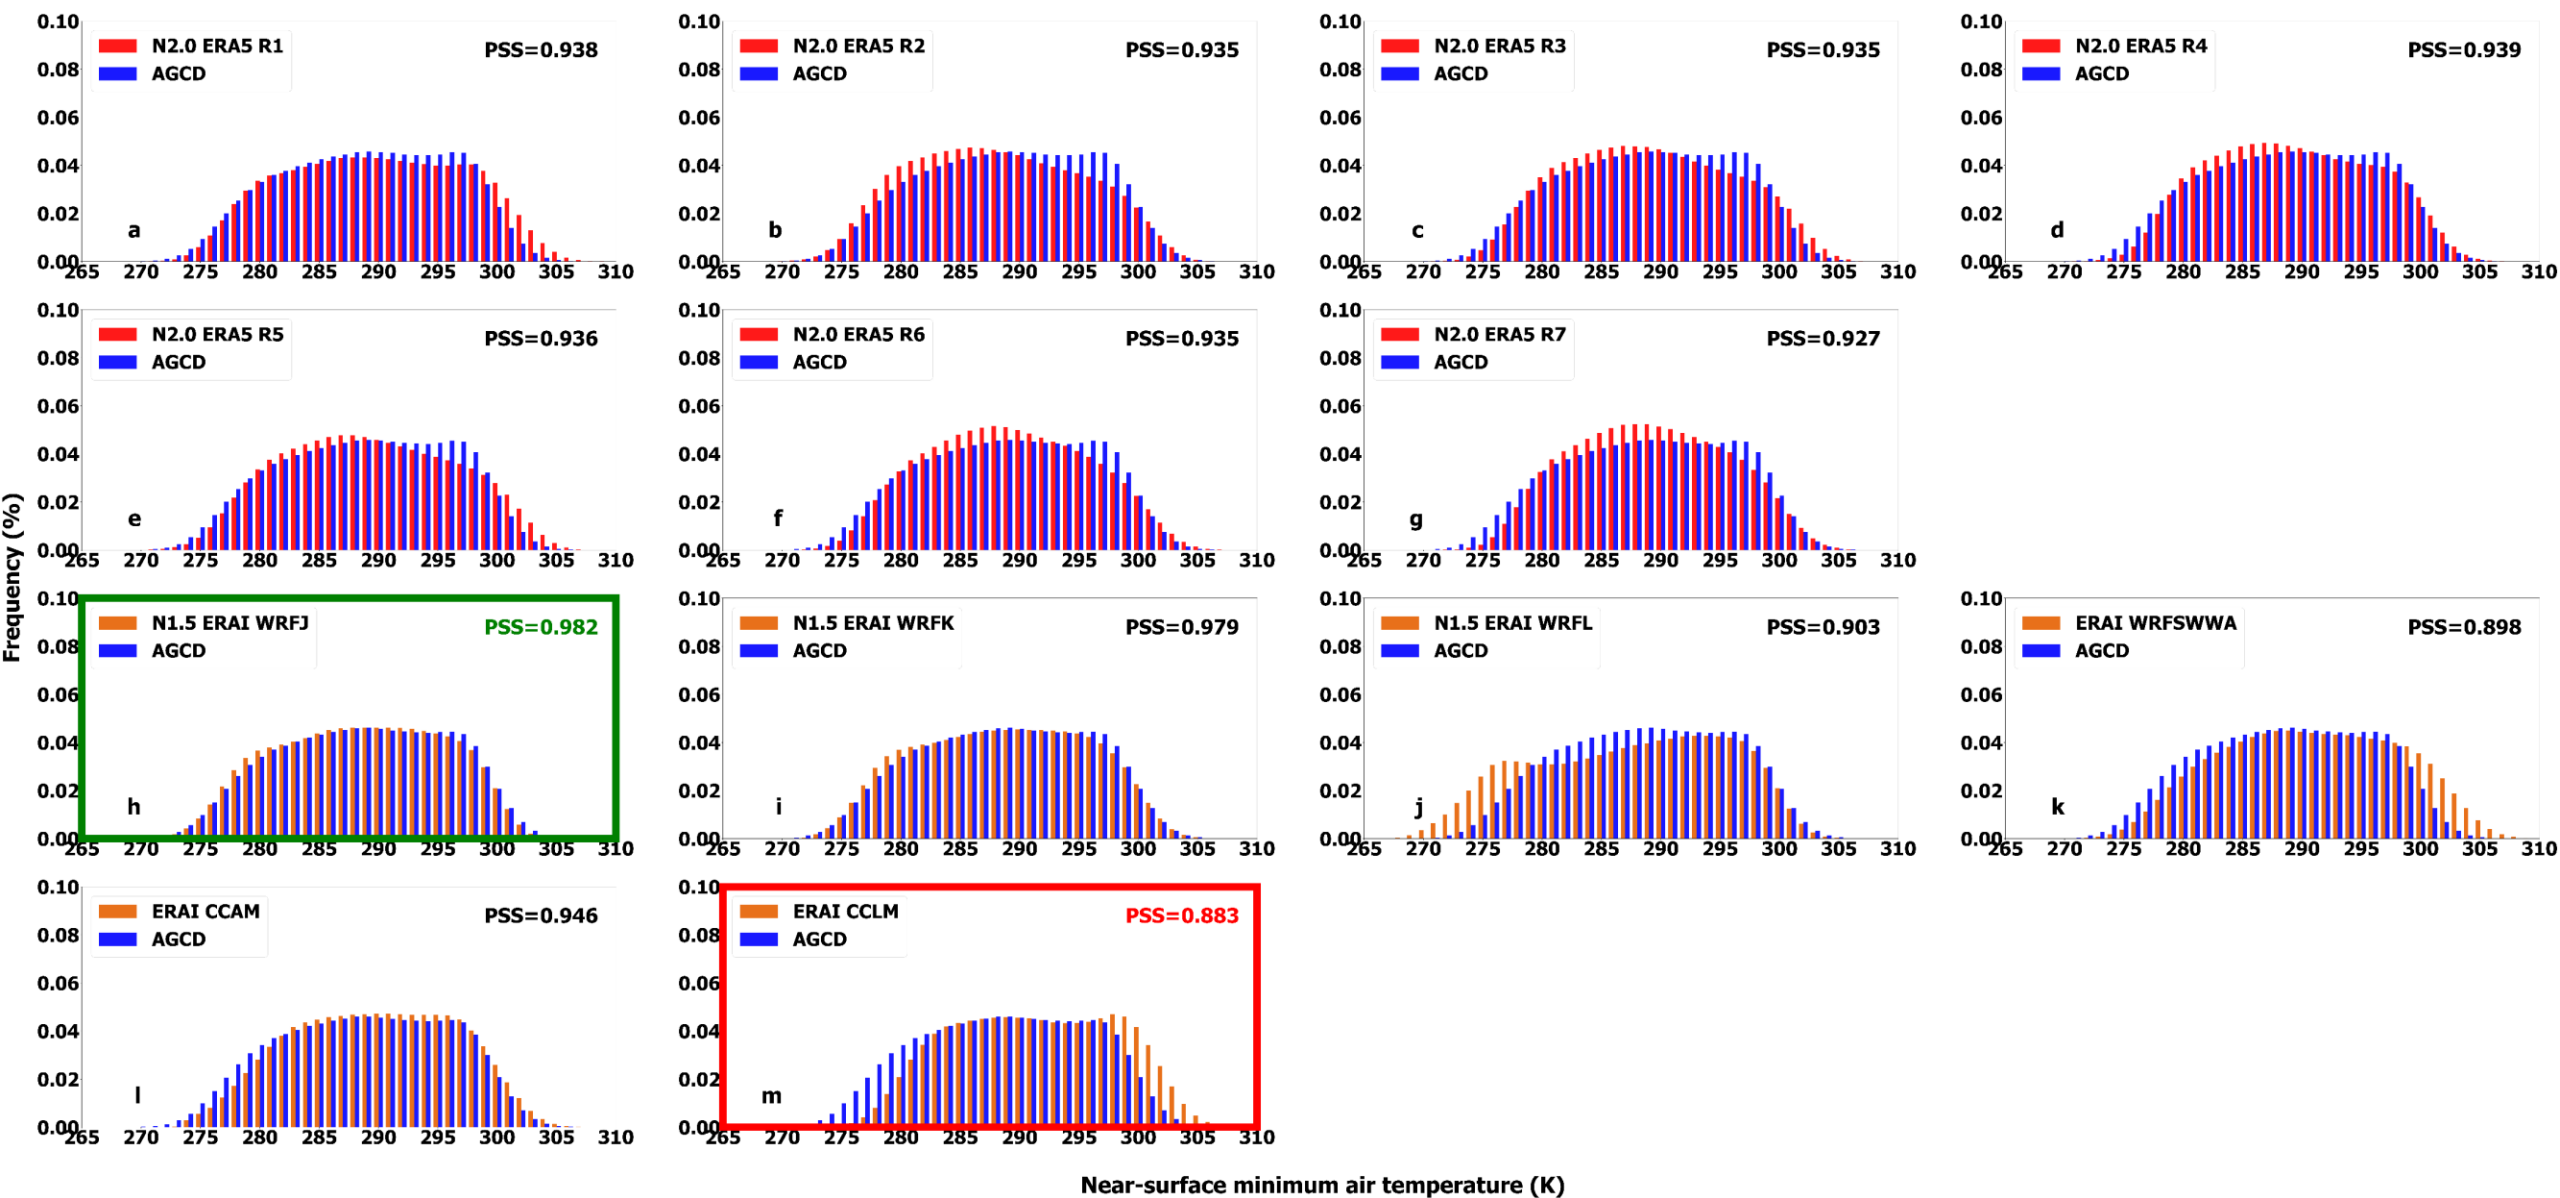

**Fig. S11** Probability density functions of daily minimum near-surface air temperature (K) with bin width of 1 K in the Rangelands Natural Resource Management (NRM) region.

### Northern Australia

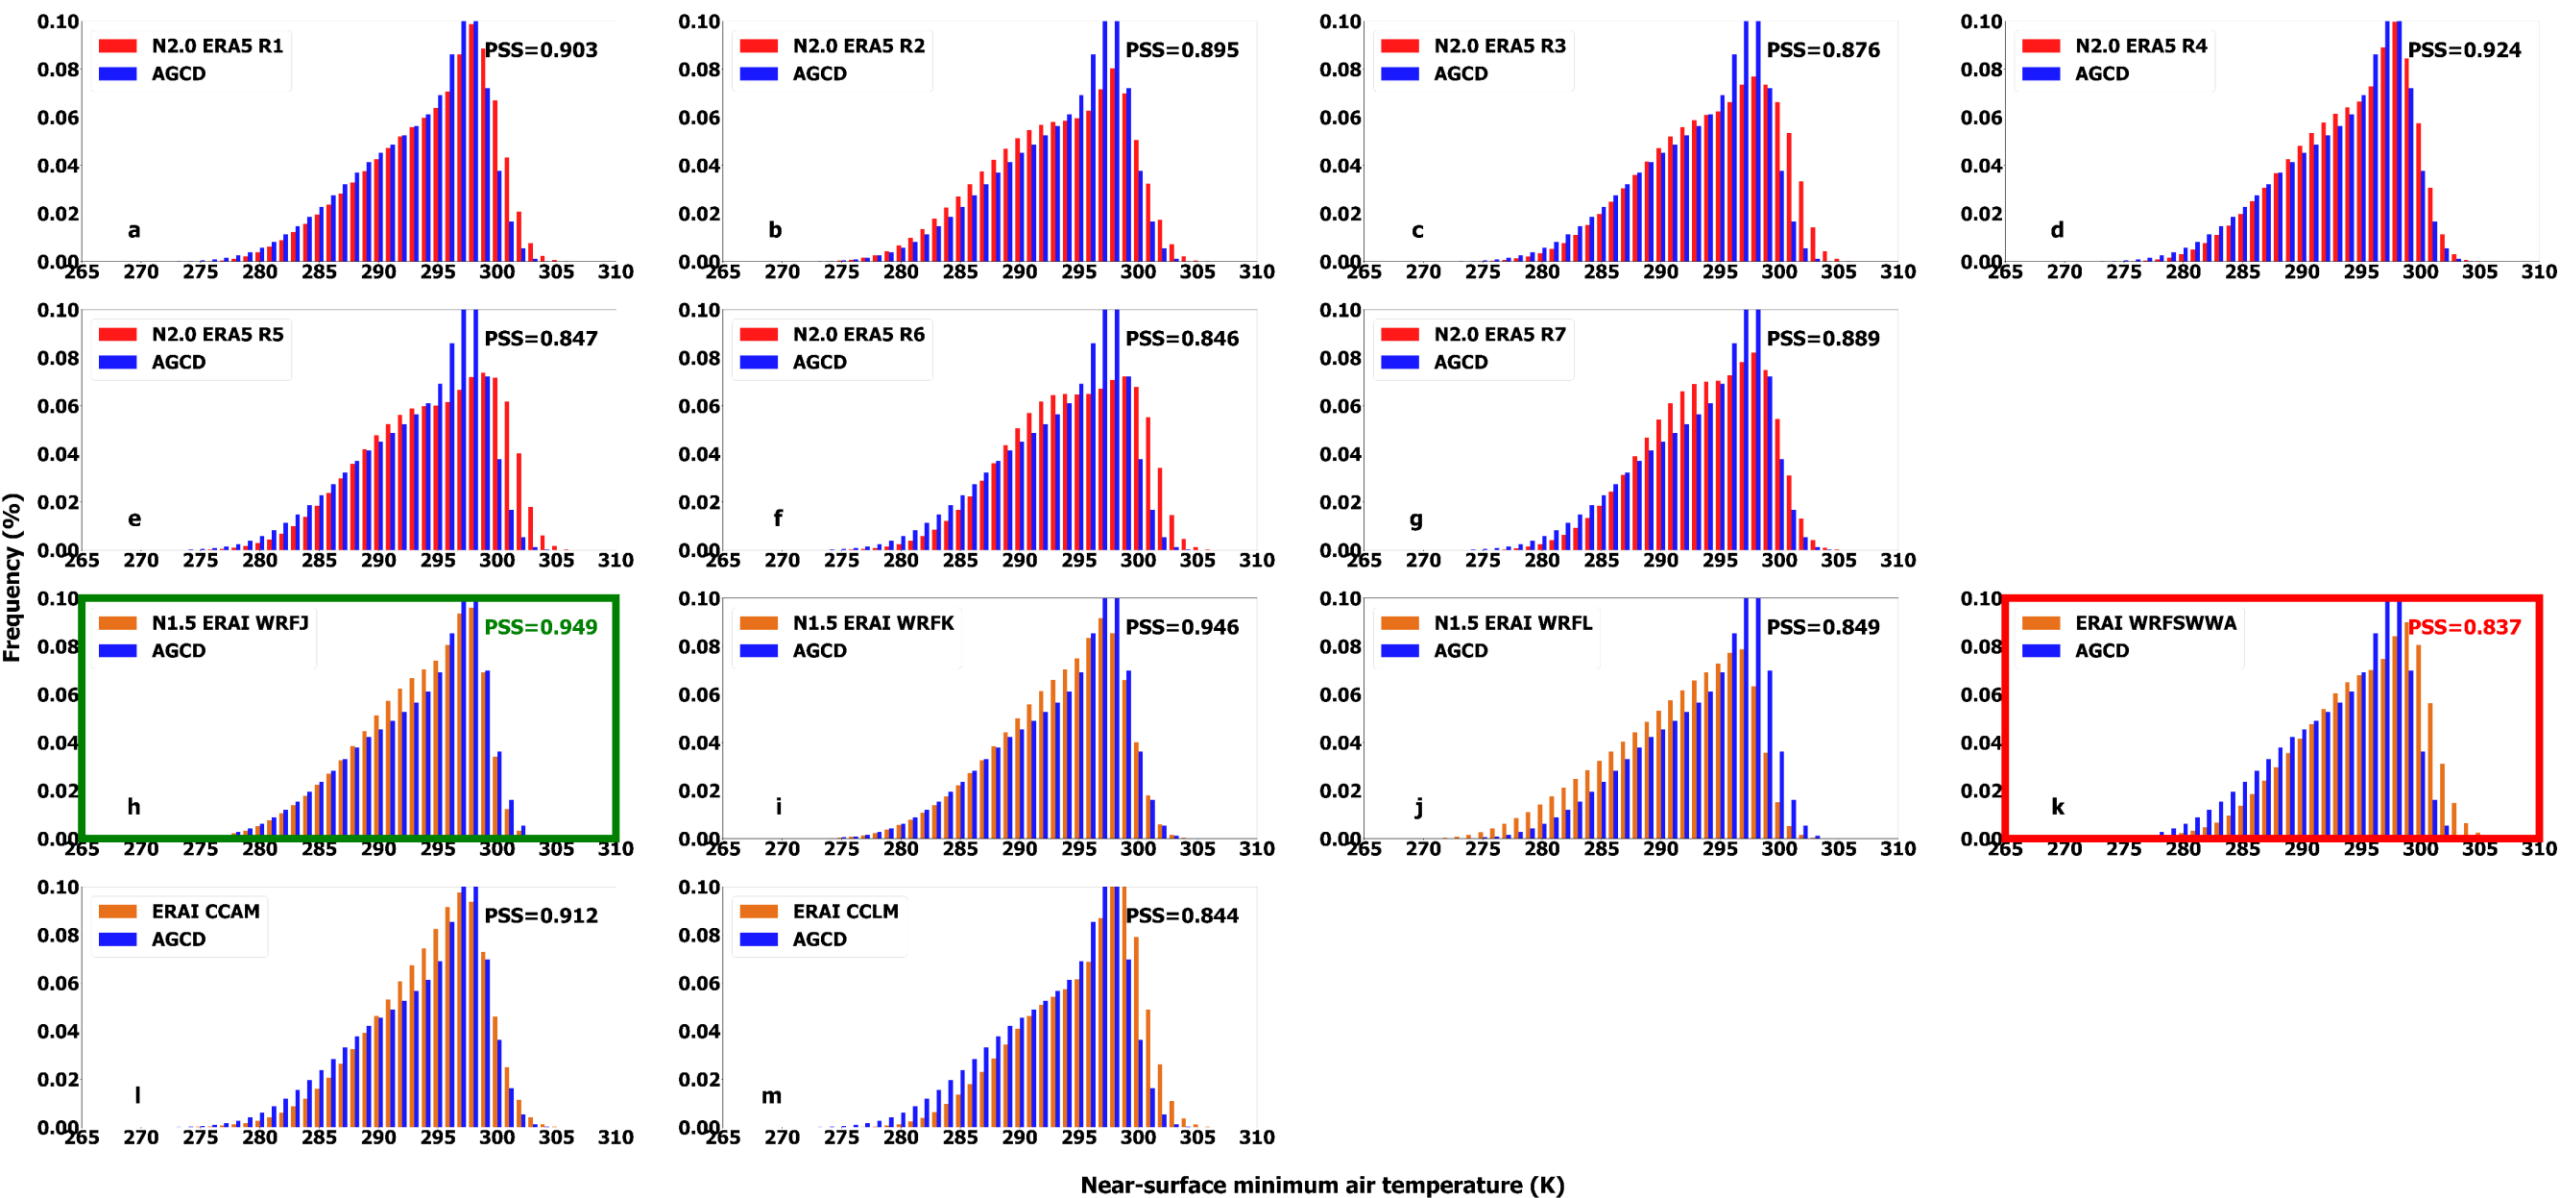

**Fig. S12** Probability density functions of daily minimum near-surface air temperature (K) with bin width of 1 K in the Northern Australia Natural Resource Management (NRM) region.

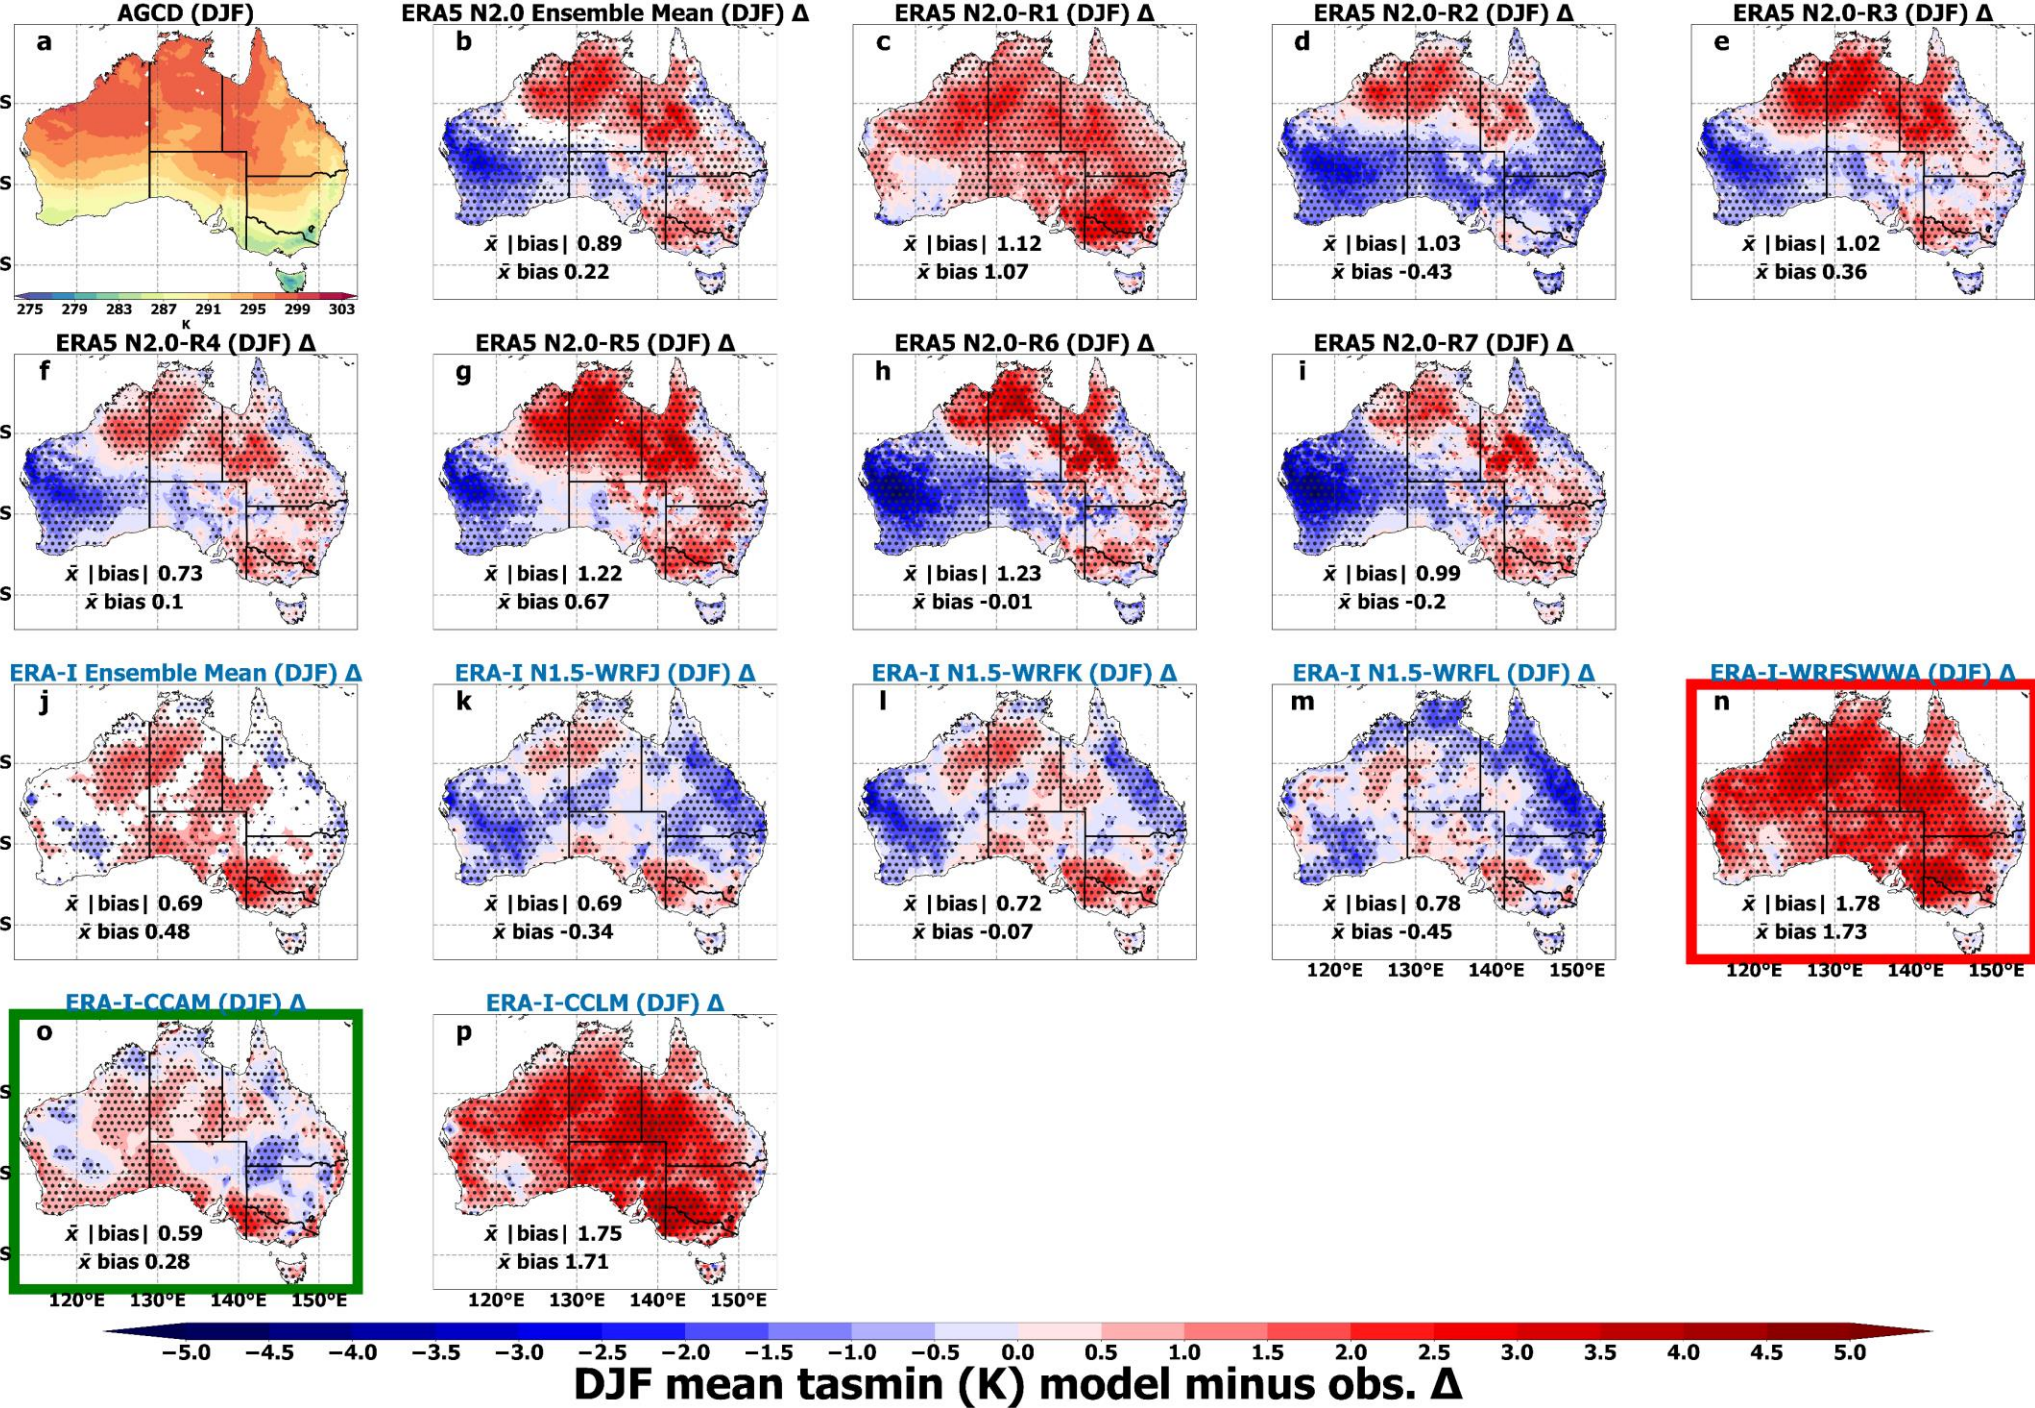

**Fig. S13** Summer (DJF) minimum temperature bias with respect to gridded observations with stippling and panel boundaries as per Fig. S5.





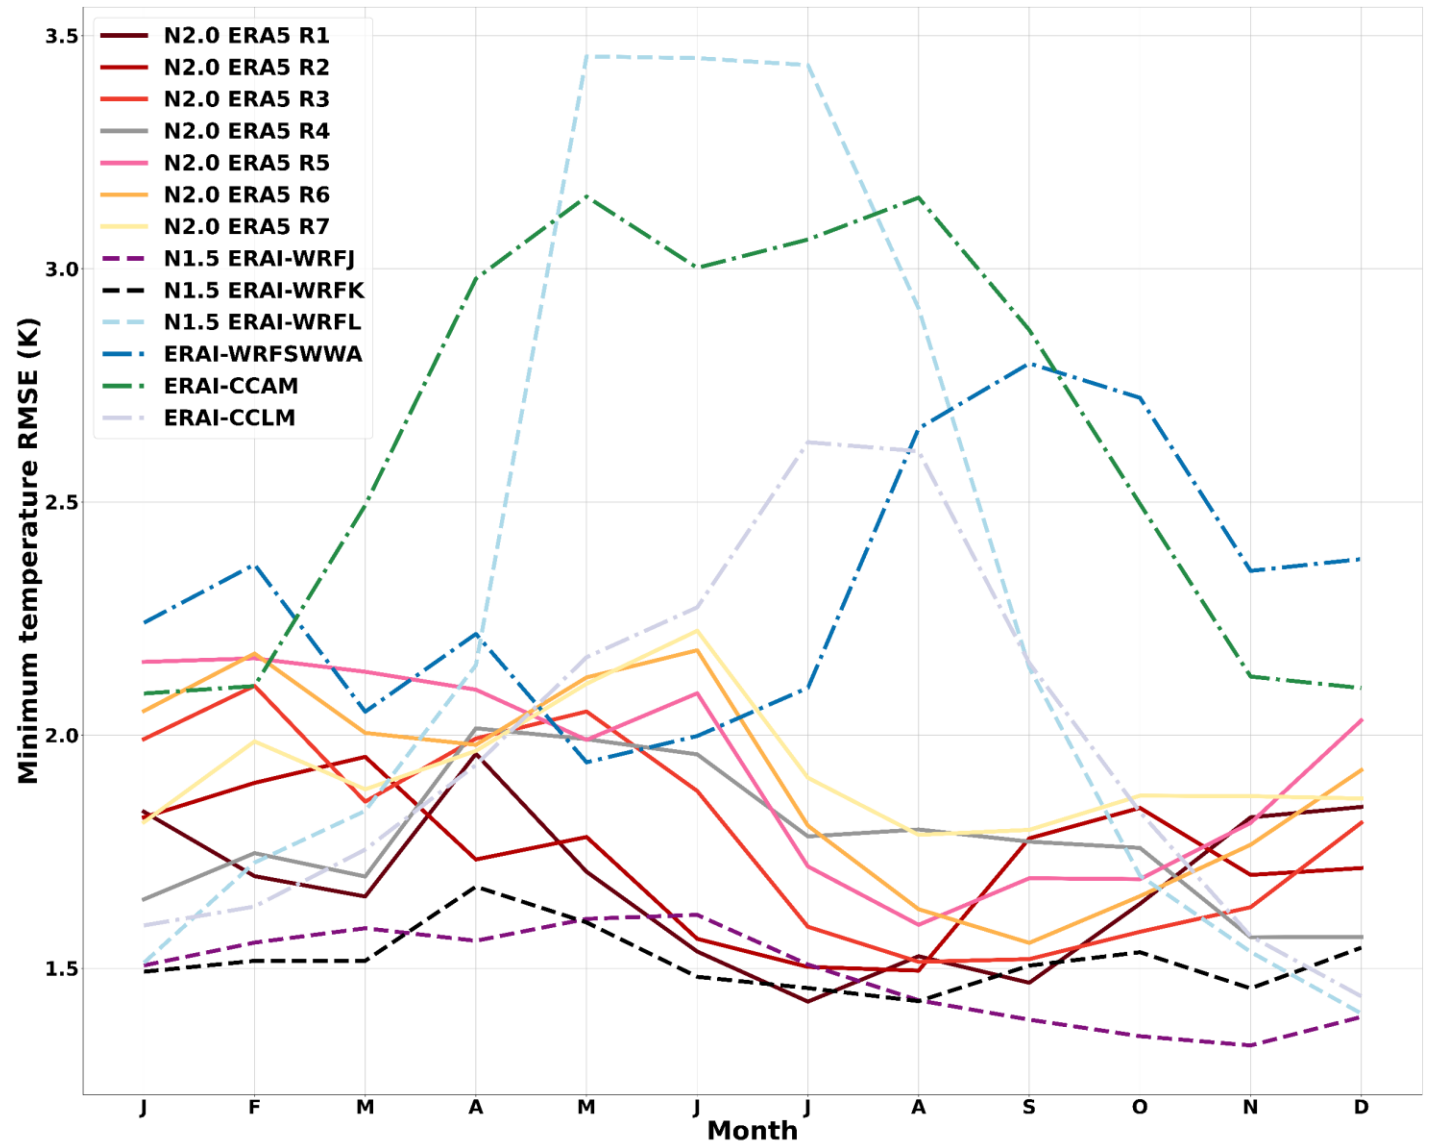

**Fig. S15** RMSE annual cycle for historical minimum near surface temperature (K) as simulated over Australia by the ERA5-forced and ERA-Interim-forced RCMs.

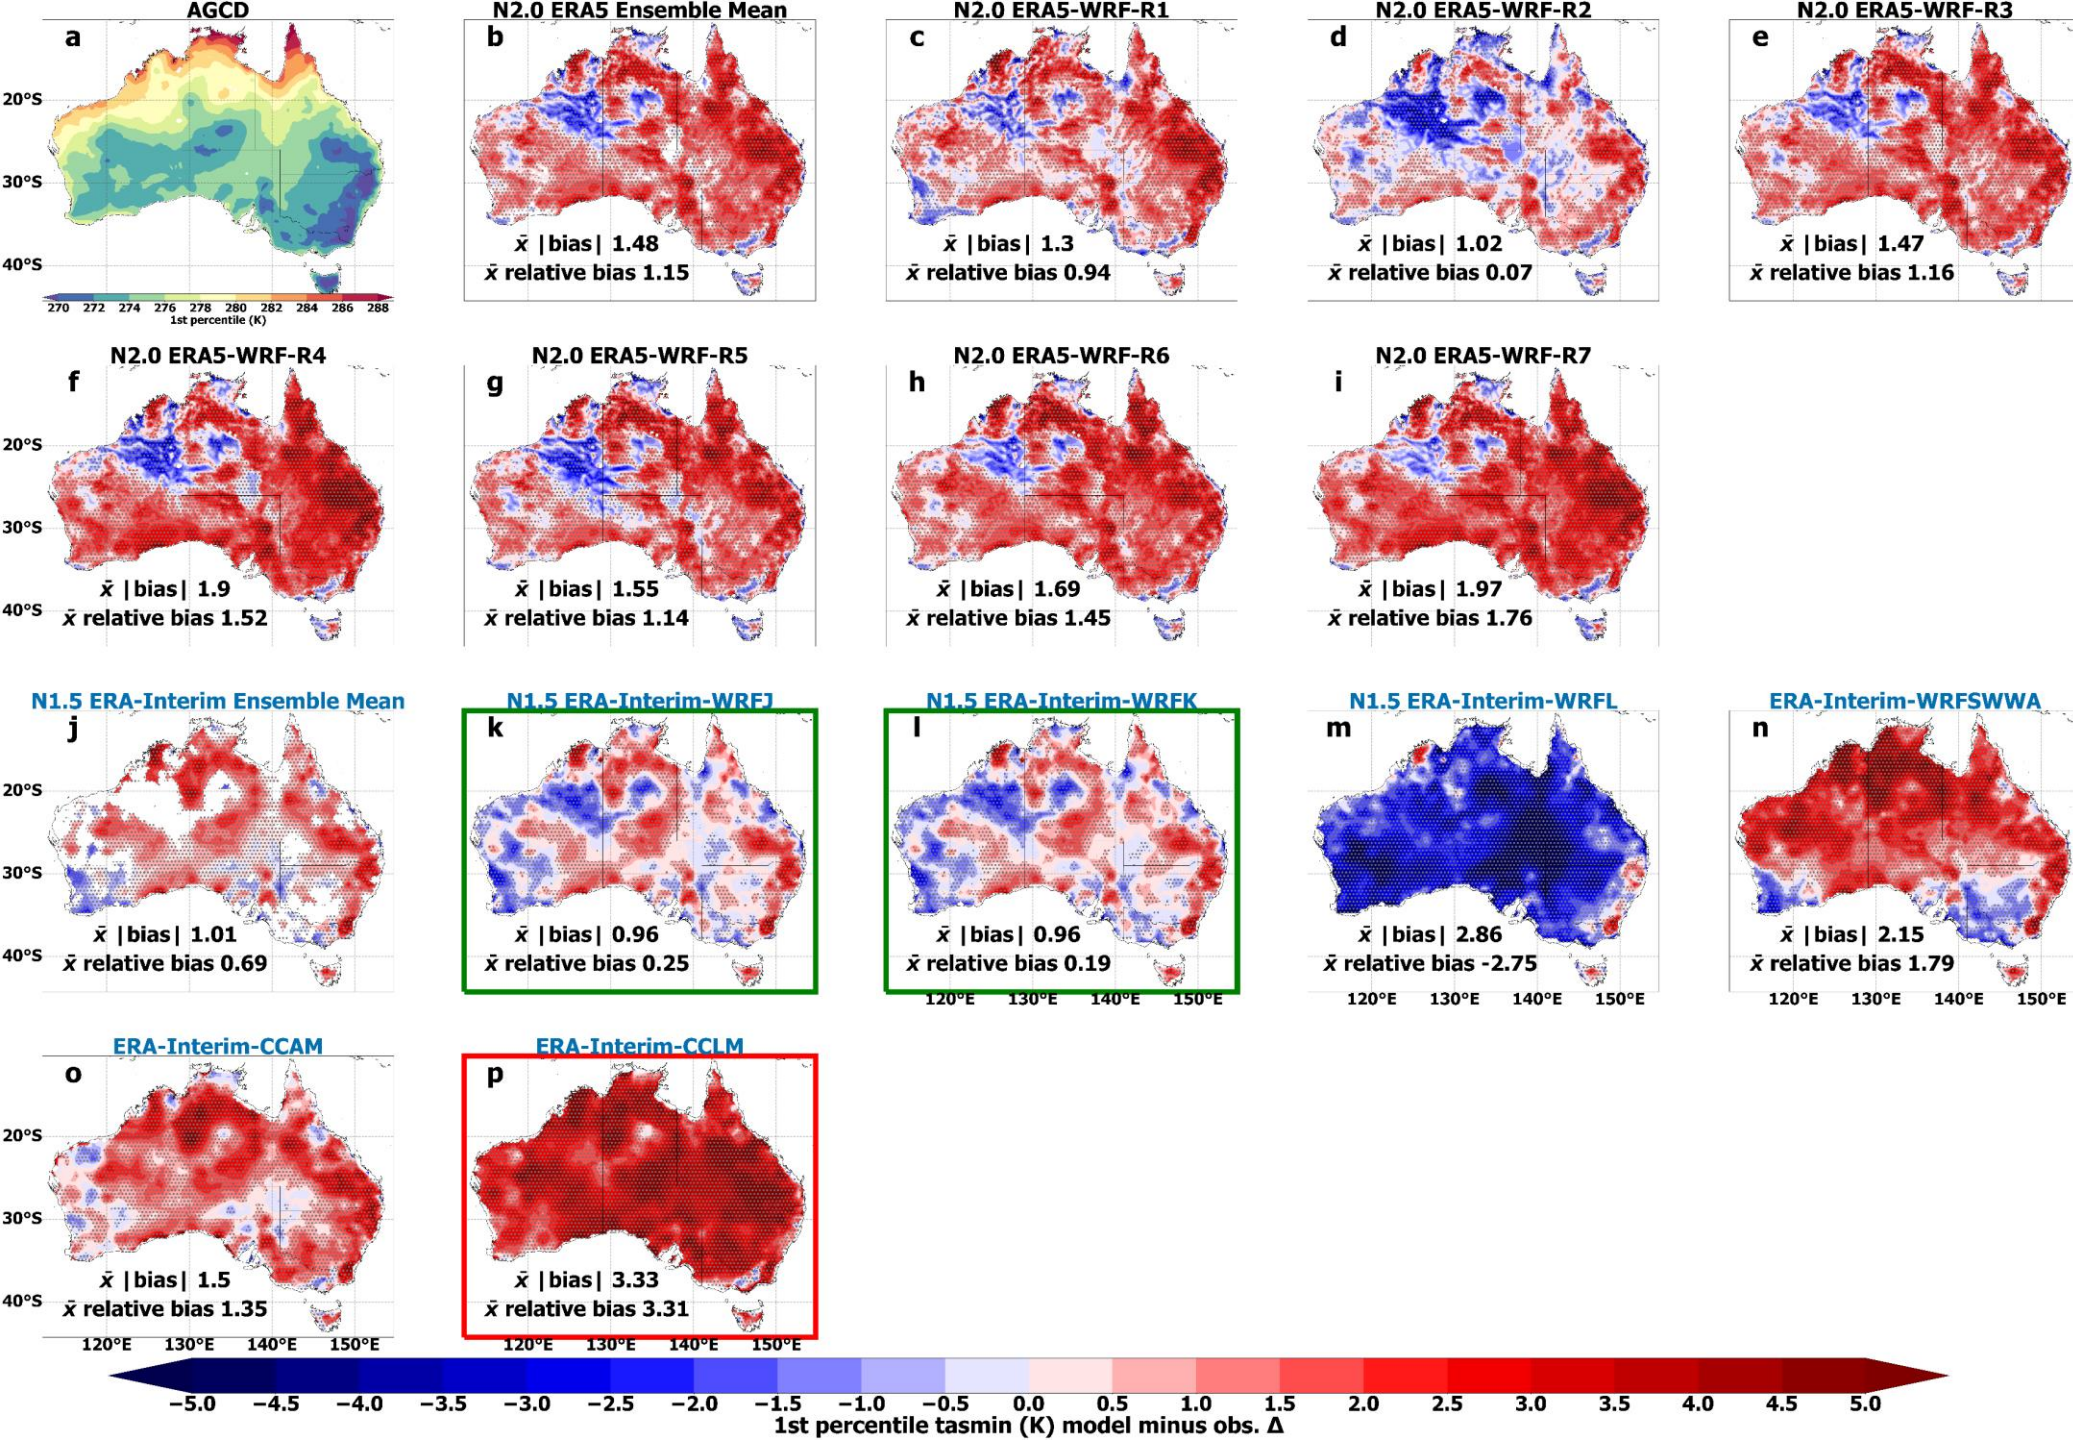

**Fig. S16** Biases in 1<sup>st</sup> percentile minimum temperatures simulated by the ERA5 and ERA-Interim forced RCMs relative to AGCD gridded observations with stippling and panel boundary colouring as per Fig. S5.

### Eastern Australia

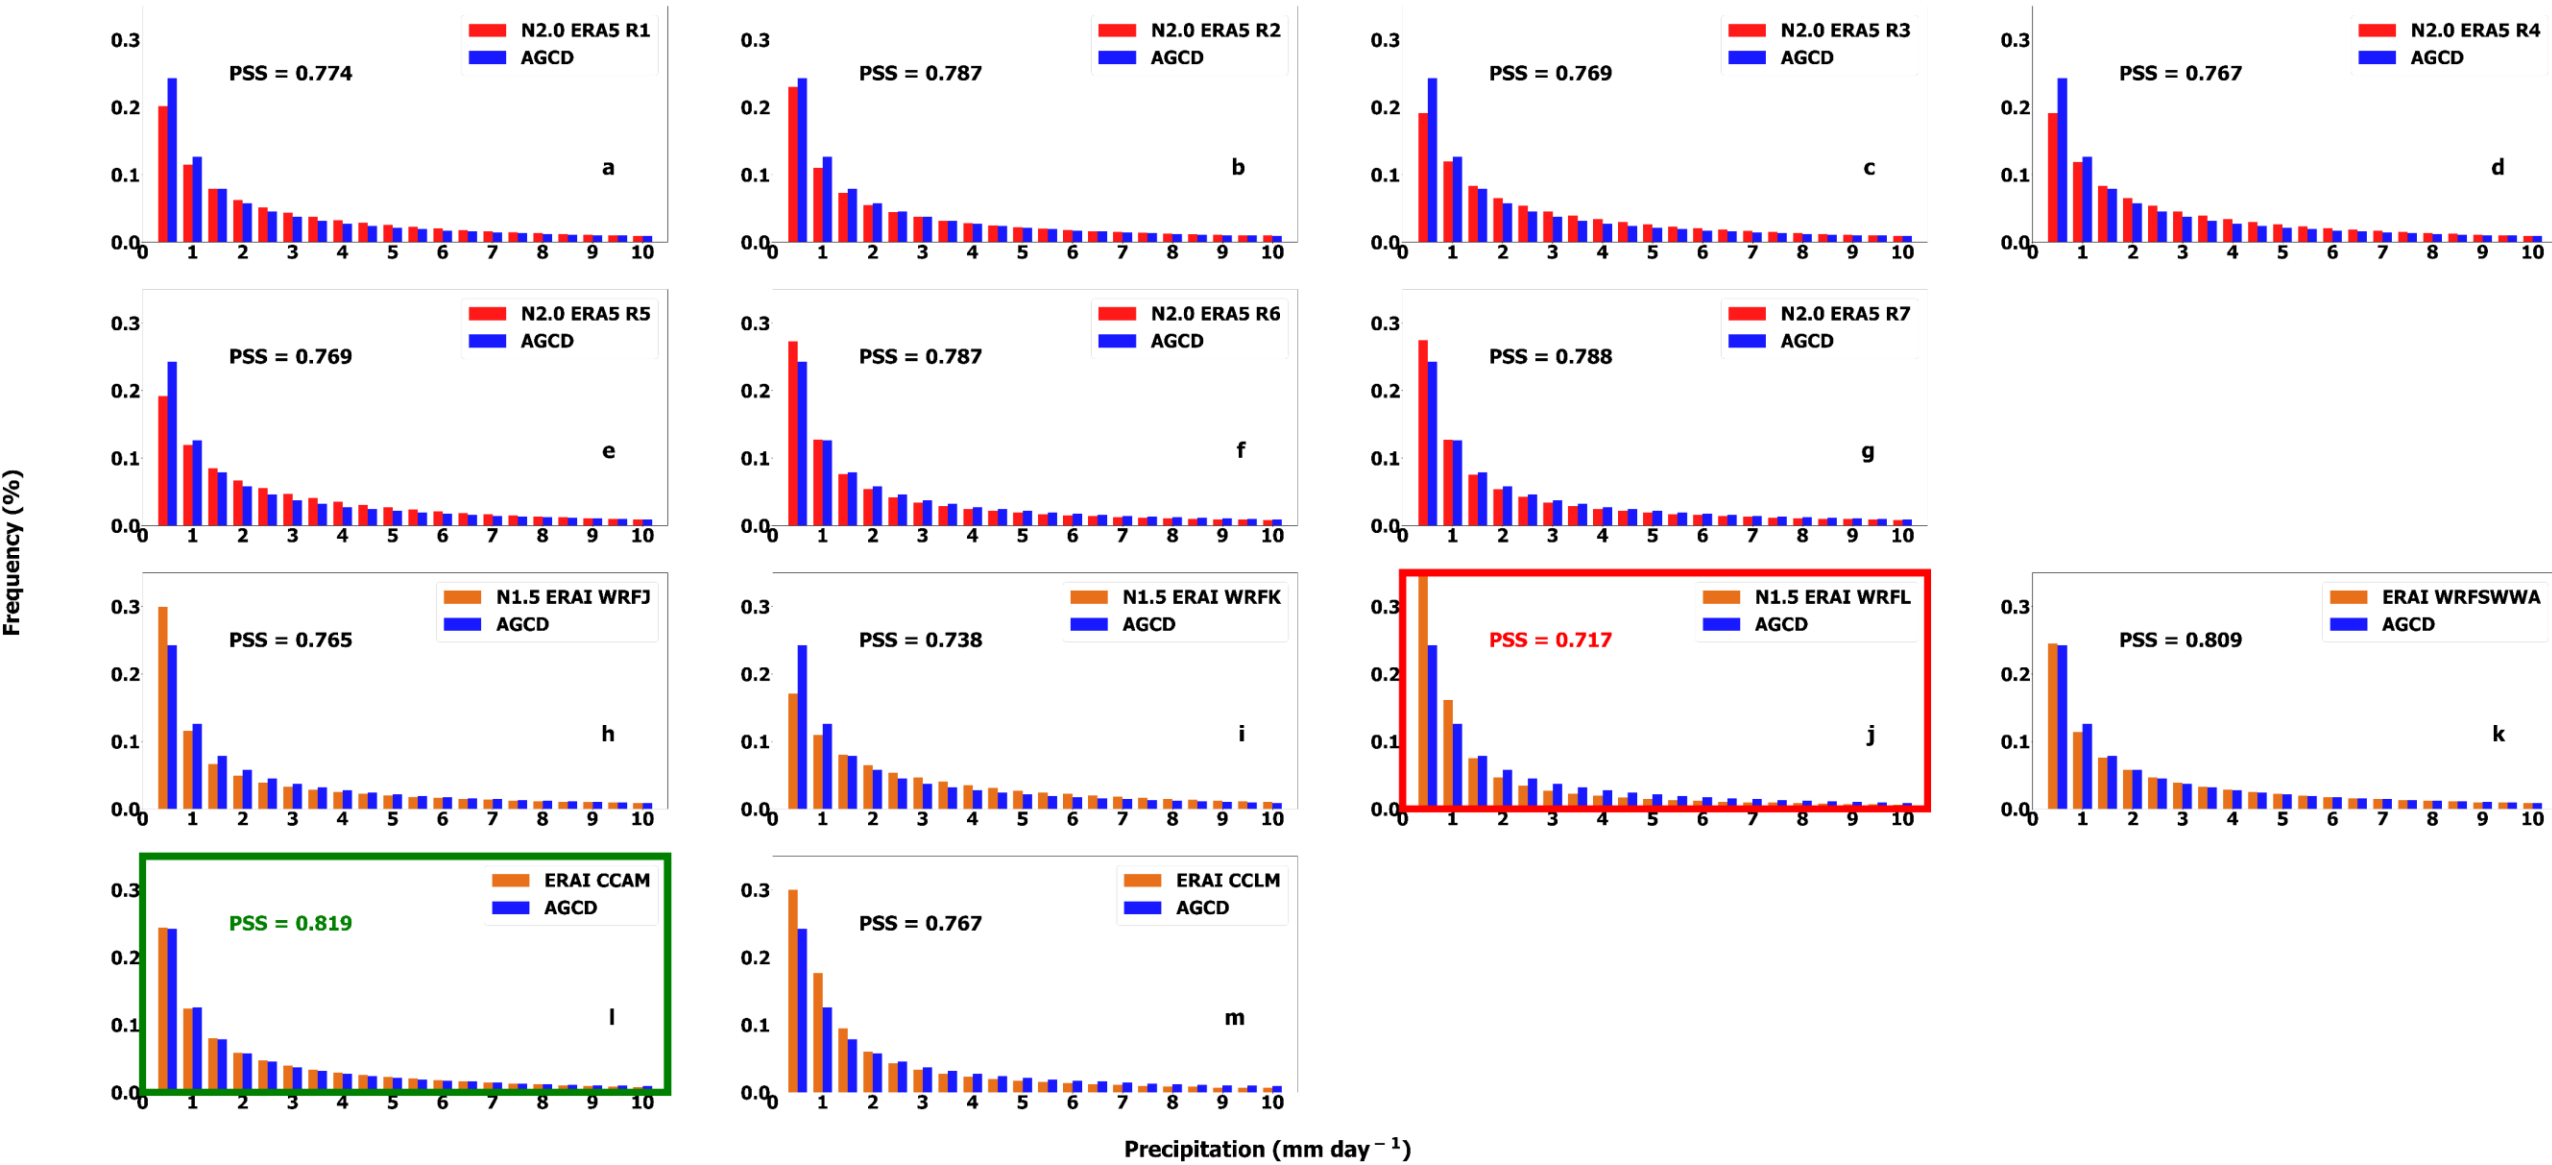

**Fig. S17** Probability density functions of daily precipitation (mm day<sup>-1</sup>) with bin width of 0.5 mm in the Eastern Australia Natural Resource Management (NRM) region.

### Southern Australia

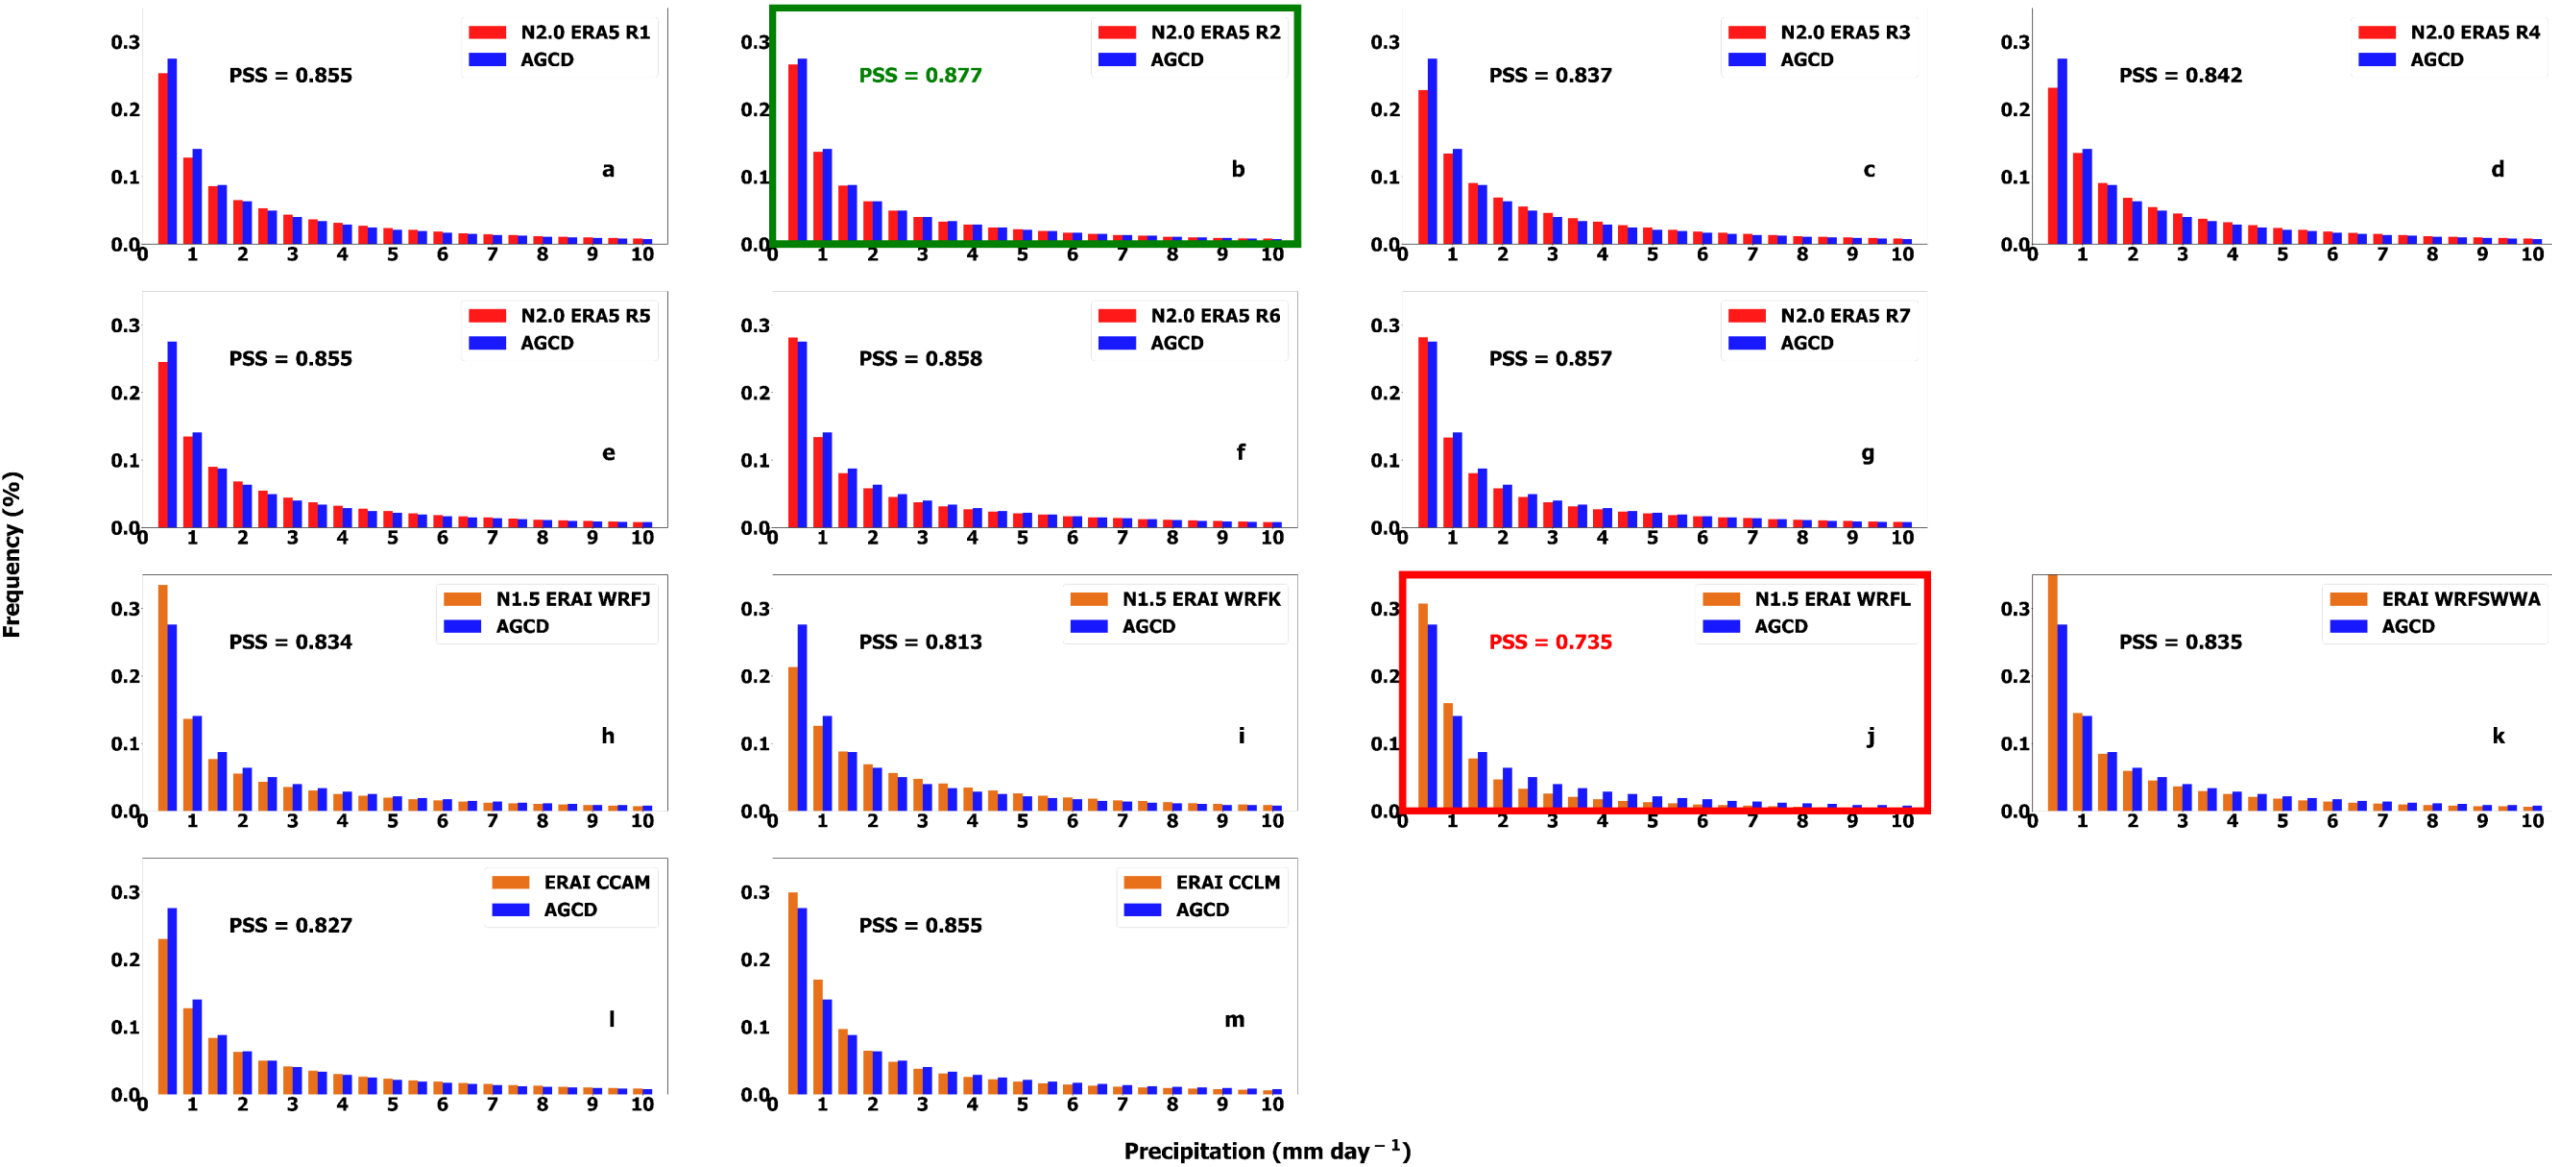

**Fig. S18** Probability density functions of daily precipitation (mm day<sup>-1</sup>) with bin width of 0.5 mm in the Southern Australia Natural Resource Management (NRM) region.

### Rangelands

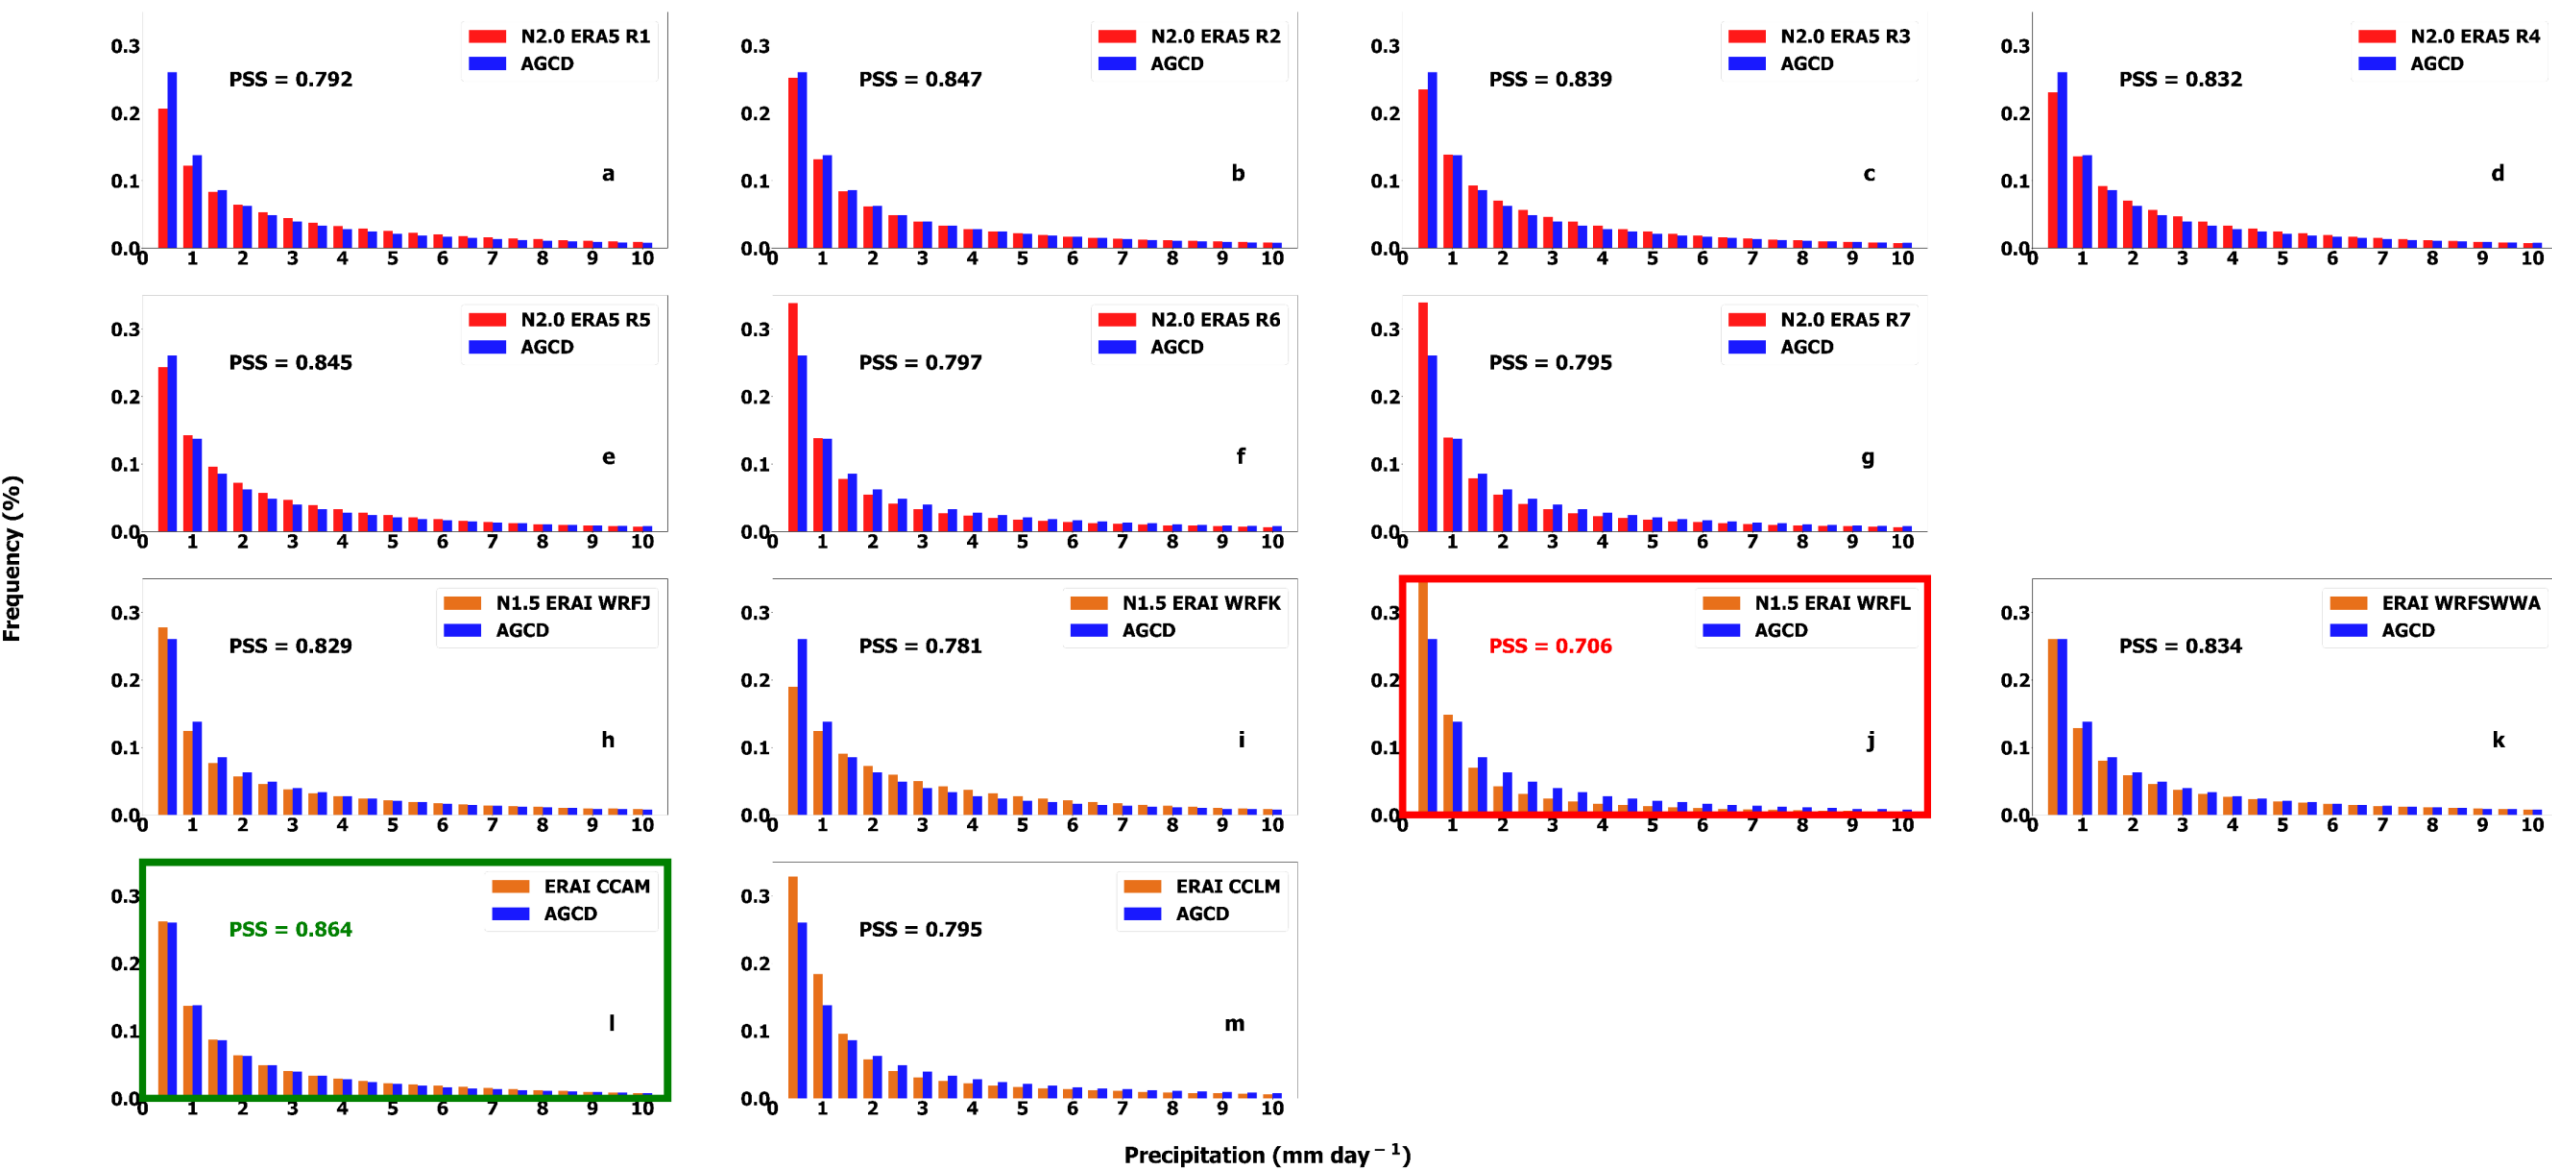

**Fig. S19** Probability density functions of daily precipitation (mm day<sup>-1</sup>) with bin width of 0.5 mm in the Rangelands Natural Resource Management (NRM) region.

### Northern Australia

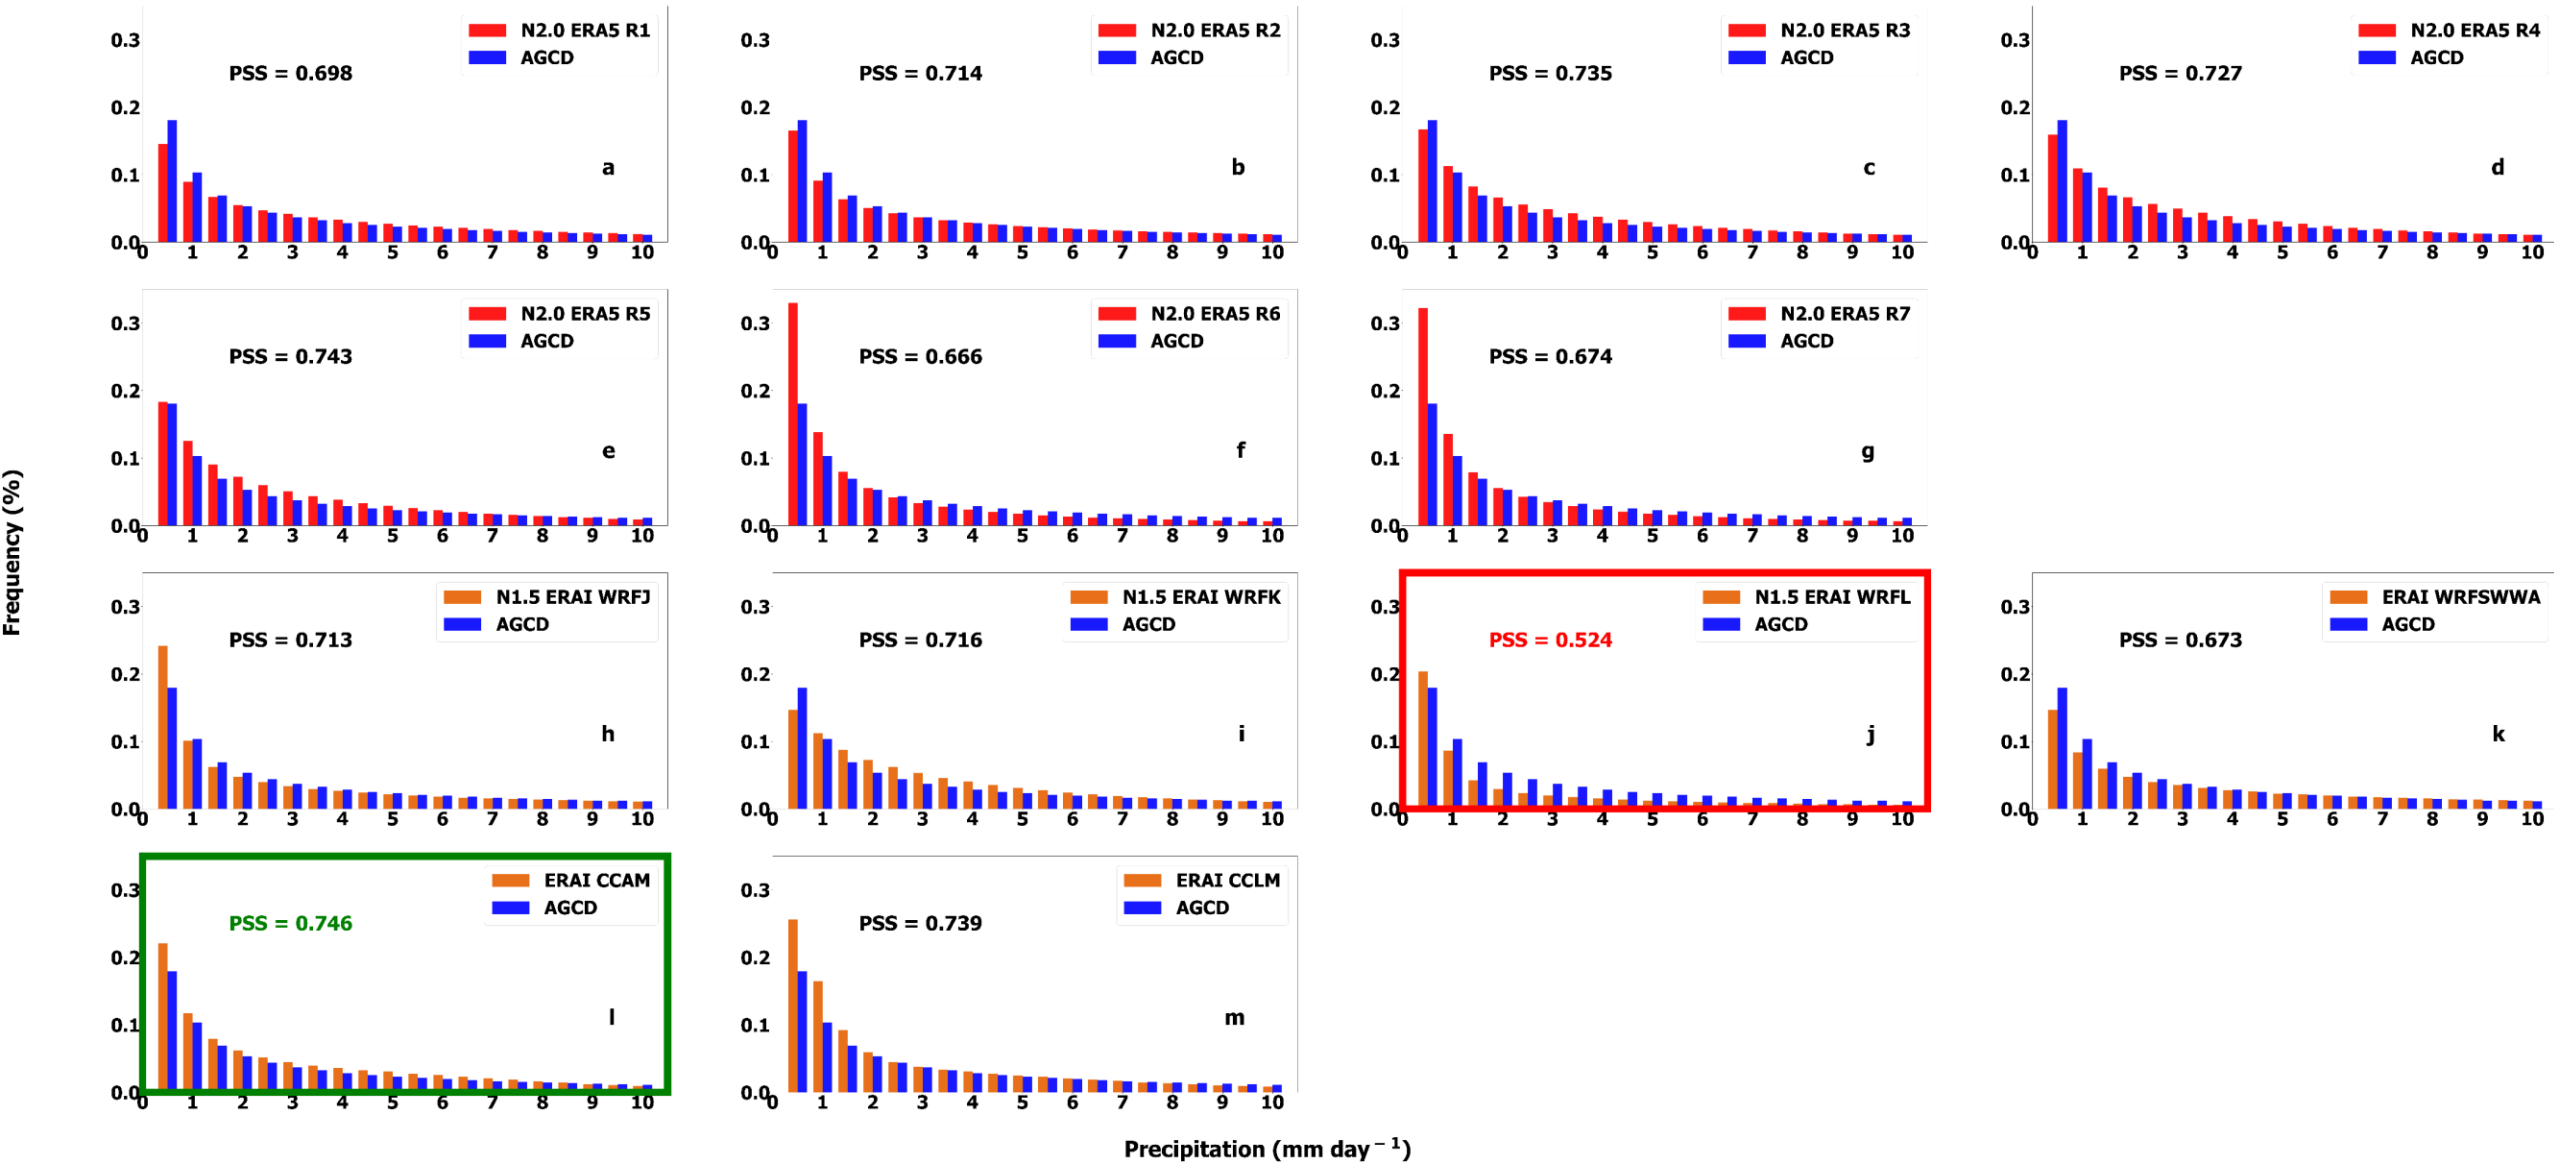

**Fig. S20** Probability density functions of daily precipitation (mm day<sup>-1</sup>) with bin width of 0.5 mm in the Northern Australia Natural Resource Management (NRM) region.

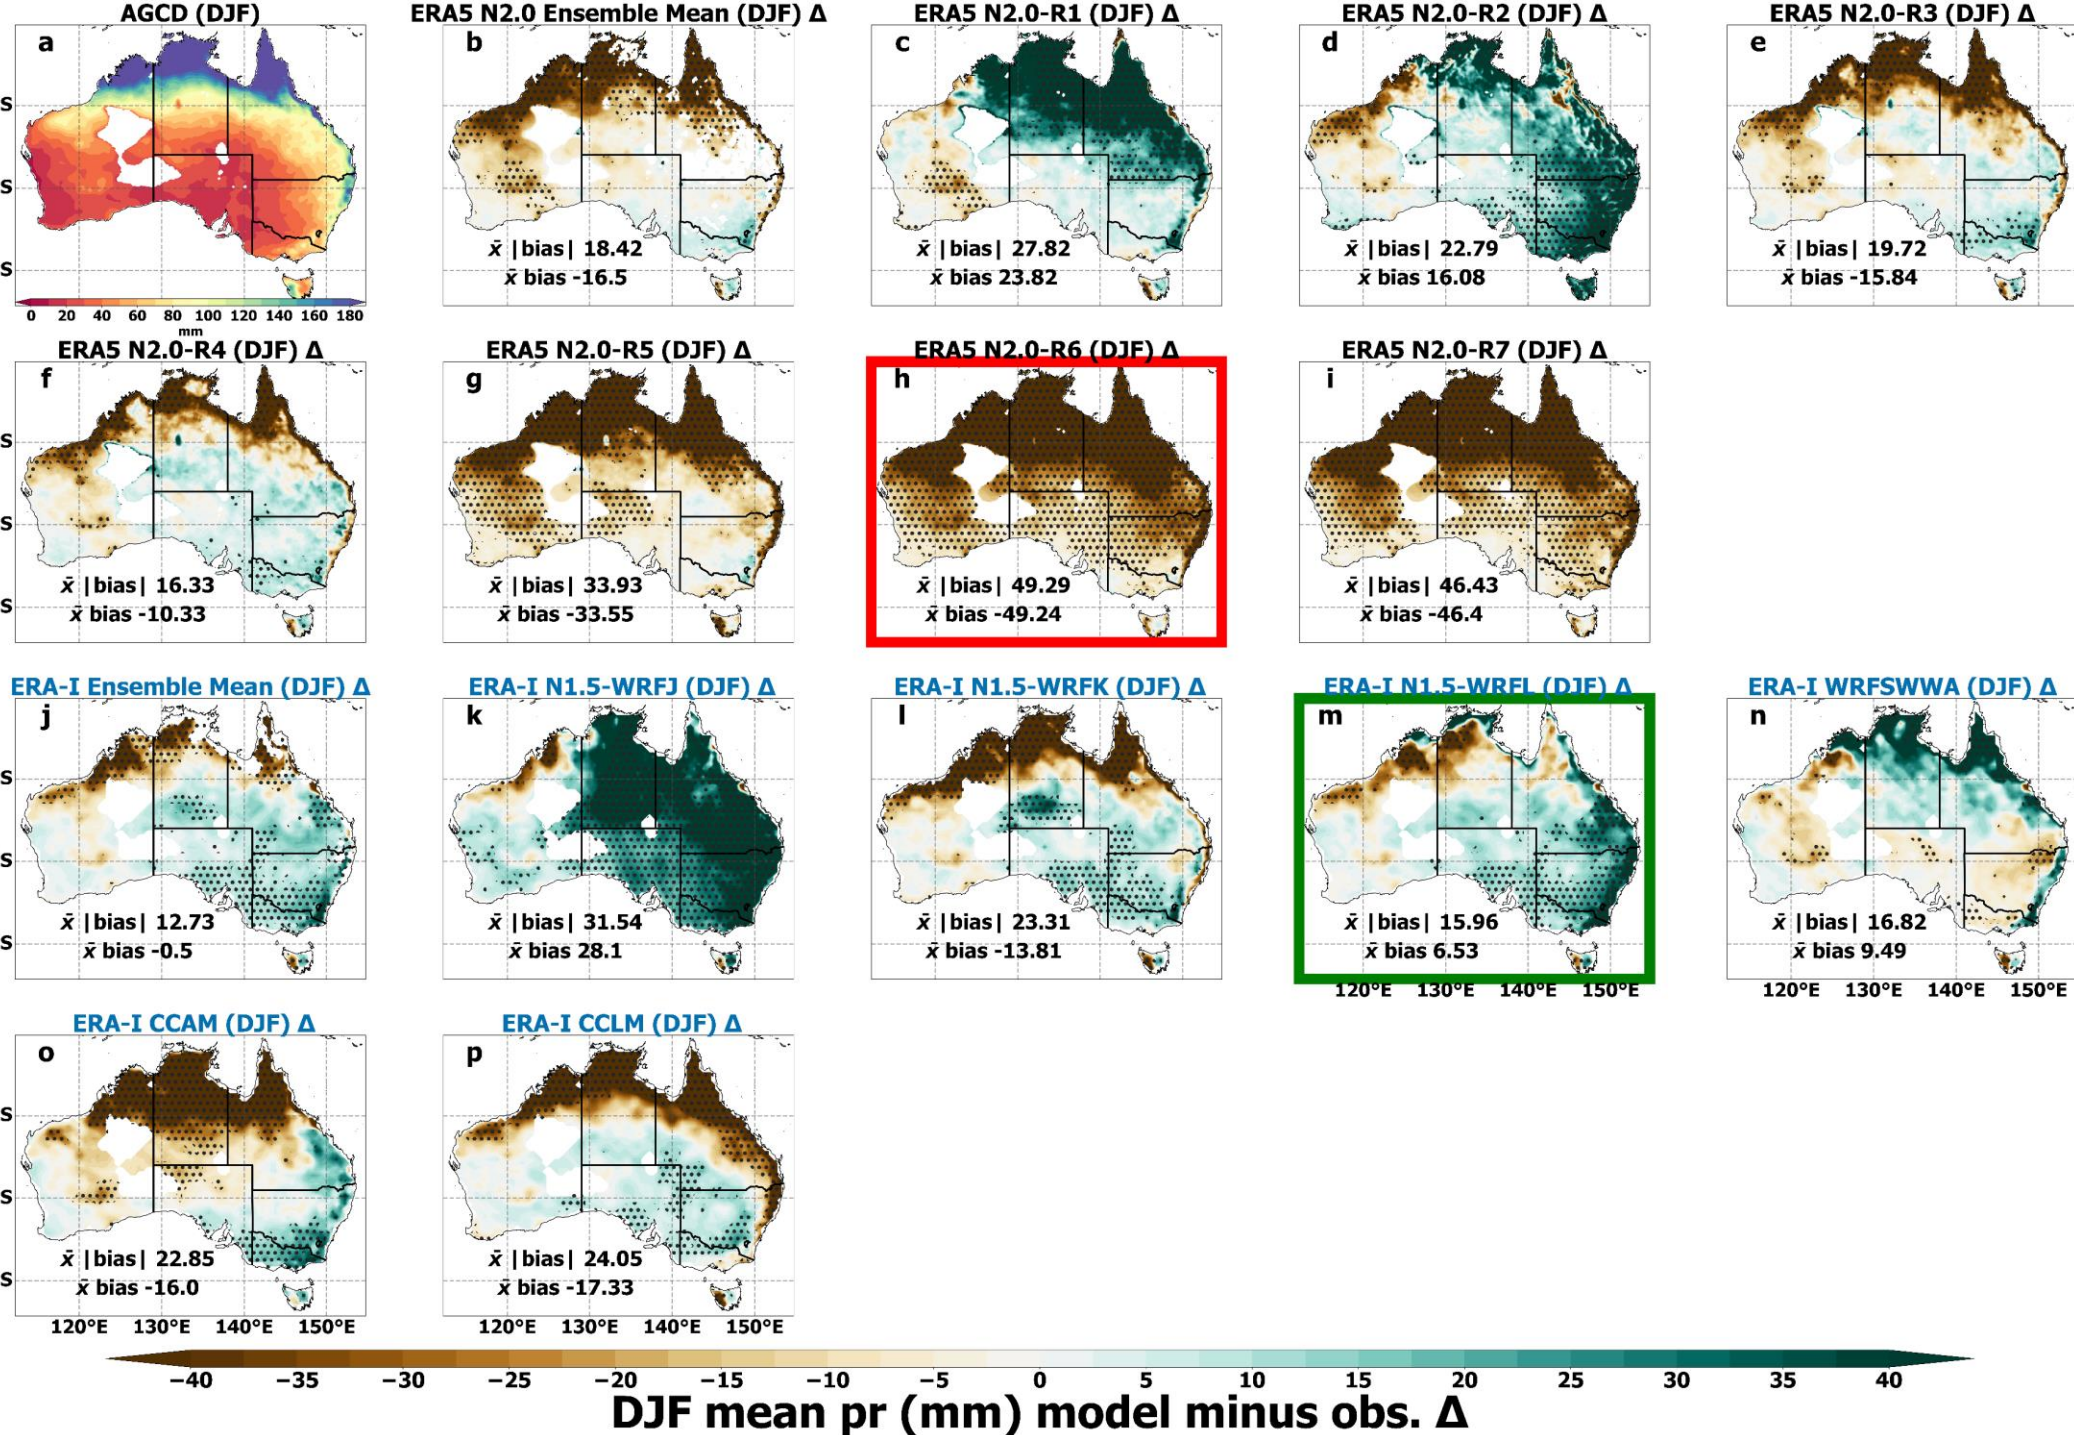

**Fig. S21** Summer (DJF) precipitation bias with respect to gridded observations with stippling and panel boundary colouring as per Fig. S5.

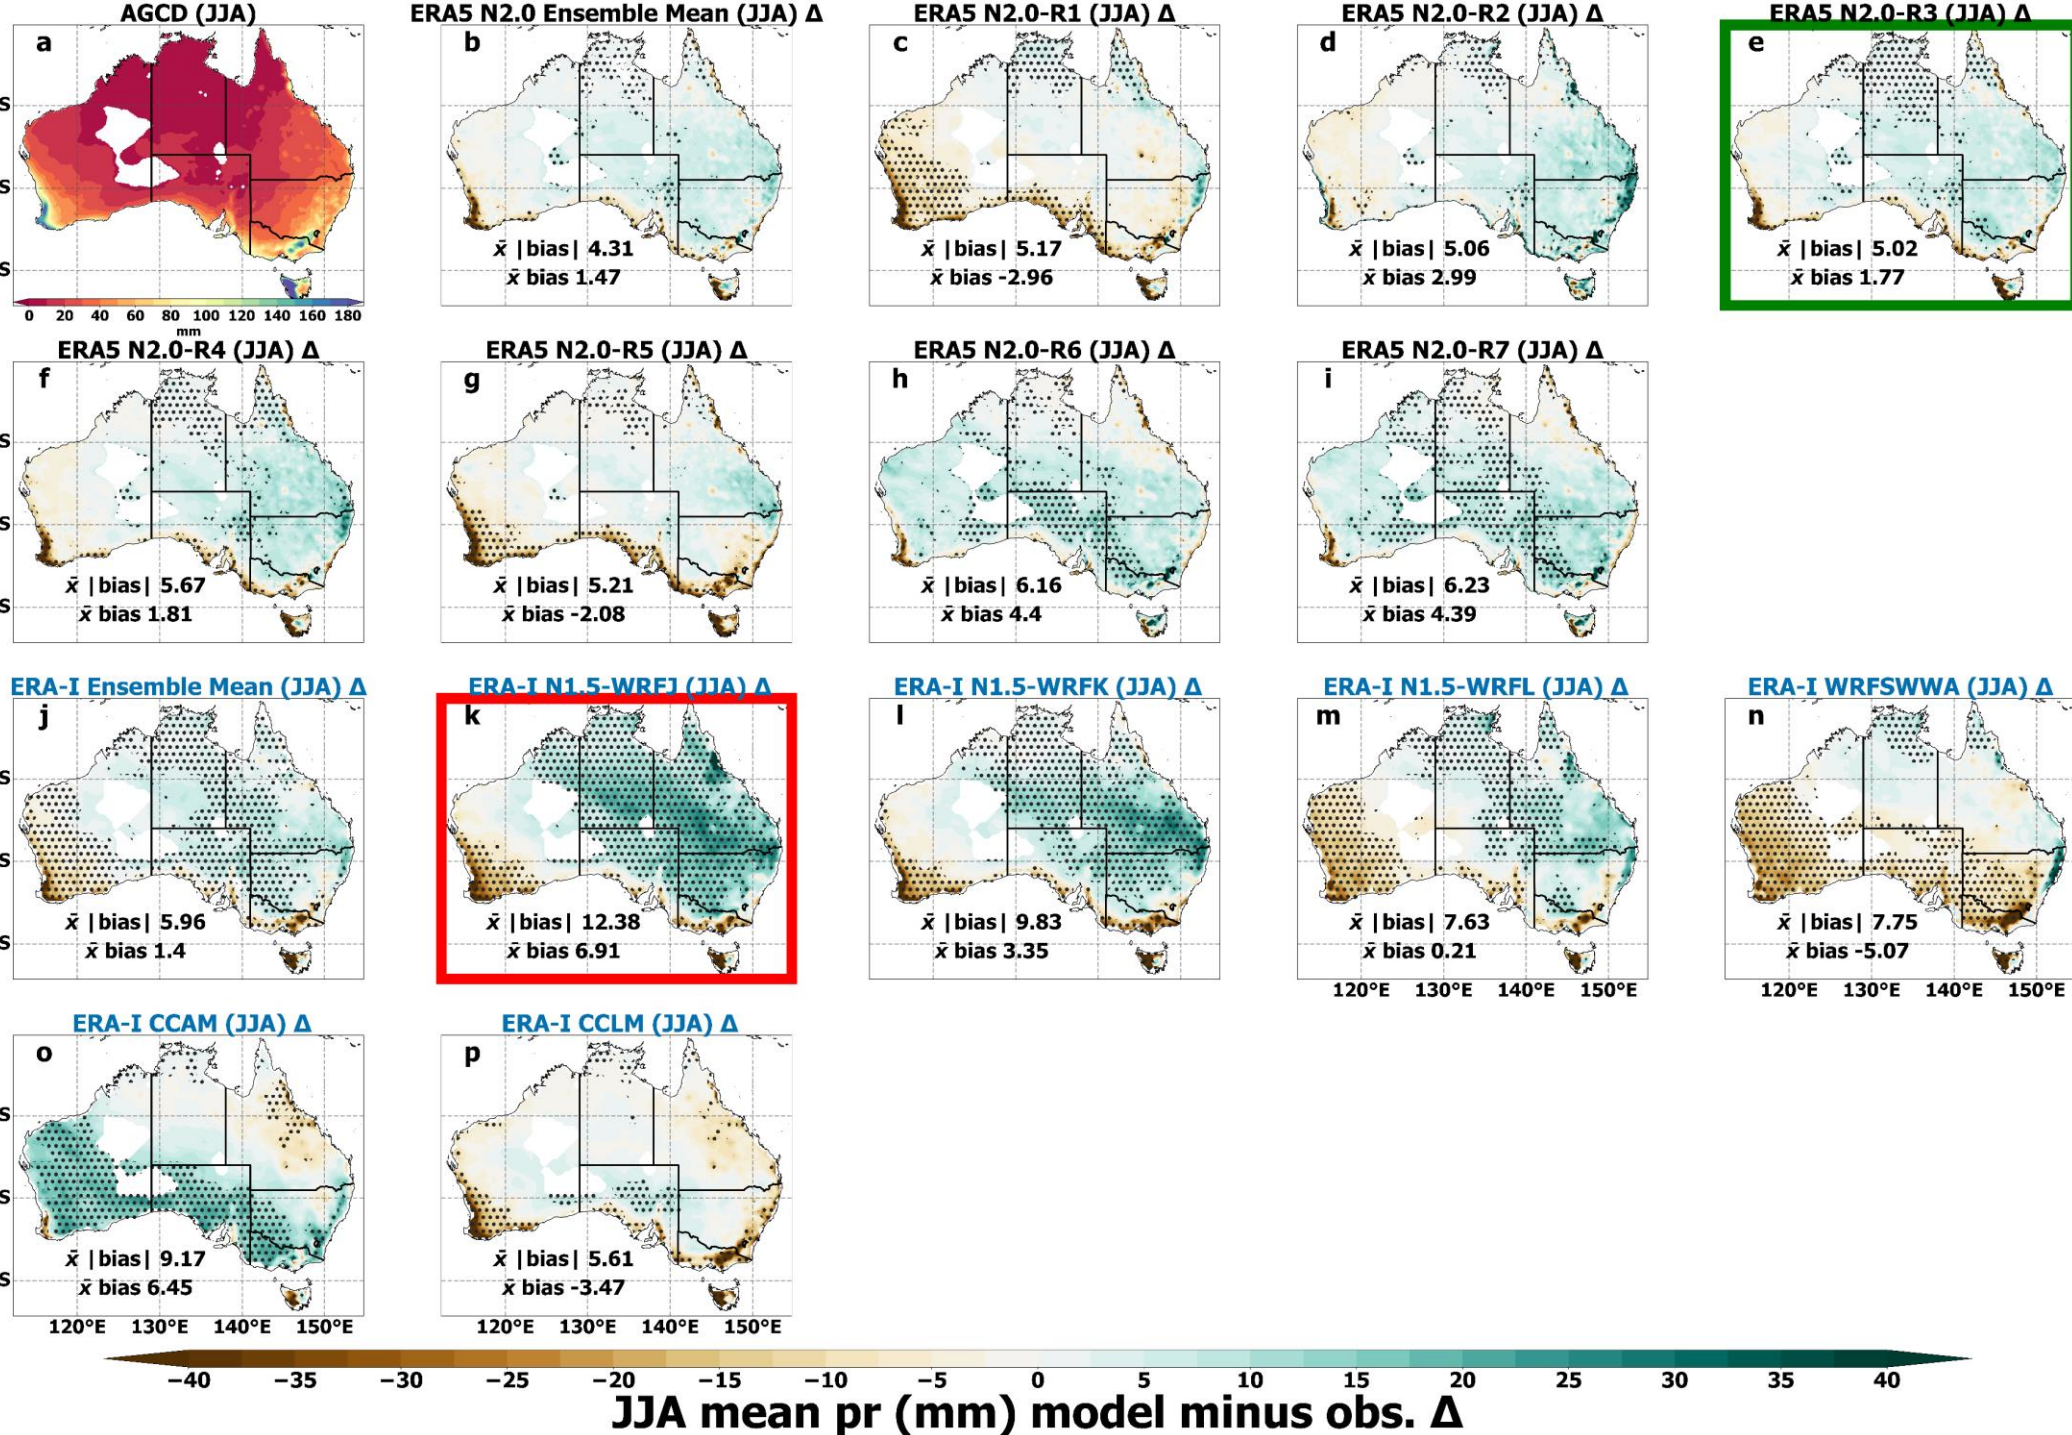

**Fig. S22** Winter (JJA) precipitation bias with respect to gridded observations with stippling and panel boundary colouring as per Fig. S5.



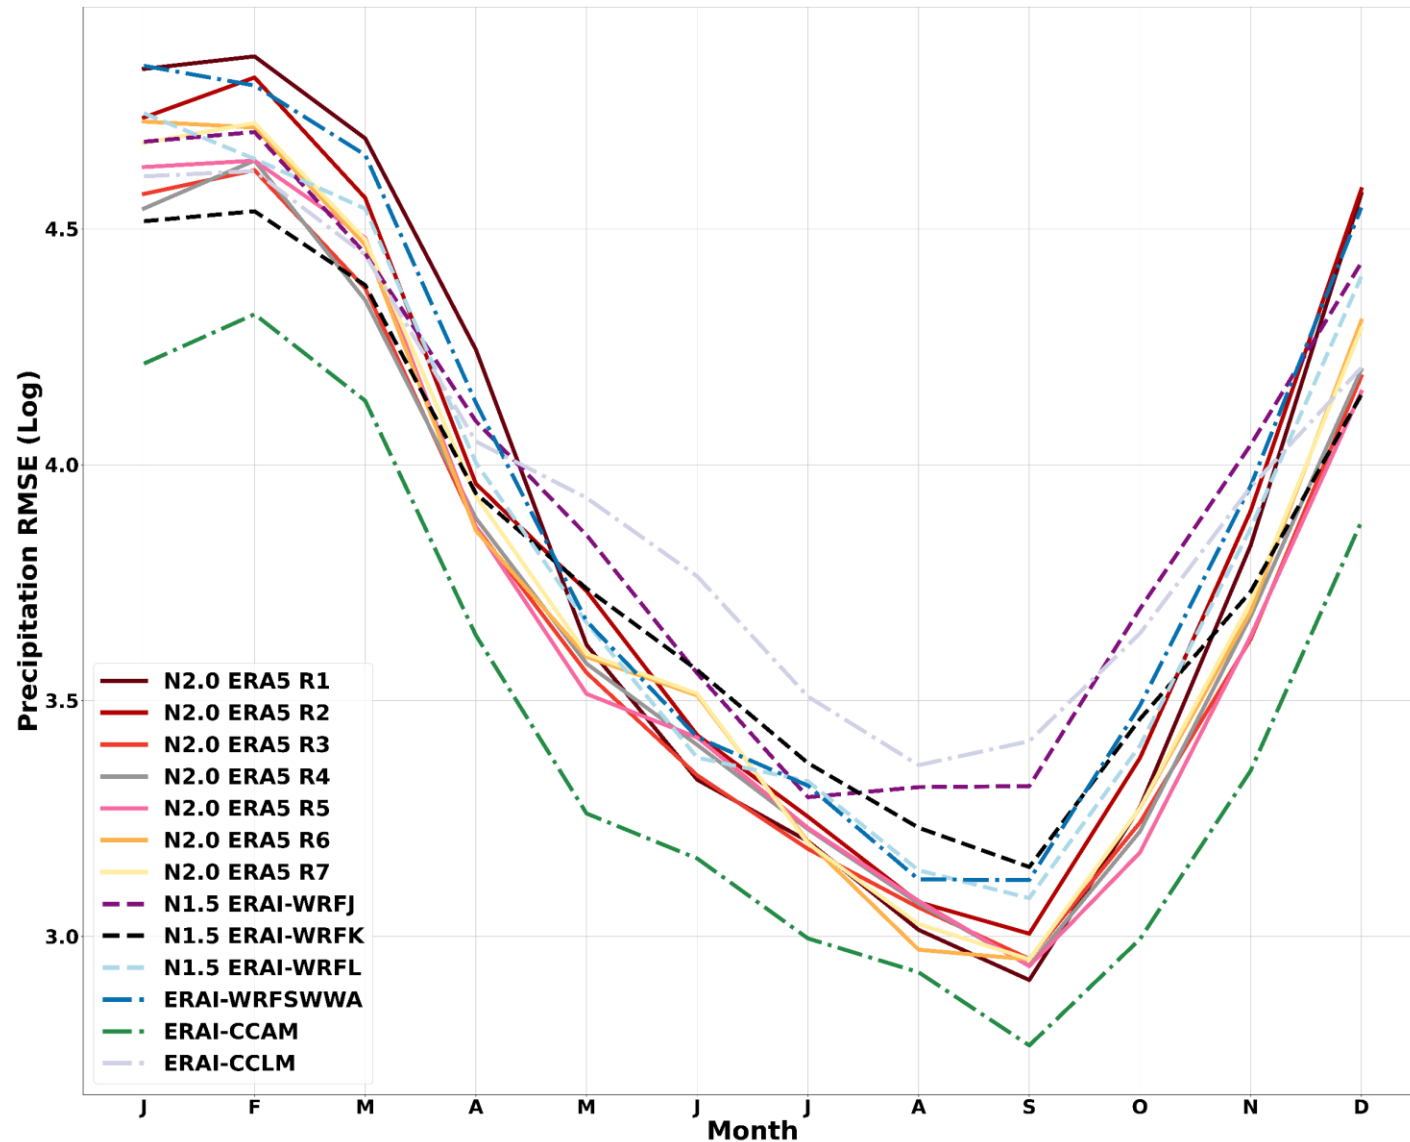

**Fig. S23** RMSE (log-transformed) annual cycle for historical precipitation as simulated over Australia by the ERA5-forced and ERA-Interim-forced RCMs.

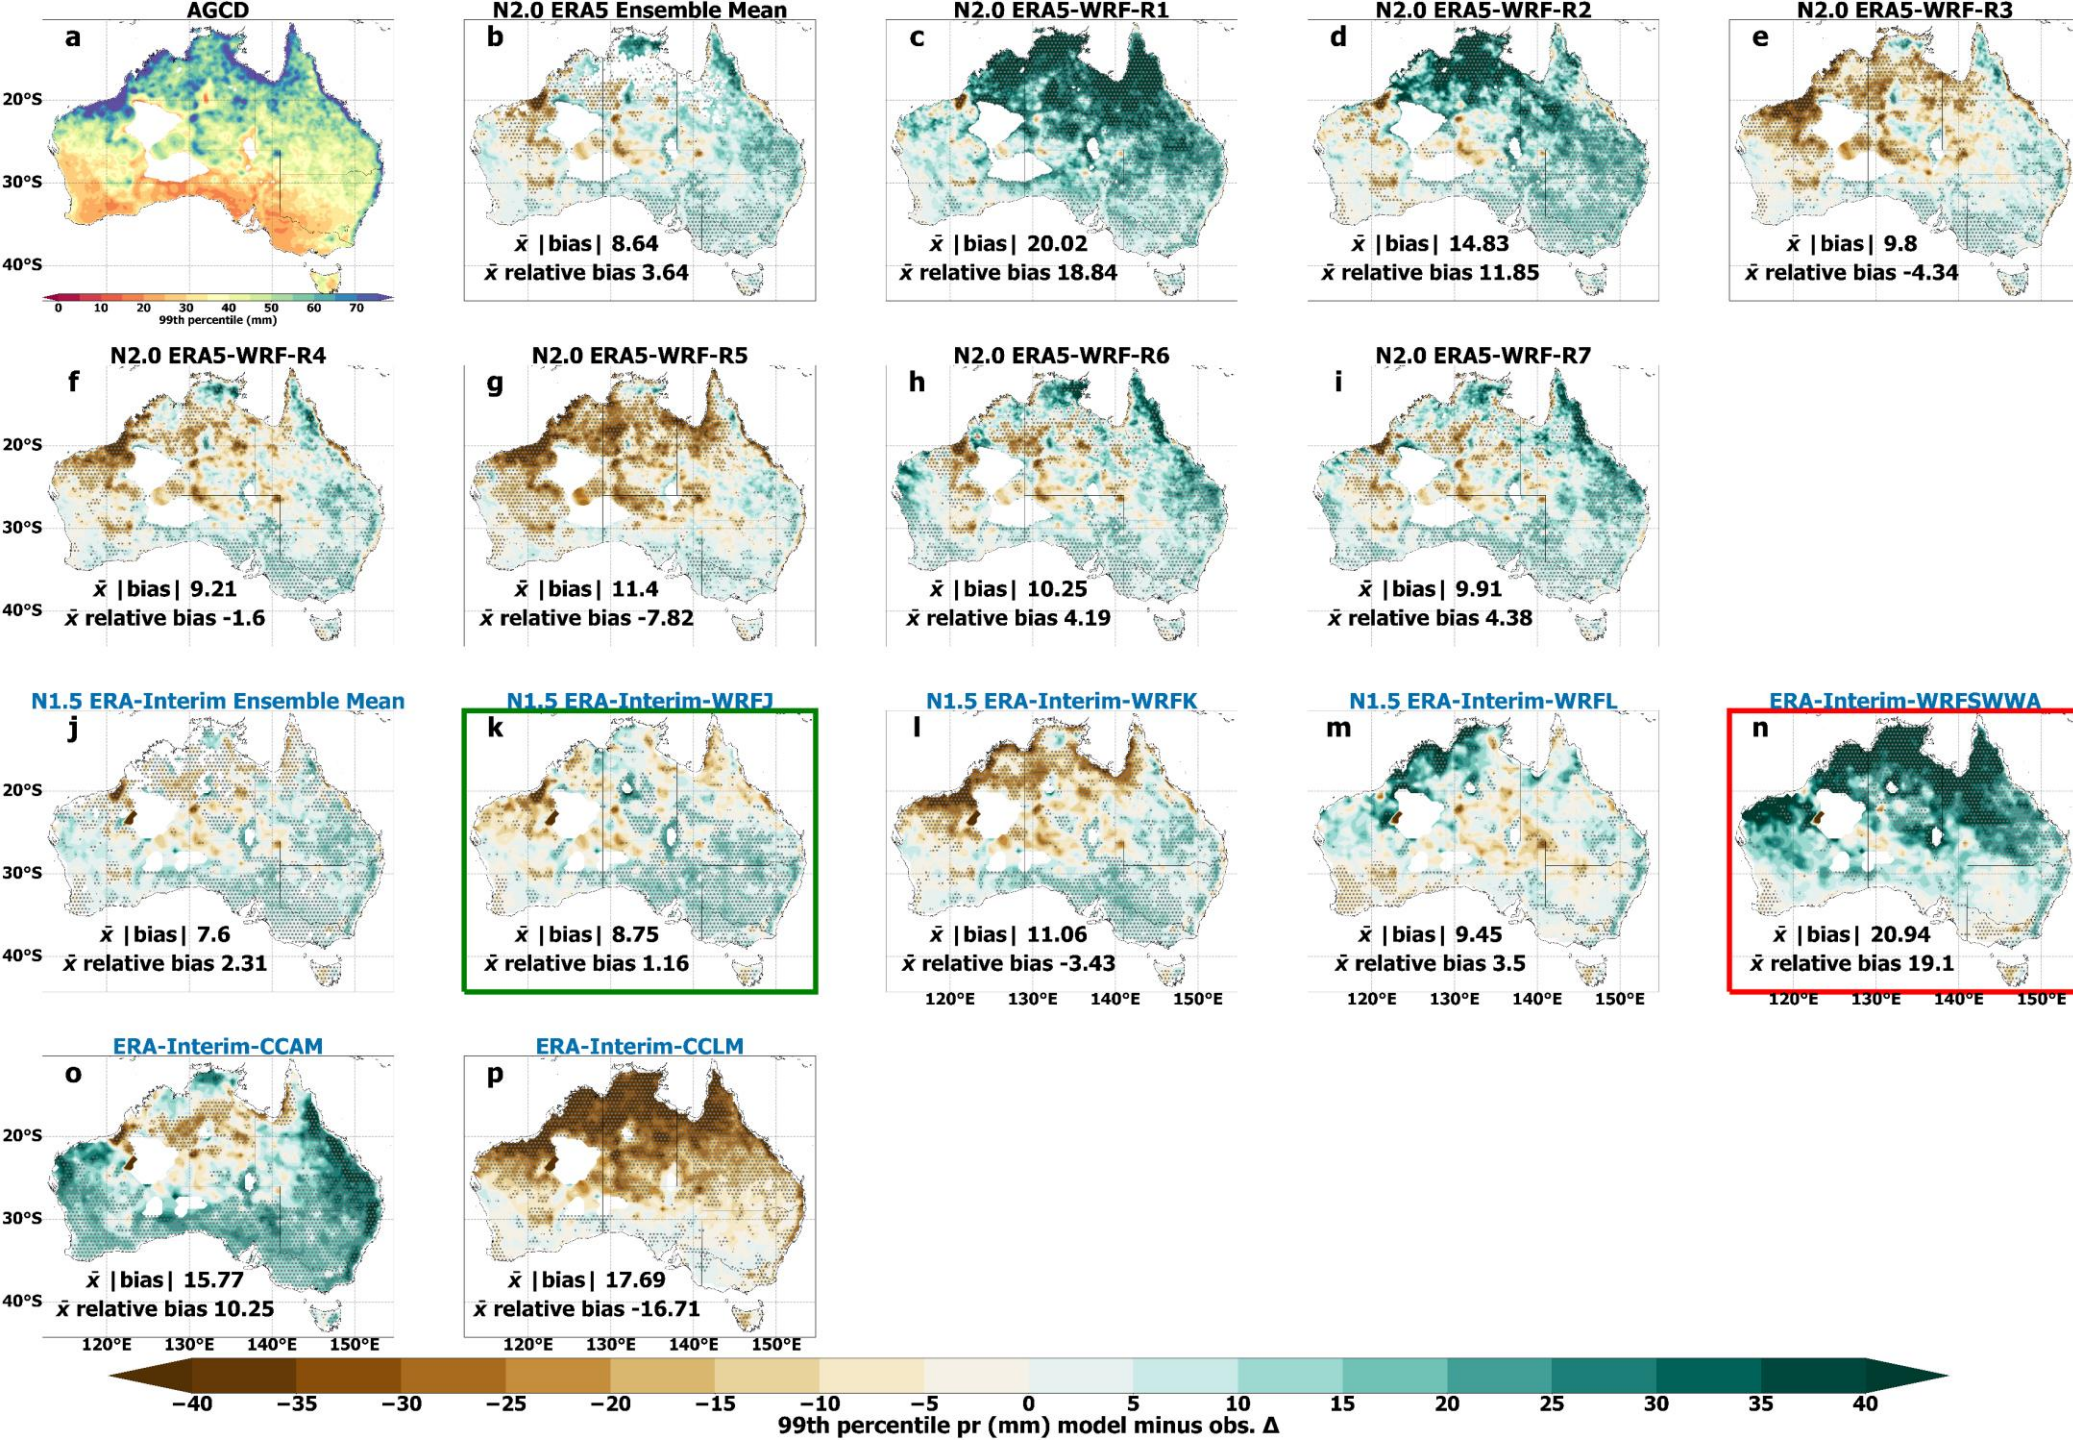

**Fig. S24** Biases in 99<sup>th</sup> percentile precipitation simulated by the ERA5 and ERA-Interim forced RCMs relative to AGCD gridded observations with stippling and panel boundary colouring as per Fig. S5.

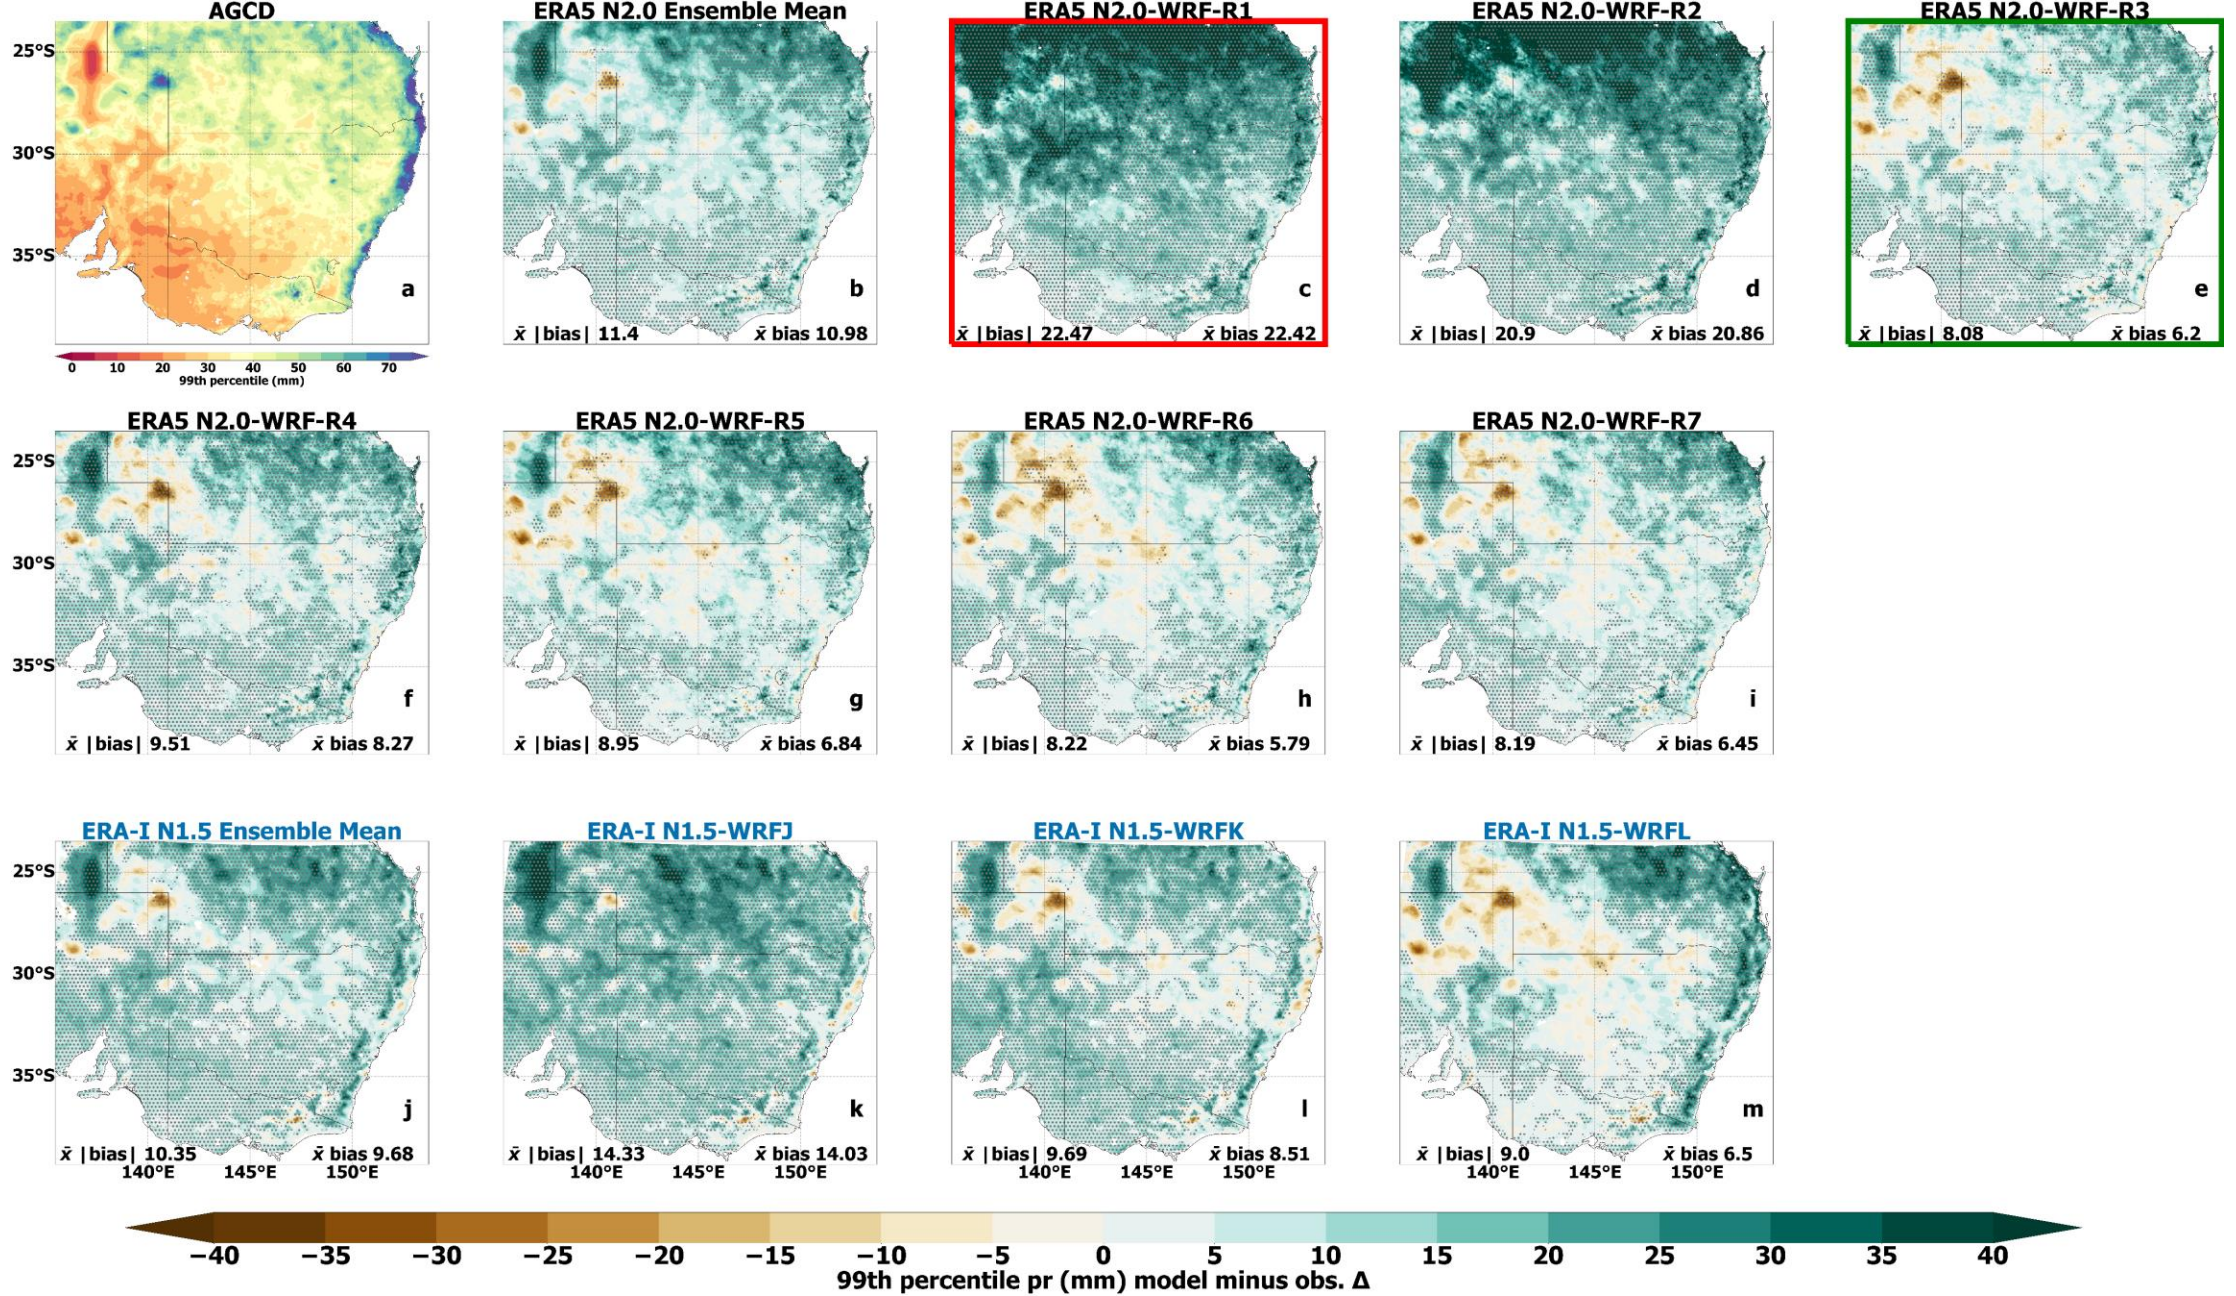

**Fig. S25** Biases in 99<sup>th</sup> percentile precipitation simulated over south-eastern Australia (WRF simulation inner domain) by the ERA5 and ERA-Interim forced RCMs relative to AGCD gridded observations with stippling and panel boundary colouring as per Fig. S5.

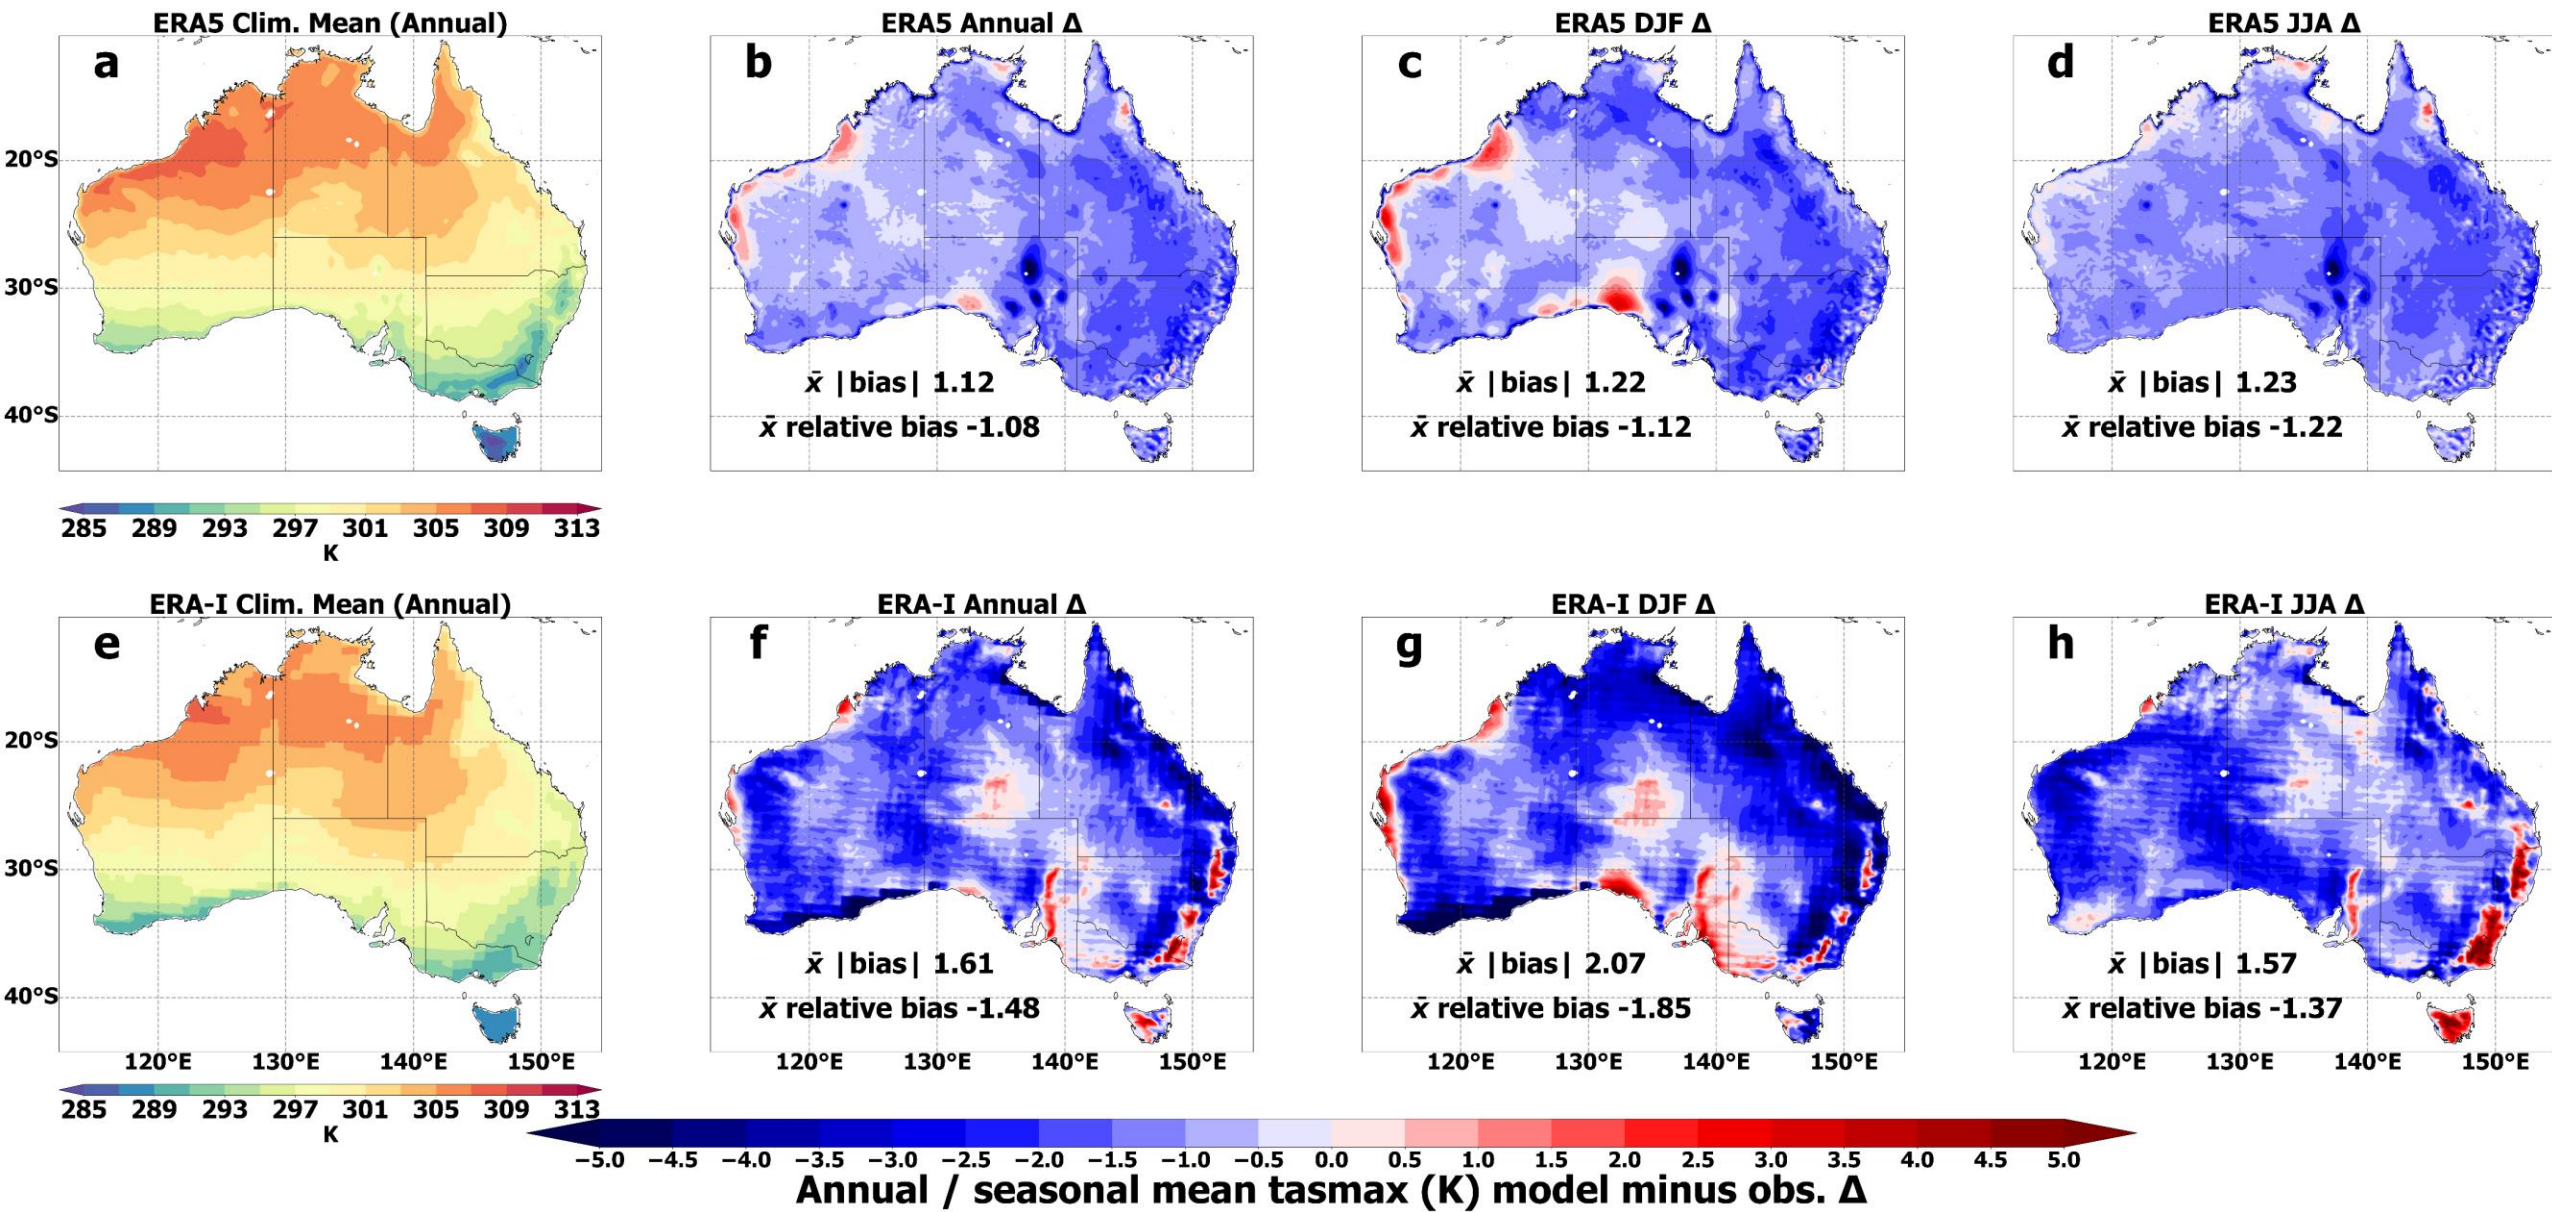

**Fig. S26** Annual, summer, and winter mean near-surface atmospheric maximum temperature bias for ERA5 and ERA-Interim reanalyses data sets with respect to Australian Gridded Climate Data (AGCD) observations (1981-2010).

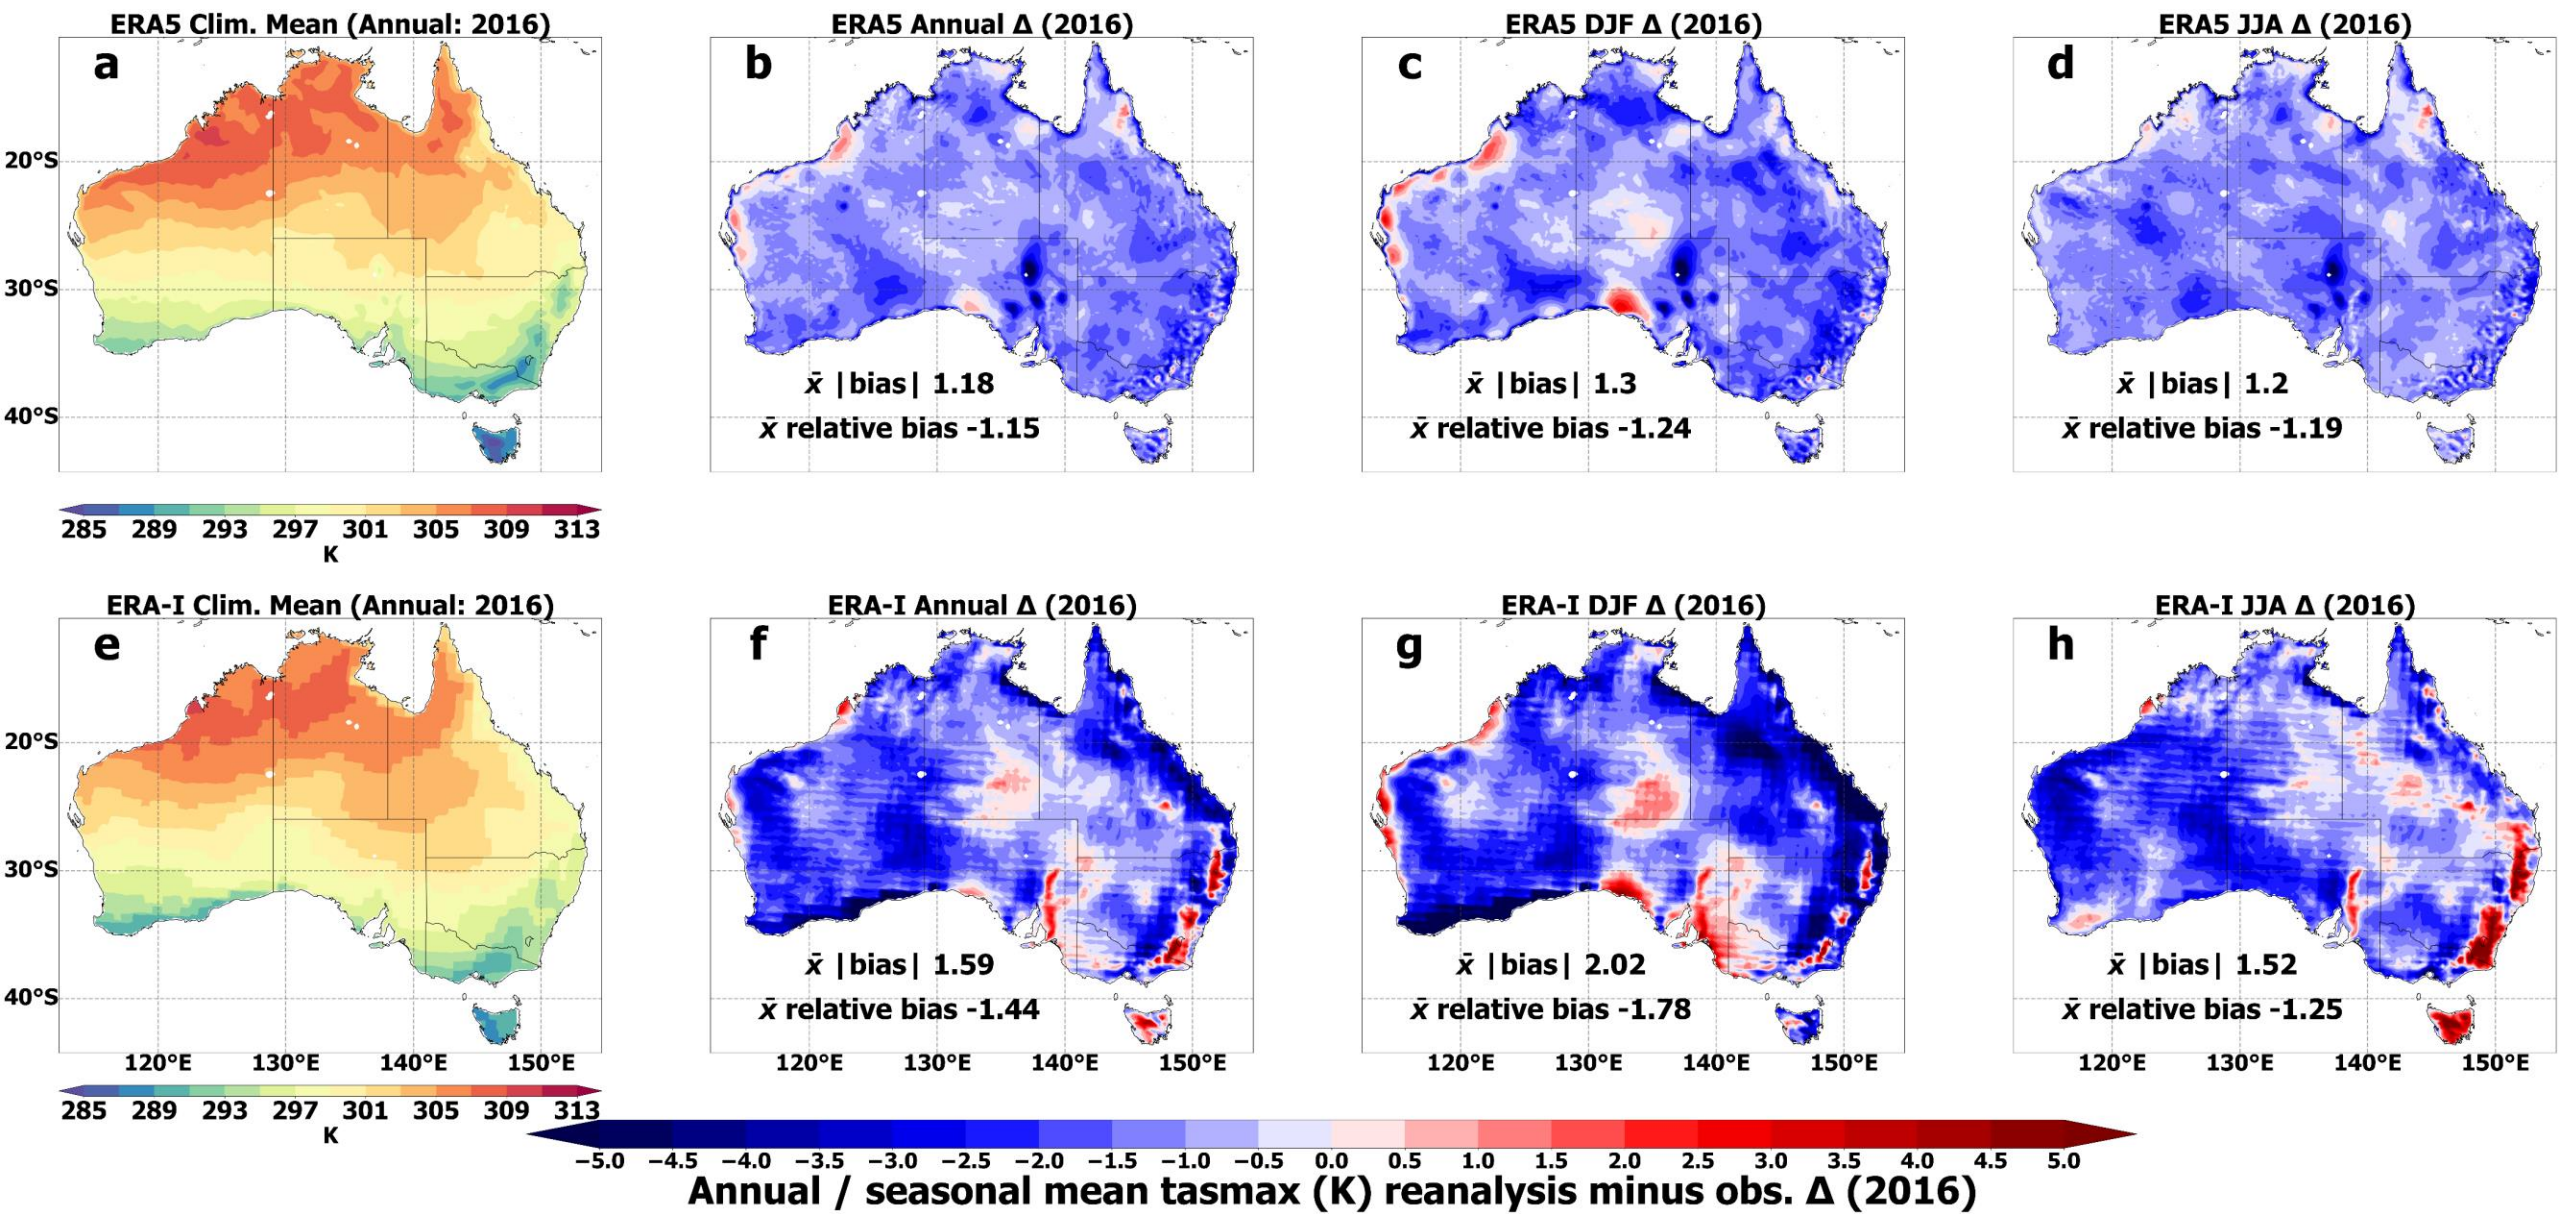

Fig. S27 As per Fig. S26 but for 2016.

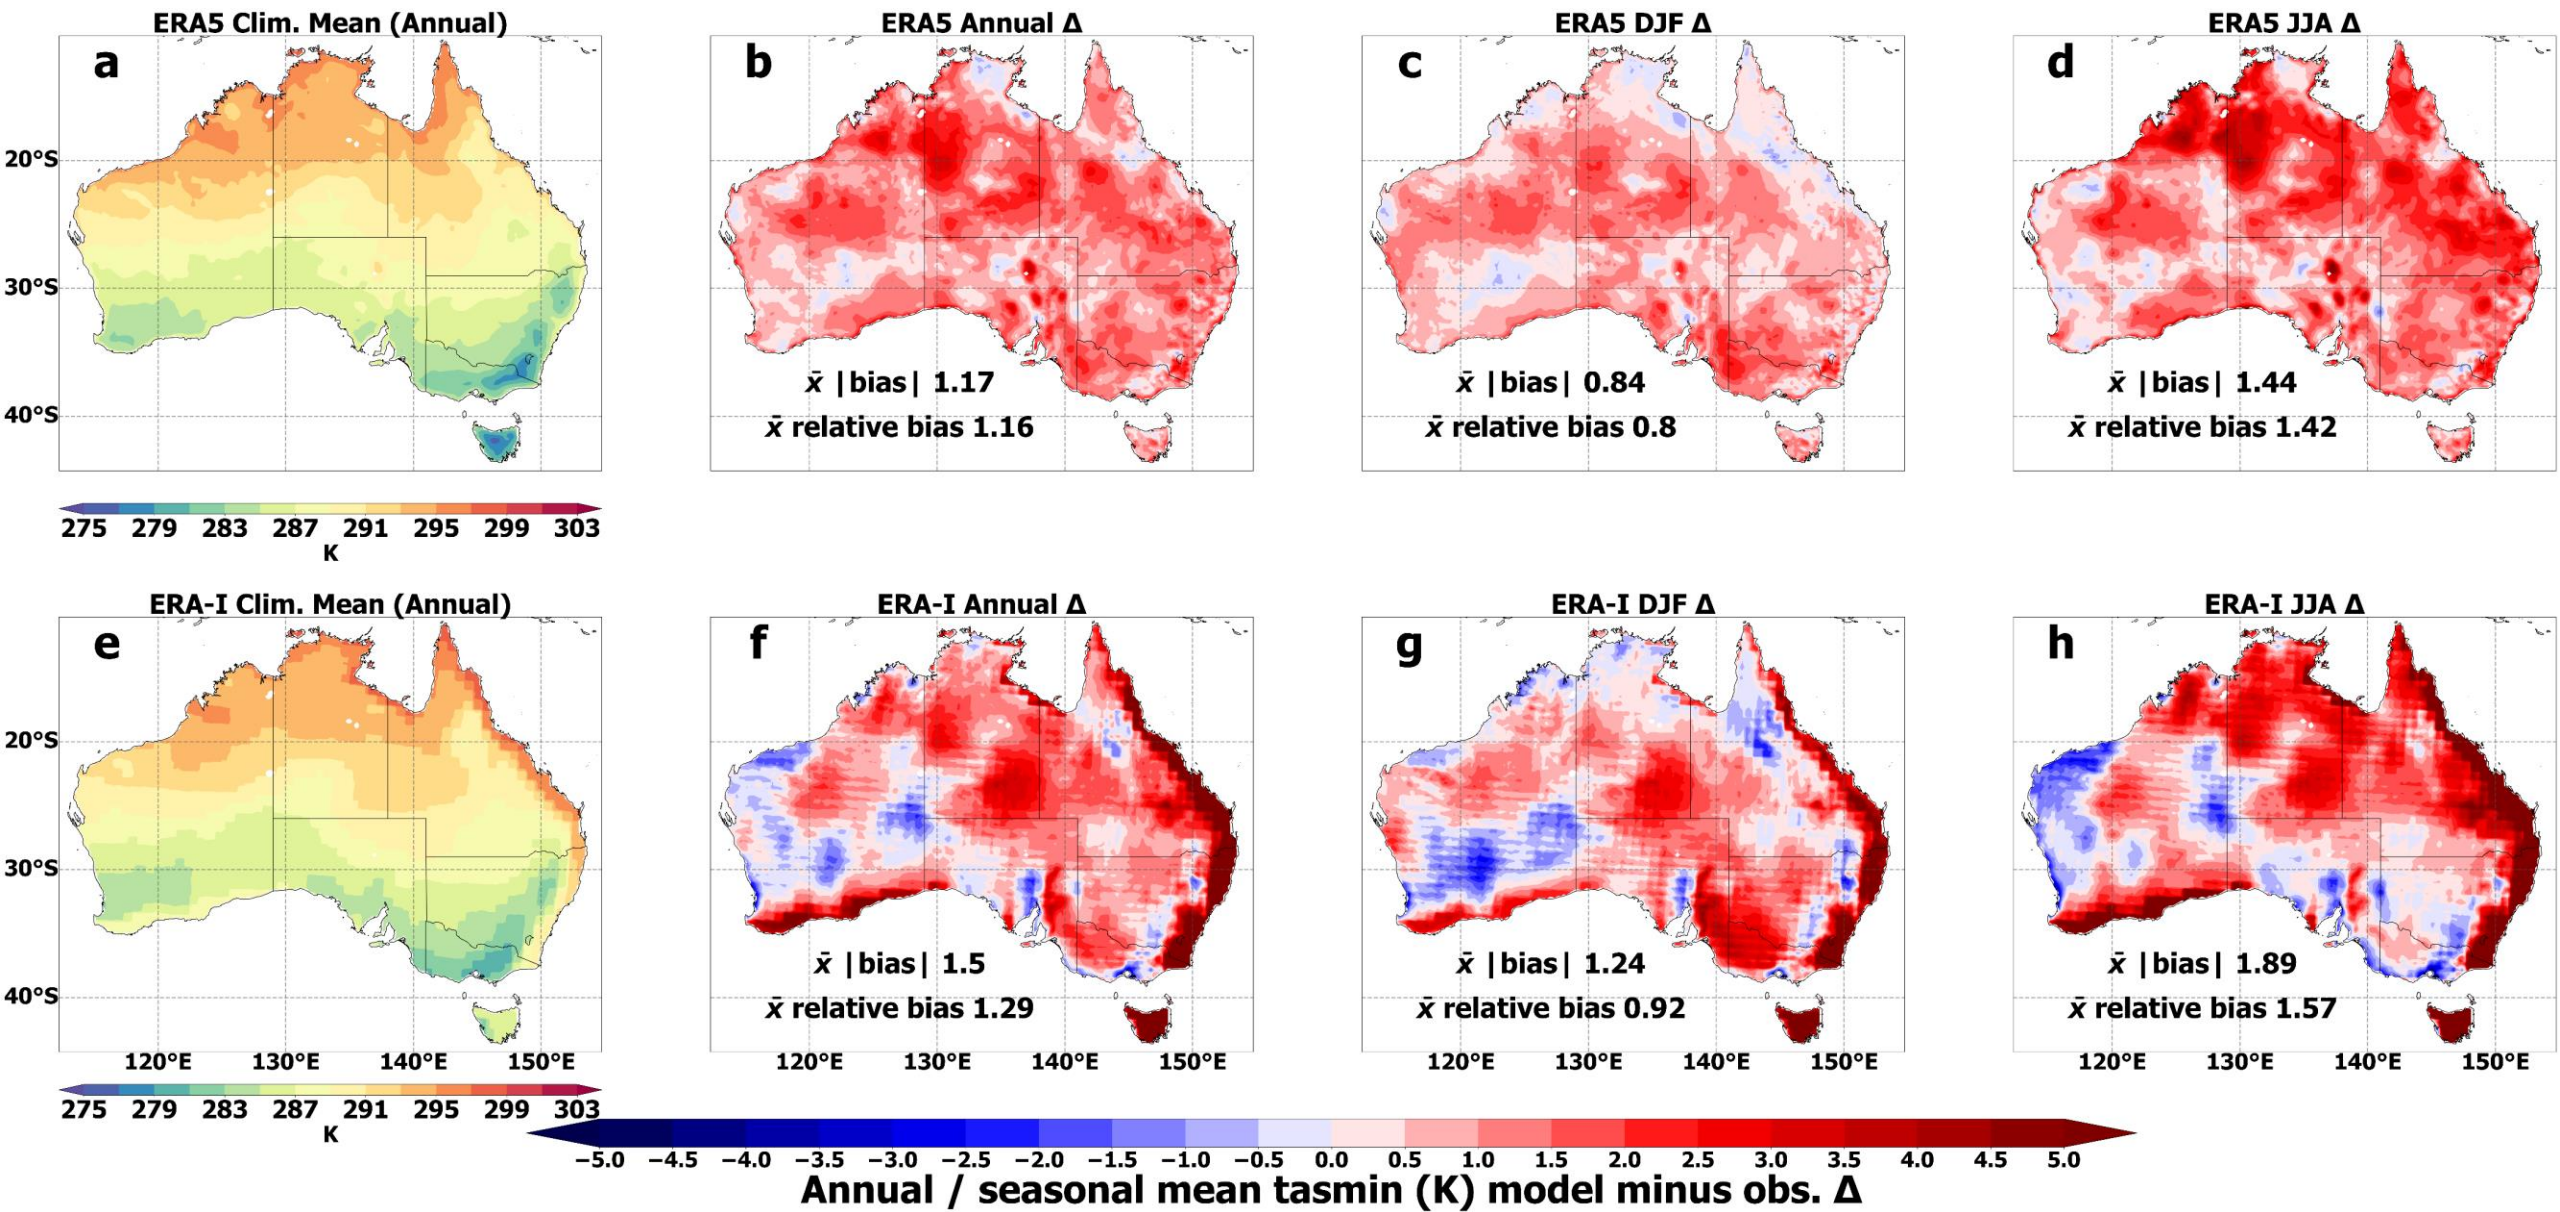

**Fig. S28** Annual, summer, and winter mean near-surface atmospheric minimum temperature bias for ERA5 and ERA-Interim reanalyses data sets with respect to Australian Gridded Climate Data (AGCD) observations (1981-2010).

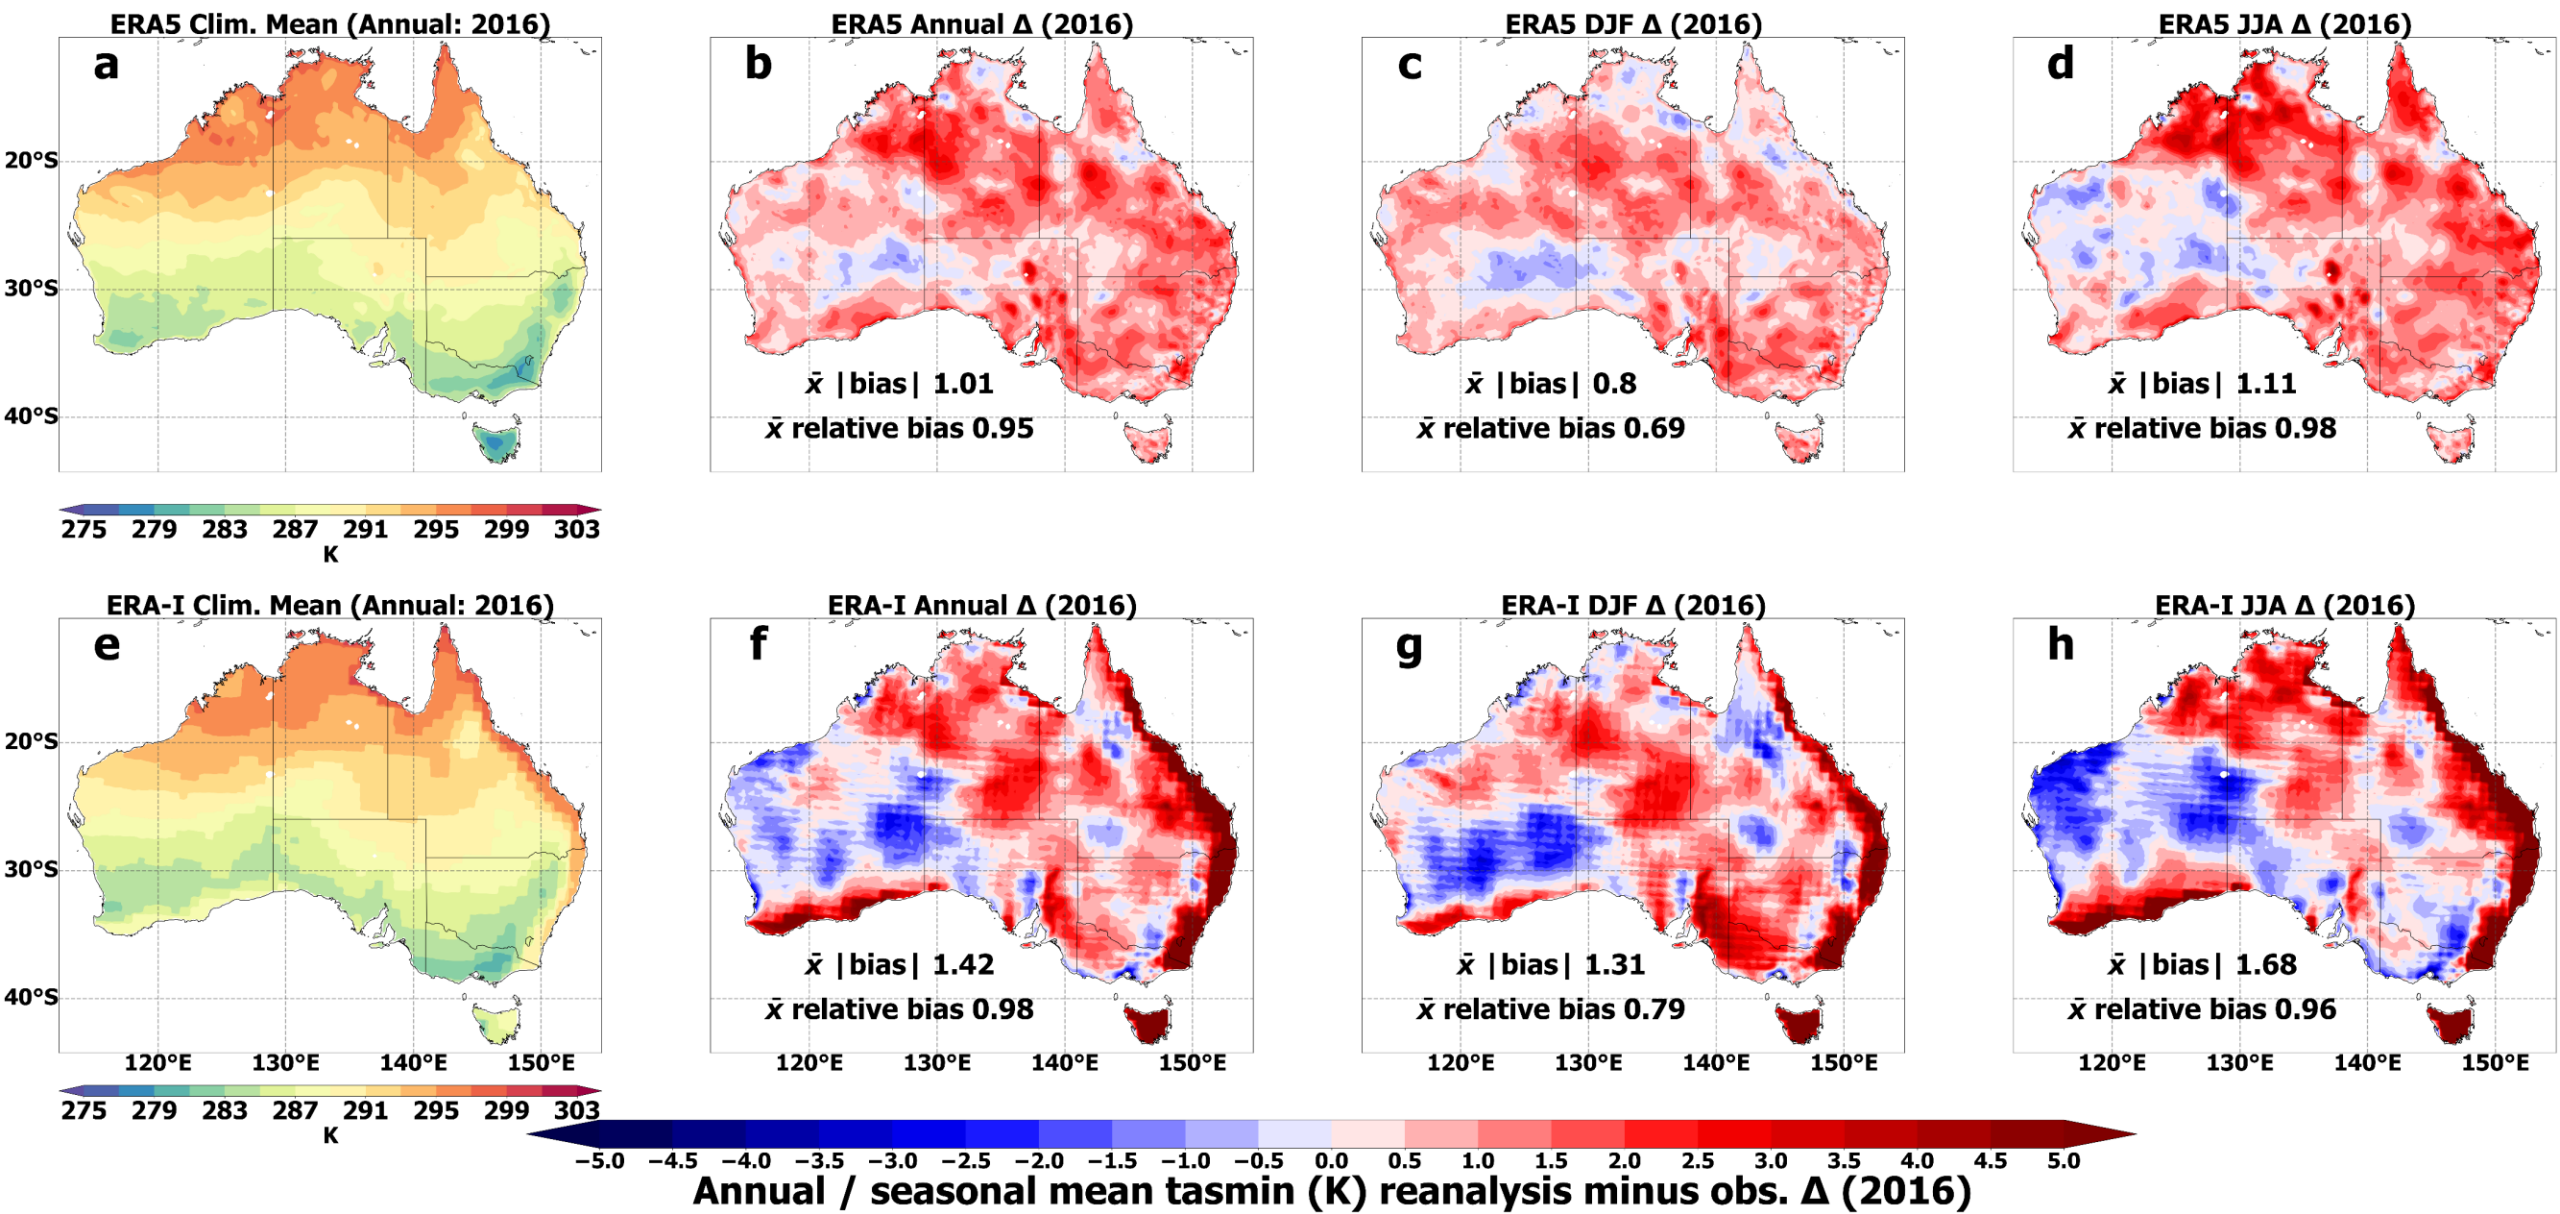

Fig. S29 As per Fig. S28 but for 2016.

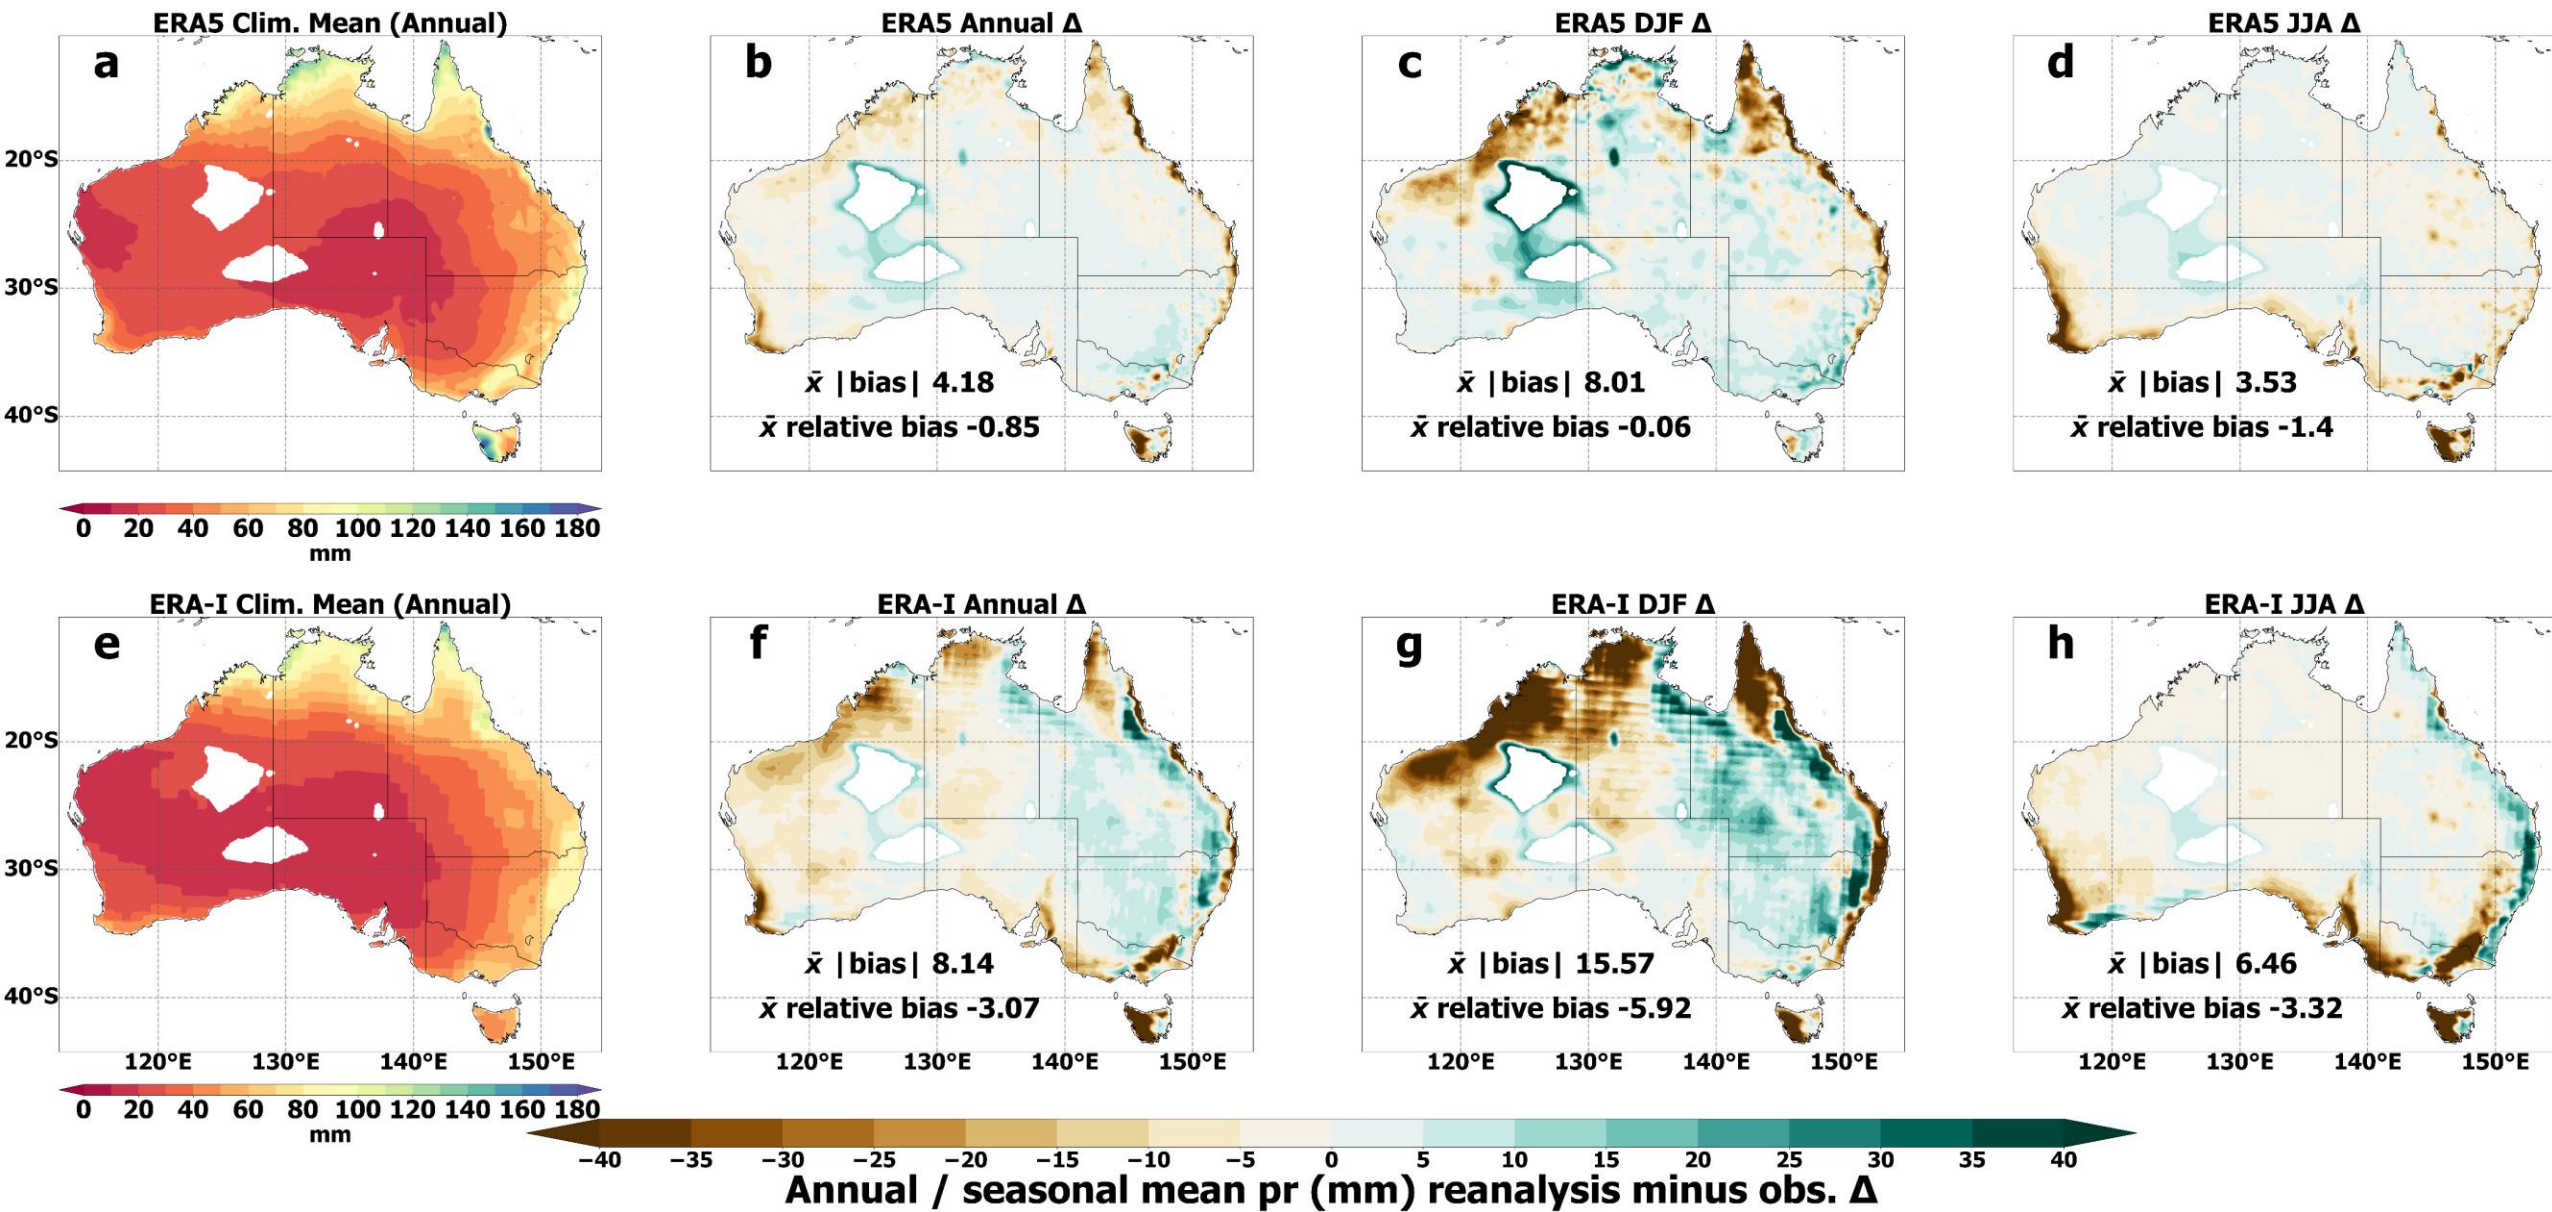

**Fig. S30** Annual, summer, and winter mean precipitation bias for ERA5 and ERA-Interim reanalyses data sets with respect to Australian Gridded Climate Data (AGCD) observations (1981-2010).





**Fig. S32** Namelist settings for the CORDEX-CMIP6 NARClM2.0 ERA5-forced RCMs R1-R7: left panel shows physics settings for each RCM; right panel shows settings universal to each of R1-R7.

|              | Domain               | CORDEX Australasia 20 km outer domain |        |        |        |        |        |        | Southeast Australia Convection-permitting 4 km inner domain |        |        |        |        |        |      |    |
|--------------|----------------------|---------------------------------------|--------|--------|--------|--------|--------|--------|-------------------------------------------------------------|--------|--------|--------|--------|--------|------|----|
|              |                      | RCM                                   | R1     | R2     | R3     | R4     | R5     | R6     | R7                                                          | R1     | R2     | R3     | R4     | R5     | R6   | R7 |
| physics      | mp_physics           | 6                                     | 6      | 8      | 8      | 8      | 8      | 8      | 6                                                           | 6      | 8      | 8      | 8      | 8      | 8    |    |
|              | ra_sw_physics        | 5                                     | 4      | 4      | 4      | 4      | 4      | 4      | 5                                                           | 4      | 4      | 4      | 4      | 4      | 4    |    |
|              | ra_lw_physics        | 5                                     | 4      | 4      | 4      | 4      | 4      | 4      | 5                                                           | 4      | 4      | 4      | 4      | 4      | 4    |    |
|              | sf_sfclay_physics    | 1                                     | 1      | 1      | 1      | 1      | 1      | 1      | 1                                                           | 1      | 1      | 1      | 1      | 1      | 1    |    |
|              | sf_surface_physics   | 2                                     | 4      | 4      | 4      | 4      | 4      | 4      | 2                                                           | 4      | 4      | 4      | 4      | 4      | 4    |    |
|              | bl_pbl_physics       | 1                                     | 5      | 5      | 5      | 7      | 7      | 7      | 1                                                           | 5      | 5      | 5      | 7      | 7      | 7    |    |
|              | cu_physics           | 2                                     | 1      | 2      | 2      | 2      | 6      | 6      | 0                                                           | 0      | 0      | 0      | 0      | 0      | 0    |    |
|              | sf_urban_physics     | 1                                     | 1      | 1      | 1      | 1      | 1      | 1      | 1                                                           | 1      | 1      | 1      | 1      | 1      | 1    | 1  |
|              | radt                 | 10                                    | 10     | 10     | 10     | 10     | 10     | 10     | 10                                                          | 10     | 10     | 10     | 10     | 10     | 10   |    |
|              | cutdt                | 0                                     | 0      | 0      | 0      | 0      | 0      | 0      | 0                                                           | 0      | 0      | 0      | 0      | 0      | 0    |    |
|              | blidt                | 0                                     | 0      | 0      | 0      | 0      | 0      | 0      | 0                                                           | 0      | 0      | 0      | 0      | 0      | 0    |    |
|              | prec_acc_dt          | 60                                    | 60     | 60     | 60     | 60     | 60     | 60     | 60                                                          | 60     | 60     | 60     | 60     | 60     | 60   |    |
|              | bucket_mm            | 1000                                  | 1000   | 1000   | 1000   | 1000   | 1000   | 1000   | 1000                                                        | 1000   | 1000   | 1000   | 1000   | 1000   | 1000 |    |
|              | levsiz               | 59                                    | 59     | 59     | 59     | 59     | 59     | 59     | 59                                                          | 59     | 59     | 59     | 59     | 59     | 59   |    |
|              | paerlev              | 29                                    | 29     | 29     | 29     | 29     | 29     | 29     | 29                                                          | 29     | 29     | 29     | 29     | 29     | 29   |    |
|              | cam_abs_dim1         | 4                                     | 4      | 4      | 4      | 4      | 4      | 4      | 4                                                           | 4      | 4      | 4      | 4      | 4      | 4    |    |
|              | cam_abs_dim2         | 45                                    | 45     | 45     | 45     | 45     | 45     | 45     | 45                                                          | 45     | 45     | 45     | 45     | 45     | 45   |    |
|              | isfflx               | 1                                     | 1      | 1      | 1      | 1      | 1      | 1      | 1                                                           | 1      | 1      | 1      | 1      | 1      | 1    |    |
|              | surface_input_source | 1                                     | 1      | 1      | 1      | 1      | 1      | 1      | 1                                                           | 1      | 1      | 1      | 1      | 1      | 1    |    |
|              | num_soil_layers      | 4                                     | 4      | 4      | 4      | 4      | 4      | 4      | 4                                                           | 4      | 4      | 4      | 4      | 4      | 4    |    |
| sst_update   | 1                    | 1                                     | 1      | 1      | 1      | 1      | 1      | 1      | 1                                                           | 1      | 1      | 1      | 1      | 1      |      |    |
| tmn_update   | 1                    | 1                                     | 1      | 1      | 1      | 1      | 1      | 1      | 1                                                           | 1      | 1      | 1      | 1      | 1      |      |    |
| lagday       | 150                  | 150                                   | 150    | 150    | 150    | 150    | 150    | 150    | 150                                                         | 150    | 150    | 150    | 150    | 150    |      |    |
| sst_skin     | 1                    | 1                                     | 1      | 1      | 1      | 1      | 1      | 1      | 1                                                           | 1      | 1      | 1      | 1      | 1      |      |    |
| usemonalb    | .True.               | .True.                                | .True. | .True. | .True. | .True. | .True. | .True. | .True.                                                      | .True. | .True. | .True. | .True. | .True. |      |    |
| rdmaxalb     | .True.               | .True.                                | .True. | .True. | .True. | .True. | .True. | .True. | .True.                                                      | .True. | .True. | .True. | .True. | .True. |      |    |
| slope_rad    | 1                    | 1                                     | 1      | 1      | 1      | 1      | 1      | 1      | 1                                                           | 1      | 1      | 1      | 1      | 1      |      |    |
| topo_shading | 1                    | 1                                     | 1      | 1      | 1      | 1      | 1      | 1      | 1                                                           | 1      | 1      | 1      | 1      | 1      |      |    |
| shadlen      | 25000                | 25000                                 | 25000  | 25000  | 25000  | 25000  | 25000  | 25000  | 25000                                                       | 25000  | 25000  | 25000  | 25000  | 25000  |      |    |
| noah_mp      | dveg                 |                                       | 2      | 2      | 4      | 2      | 2      | 4      |                                                             | 2      | 2      | 4      | 2      | 2      | 4    |    |
|              | opt_crs              |                                       | 1      | 1      | 1      | 1      | 1      | 1      |                                                             | 1      | 1      | 1      | 1      | 1      | 1    |    |
|              | opt_sfc              |                                       | 1      | 1      | 1      | 1      | 1      | 1      |                                                             | 1      | 1      | 1      | 1      | 1      | 1    |    |
|              | opt_btr              |                                       | 1      | 1      | 1      | 1      | 1      | 1      |                                                             | 1      | 1      | 1      | 1      | 1      | 1    |    |
|              | opt_run              |                                       | 3      | 3      | 1      | 3      | 3      | 1      |                                                             | 3      | 3      | 1      | 3      | 3      | 1    |    |
|              | opt_frz              |                                       | 1      | 1      | 1      | 1      | 1      | 1      |                                                             | 1      | 1      | 1      | 1      | 1      | 1    |    |
|              | opt_inf              |                                       | 1      | 1      | 1      | 1      | 1      | 1      |                                                             | 1      | 1      | 1      | 1      | 1      | 1    |    |
|              | opt_rad              |                                       | 3      | 3      | 3      | 3      | 3      | 3      |                                                             | 3      | 3      | 3      | 3      | 3      | 3    |    |
|              | opt_alb              |                                       | 2      | 2      | 2      | 2      | 2      | 2      |                                                             | 2      | 2      | 2      | 2      | 2      | 2    |    |
|              | opt_snf              |                                       | 1      | 1      | 1      | 1      | 1      | 1      |                                                             | 1      | 1      | 1      | 1      | 1      | 1    |    |
|              | opt_tbot             |                                       | 2      | 2      | 2      | 2      | 2      | 2      |                                                             | 2      | 2      | 2      | 2      | 2      | 2    |    |
|              | opt_stc              |                                       | 1      | 1      | 1      | 1      | 1      | 1      |                                                             | 1      | 1      | 1      | 1      | 1      | 1    |    |
|              | opt_gla              |                                       | 1      | 1      | 1      | 1      | 1      | 1      |                                                             | 1      | 1      | 1      | 1      | 1      | 1    |    |
|              | opt_rsf              |                                       | 1      | 1      | 1      | 1      | 1      | 1      |                                                             | 1      | 1      | 1      | 1      | 1      | 1    |    |
|              | opt_soil             |                                       | 1      | 1      | 1      | 1      | 1      | 1      |                                                             | 1      | 1      | 1      | 1      | 1      | 1    |    |
| opt_pedo     |                      | 1                                     | 1      | 1      | 1      | 1      | 1      |        | 1                                                           | 1      | 1      | 1      | 1      | 1      |      |    |
| opt_crop     |                      | 0                                     | 0      | 0      | 0      | 0      | 0      |        | 0                                                           | 0      | 0      | 0      | 0      | 0      |      |    |

|                         |                        |                |
|-------------------------|------------------------|----------------|
| time_control            |                        |                |
| run_days                | 6                      |                |
| run_hours               | 0                      |                |
| run_minutes             | 0                      |                |
| run_seconds             | 0                      |                |
| start_year              | 2016                   | 2016           |
| start_month             | 5                      | 5              |
| start_day               | 1                      | 1              |
| start_hour              | 0                      | 0              |
| start_minute            | 0                      | 0              |
| start_second            | 0                      | 0              |
| end_year                | 2016                   | 2016           |
| end_month               | 5                      | 5              |
| end_day                 | 7                      | 7              |
| end_hour                | 0                      | 0              |
| end_minute              | 0                      | 0              |
| end_second              | 0                      | 0              |
| interval_seconds        | 21600                  |                |
| input_from_file         | TRUE                   | TRUE           |
| history_interval        | 180                    | 180            |
| frames_per_outfile      | 8                      | 8              |
| restart                 | TRUE                   |                |
| restart_interval        | 1440                   |                |
| override_restart_timers | TRUE                   |                |
| write_hist_at_0h_rst    | TRUE                   |                |
| io_form_history         | 2                      |                |
| io_form_restart         | 2                      |                |
| io_form_input           | 2                      |                |
| io_form_boundary        | 2                      |                |
| debug_level             | 0                      |                |
| output_diagnostics      | 1                      |                |
| auxinput4_lname         | "wflowinp_d<domain>"   |                |
| auxinput4_interval      | 360                    | 360            |
| io_form_auxinput4       | 2                      |                |
| auxhist3_outname        | xtrm d<domain> <date>  |                |
| io_form_auxhist3        | 2                      |                |
| auxhist3_interval       | 1440                   | 1440           |
| frames_per_auxhist3     | 6                      | 6              |
| auxhist4_outname        | hrly d<domain> <date>  |                |
| io_form_auxhist4        | 2                      |                |
| auxhist4_interval       | 60                     | 60             |
| frames_per_auxhist4     | 144                    | 144            |
| l_auxhist8_outname      | rfdly d<domain> <date> |                |
| l_auxhist8_interval     | 1440                   | 1440           |
| l_io_form_auxhist8      | 2                      |                |
| l_frames_per_auxhist8   | 6                      | 6              |
| l_ofields_filename      | "iofields.txt"         | "iofields.txt" |
| domains                 |                        |                |
| time_step               | 90                     |                |
| time_step_fract_num     | 0                      |                |
| time_step_fract_den     | 1                      |                |
| max_dom                 | 2                      |                |
| s_we                    | 1                      | 1              |
| e_we                    | 540                    | 616            |
| s_sn                    | 1                      | 1              |
| e_sn                    | 363                    | 501            |
| s_vert                  | 1                      | 1              |
| e_vert                  | 45                     | 45             |
| dzbot                   | 50                     |                |
| max_dt                  | 1000                   |                |
| dzstretch_s             | 1.2                    |                |
| dzstretch_u             | 1.05                   |                |
| p_top_requested         | 5000                   |                |
| dx                      | 19567.24               | 3913.447       |
| dy                      | 19567.24               | 3913.447       |
| grid_id                 | 1                      | 2              |
| parent_id               | 0                      | 1              |
| i_parent_start          | 1                      | 205            |
| j_parent_start          | 1                      | 90             |
| parent_grid_ratio       | 1                      | 5              |
| parent_time_step_ratio  | 1                      | 5              |
| feedback                | 0                      |                |
| timeouth_option         | 0                      |                |
| nproc_x                 | -1                     |                |
| nproc_y                 | -1                     |                |
| dynamics                |                        |                |
| rk_ord                  | 3                      |                |
| lv_damping              | 1                      |                |
| diff_opt                | 1                      | 1              |
| km_opt                  | 4                      | 4              |
| diff_6th_opt            | 0                      | 0              |
| diff_6th_factor         | 0.12                   |                |
| base_temp               | 290                    |                |
| damp_opt                | 1                      |                |
| zdamp                   | 5000                   | 5000           |
| dampcoef                | 0.01                   | 0.01           |
| khdf                    | 0                      | 0              |
| kvdf                    | 0                      | 0              |
| non_hydrostatic         | TRUE                   | TRUE           |
| moist_adv_opt           | 1                      | 1              |
| scalar_adv_opt          | 1                      | 1              |
| gwd_opt                 | 1                      |                |
| bdy_control             |                        |                |
| spec_bdy_width          | 5                      |                |
| spec_zone               | 1                      |                |
| relax_zone              | 4                      |                |
| specified               | TRUE                   | FALSE          |
| nested                  | FALSE                  | TRUE           |
| namelist_quit           |                        |                |
| nio_tasks_per_group     | 0                      |                |
| nio_groups              | 0                      | 1              |
